# Supplementary material for: Proteomic Profiling Identifies Specific Leukemic Stem Cell-Associated Protein Expression Patterns in Pediatric AML Patients
Source: MDPI journal article supplement (doi:10.3390/cancers14153567), 2022-07-22
Supplement: s1 [file s1]

**Table S2. Purity of FACS sorted subsets**

| Cell subset   | pAML17                            |      | pAML20                            |      | pAML21                            |      | pAML23                            |      | pAML29                            |      |
|---------------|-----------------------------------|------|-----------------------------------|------|-----------------------------------|------|-----------------------------------|------|-----------------------------------|------|
|               | Events/<br>events in<br>cell gate | %    |
| <b>AML-SC</b> | 51/51                             | 100% | 3556/3572                         | 100% | 163/163                           | 100% | 537/540                           | 99%  | 701/705                           | 99%  |
| <b>PC1</b>    | 25/27                             | 93%  | 6655/6734                         | 99%  | 48/63                             | 76%  | 1088/1113                         | 98%  | 856/865                           | 99%  |
| <b>PC2</b>    | 16/16                             | 100% | 28/28                             | 100% | 95/97                             | 98%  | 3102/3133                         | 99%  | 657/659                           | 100% |
| <b>BC1</b>    | 7054/7071                         | 100% | 6013/6053                         | 100% | 1615/1641                         | 98%  | 544/545                           | 100% | 652/661                           | 99%  |
| <b>BC2</b>    | 40/43                             | 93%  | 175/208                           | 84%  | 612/674                           | 91%  | 412/425                           | 97%  | 139/140                           | 99%  |

| Cell subset      | NBM09                             |      | NBM10                             |      | NBM11                             |      | NBM12                             |      | NBM13                             |      |
|------------------|-----------------------------------|------|-----------------------------------|------|-----------------------------------|------|-----------------------------------|------|-----------------------------------|------|
|                  | Events/<br>events in<br>cell gate | %    |
| <b>HSC</b>       | 405/405                           | 100% | n.a.                              | n.a. | 33/35                             | 94%  | 28/28                             | 100% | 12/12                             | 100% |
| <b>CMP1</b>      | 205/210                           | 98%  | 51/54                             | 94%  | 14/18                             | 78%  | 22/23                             | 96%  | 23/25                             | 92%  |
| <b>CMP2</b>      | 367/399                           | 92%  | 82/84                             | 98%  | 28/31                             | 90%  | 70/73                             | 96%  | 28/28                             | 100% |
| <b>GMP1</b>      | 284/299                           | 95%  | 41/44                             | 93%  | 11/12                             | 92%  | 254/270                           | 94%  | 53/55                             | 96%  |
| <b>GMP2</b>      | 284/295                           | 96%  | 336/348                           | 97%  | 14/14                             | 100% | 186/186                           | 100% | 24/24                             | 100% |
| <b>MEP</b>       | 86/86                             | 100% | 193/197                           | 98%  | 18/18                             | 100% | 20/23                             | 87%  | 22/23                             | 96%  |
| <b>C12A+ Pre</b> | -                                 | -    | 132/132                           | 100% | -                                 | -    | 221/222                           | 100% | 70/74                             | 95%  |

*n.a.: not analyzed, due to low cell numbers*
