# Supplementary material for: Proteomic Profiling Identifies Specific Leukemic Stem Cell-Associated Protein Expression Patterns in Pediatric AML Patients
Source: MDPI journal article supplement (doi:10.3390/cancers14153567), 2022-07-22
Supplement: s1 [file s1]

**Table S1. Reagents used in FACS experiments**

| Sample   | Specificity                              | Fluorochrome | MoAb Clone | Catalog # | Company         |
|----------|------------------------------------------|--------------|------------|-----------|-----------------|
| NBM      | CD90                                     | BV421        | 5E10       | 328122    | BioLegend       |
| NBM      | CD38                                     | ECD          | LS198-4-3  | A99022    | Beckman Coulter |
| NBM/pAML | CLEC12A <sup>§</sup>                     | PE           | HB3        | -         | -               |
| NBM      | CD45RA                                   | FITC         | HI100      | 304106    | BioLegend       |
| NBM      | CD2                                      | PE-Cy5       | RPA2.10    | 300209    | BioLegend       |
| NBM      | CD3                                      | PE-Cy5       | HIT3α      | 300309    | BioLegend       |
| NBM      | CD4                                      | PE-Cy5       | RPA-T4     | 300509    | BioLegend       |
| NBM      | CD7                                      | PE-Cy5       | CD7-6B7    | 343110    | BioLegend       |
| NBM      | CD8a                                     | PE-Cy5       | RPA-T8     | 301009    | BioLegend       |
| NBM      | CD10                                     | PE-Cy5       | HI10a      | 312206    | BioLegend       |
| NBM      | CD11b                                    | PE-Cy5       | ICRF44     | 301307    | BioLegend       |
| NBM      | CD14                                     | PE-Cy5       | RMO52      | A07765    | Beckman Coulter |
| NBM      | CD19                                     | PE-Cy5       | HIB19      | 302209    | BioLegend       |
| NBM      | CD20                                     | PE-Cy5       | 2H7        | 302307    | BioLegend       |
| NBM      | CD56                                     | PE-Cy5       | B159       | 555517    | BD Biosciences  |
| NBM      | CD235a                                   | PE-Cy5       | HIR2       | 306605    | BioLegend       |
| NBM      | CD123                                    | PE-Cy7       | 6H6        | 306010    | BioLegend       |
| NBM      | CD34                                     | APC          | 581        | 343510    | BioLegend       |
| NBM/pAML | Membrane permeability,<br>amine reactive | Zombie NIR   | -          | 423105    | BioLegend       |
| pAML     | CD38                                     | FITC         | HIT2       | 303504    | BioLegend       |
| pAML     | CD45                                     | BV510        | HI30       | 563204    | BD Biosciences  |
| pAML     | CD34                                     | PerCP-Cy5.5  | 581        | 343521    | BioLegend       |
| pAML     | CD3                                      | PB           | UCHT1      | 300431    | BioLegend       |

APC: Allophycocyanin; Bcl-2: B-cell lymphoma 2; BV: Brilliant Violet; CLEC12A: C-type lectin domain family 12 member A; ECD: Electron Coupled Dye, also known as PE-Texas-Red; FITC: Fluorescein isothiocyanate; MoAb: Monoclonal antibody; PB: Pacific Blue; PE: Phycoerythrin; PerCP-Cy5.5: Peridinin-chlorophyll protein-cyanine 5.5; PE-Cy5: Phycoerythrin-Cyanine 5; PE-Cy7: Phycoerythrin-Cyanine7. <sup>§</sup>The CLEC12A monoclonal antibody was produced in-house from the HB3 hybridoma and conjugated by Agilent, Glostrup, Denmark. The leukemia and healthy samples are indicated as pAML and NBM, respectively.
