# Supplementary material for: Proteomic Profiling Identifies Specific Leukemic Stem Cell-Associated Protein Expression Patterns in Pediatric AML Patients
Source: Cancers (Basel). 2022 Jul 22;14(15):3567. doi: 10.3390/cancers14153567 (PMC9332109; doi:10.3390/cancers14153567)
Supplement: Supplementary file 1 [file cancers-14-03567-s001.zip]

Archive with 10 entries (10 files):
- Supplementary Figure legends_Petersen et al.pdf
- Supplementary Information_Petersen et al.pdf
- Table S1_Petersen et al.pdf
- Table S2_Petersen et al.pdf
- Table S3_Petersen et al.xlsx
- Table S4_Petersen et al.xlsx
- Table S5_Petersen et al.xlsx
- Table S6_Petersen et al.xlsx
- Table S7_Petersen et al.xlsx
- Table S8_Petersen et al.xlsx
