# Supplementary material for: Proteomic Profiling Identifies Specific Leukemic Stem Cell-Associated Protein Expression Patterns in Pediatric AML Patients
Source: Cancers (Basel). 2022 Jul 22;14(15):3567. doi: 10.3390/cancers14153567 (PMC9332109; doi:10.3390/cancers14153567)
Supplement: Supplementary file 1 [file cancers-14-03567-s001.zip › Table S3_Petersen et al.xlsx]

## Sheet: 456 proteins detected in all sa
Table S3. Proteins identified in all eligible samples
		NBM09					NBM10					NBM11			NBM12					NBM13							pAML17					pAML20				pAML21					pAML23					pAML29
T: Protein names	T: Gene names	HSC	MEP	GMP1	GMP2	CMP2	MEP	GMP1	GMP2	CMP2	C12A+ Pre	HSC	GMP1	CMP1	MEP	GMP1	C12A+ Pre	GMP2	CMP1	HSC	MEP	GMP1	C12A+ Pre	GMP2	CMP1	CMP2	LSC	PC1	PC2	BC1	BC2	LSC	PC1	BC1	BC2	LSC	PC1	PC2	BC1	BC2	LSC	PC1	PC2	BC1	BC2	LSC	PC1	PC2	BC1
Glutamine amidotransferase-like class 1 domain-containing protein 3A, mitochondrial	GATD3A	23.3638	22.873	22.6068	22.9314	22.0825	22.568	22.3204	22.7184	20.1775	22.791	22.2108	22.4084	22.0698	22.7061	22.7405	22.3657	23.203	23.2328	22.2678	22.9446	22.7503	22.3464	22.6244	22.4962	22.1843	23.3584	22.6488	21.9443	22.8929	21.6769	24.2931	23.3393	23.0847	22.9552	22.8026	22.693	22.4345	23.6044	22.8073	23.9579	23.5162	23.6816	22.8805	23.4342	22.9235	23.157	23.4468	23.4158
Nascent polypeptide-associated complex subunit alpha;Nascent polypeptide-associated complex subunit alpha, muscle-specific form	NACA	24.4539	25.4478	25.0907	24.5155	25.1703	25.5076	25.6139	24.6681	25.1949	22.9304	24.4232	25.0177	24.8013	25.1889	25.4542	25.0225	24.8517	24.3784	24.2007	25.3519	24.7664	24.7774	24.7183	23.6611	24.9489	24.2162	25.0211	24.1547	25.0844	23.8409	24.9292	25.2102	25.2052	24.8438	24.2625	24.8594	25.3102	25.329	25.5992	22.7612	22.9118	22.865	23.0101	22.7024	22.8102	23.5793	23.3023	22.9574
Chloride intracellular channel protein 1	CLIC1	25.0682	26.3185	26.3156	26.1554	26.1146	25.9595	25.7487	25.3739	25.6721	26.0653	25.3253	25.6609	25.3085	26.3612	26.1727	26.3197	25.6734	25.264	25.3559	25.4728	25.4819	25.6285	25.5394	24.4323	25.9868	25.2955	25.9208	25.0492	26.7716	25.5073	26.9269	26.8547	26.9337	26.717	25.0978	25.5354	26.0898	26.8528	26.7624	26.7529	26.9331	27.1538	26.5553	27.2868	26.5142	26.5479	26.5902	26.7584
Cytochrome c oxidase subunit NDUFA4	NDUFA4	25.5722	24.2552	24.4053	23.9626	24.2275	23.5677	22.9459	23.7406	21.6928	23.5925	22.8657	22.4143	22.9199	23.525	23.579	23.0418	22.8191	21.4609	22.2017	22.5942	22.5829	22.6028	22.4708	21.9372	22.3237	23.1951	23.1099	22.9827	23.7918	22.5709	23.7027	23.6164	23.7836	23.0497	21.5816	22.7063	22.5201	23.6551	23.2574	24.3263	23.6038	24.0803	24.0805	23.6642	23.7803	24.057	23.8559	24.1286
26S proteasome non-ATPase regulatory subunit 14	PSMD14	21.2433	21.2661	21.4622	20.9686	20.7693	20.3474	20.5413	19.7757	22.1592	19.5837	20.6727	20.3466	20.6003	21.2193	20.9836	20.7527	20.4952	20.9687	20.0047	20.435	19.9488	20.1107	20.0404	19.7017	21.2156	20.0757	20.4669	20.602	19.7964	20.5051	20.4099	20.8323	20.8853	20.3787	20.3519	20.5453	20.8647	20.2494	20.6195	20.5835	20.5938	19.9988	20.0525	20.1719	20.0716	21.7714	20.4041	20.0745
Na(+)/H(+) exchange regulatory cofactor NHE-RF1	SLC9A3R1	22.0077	21.9786	22.2096	22.8054	22.3808	21.9433	22.5451	22.4634	21.1333	20.2948	22.1372	22.722	22.4308	21.8756	22.4001	22.5023	21.7776	22.3792	22.8937	22.8054	22.1253	21.8761	22.6972	22.1701	22.5545	22.9116	22.489	22.8964	21.5715	21.999	23.7436	22.8476	22.9102	24.1983	22.2049	22.0552	21.881	21.4357	22.3522	22.0663	21.6161	22.6965	21.9785	22.5603	21.5123	21.4009	21.9713	21.5219
Proteasome subunit alpha type-7;Proteasome subunit alpha type-7-like	PSMA7;PSMA8	25.2343	25.1397	25.2621	25.2365	24.9476	25.2048	25.2728	25.1973	25.0737	24.469	25.0369	25.1059	24.8806	25.144	25.1937	25.0088	25.335	25.1938	24.9505	24.6552	24.897	24.849	25.1846	24.9312	25.2892	25.302	25.2947	25.5317	25.2081	25.2418	25.5217	25.5635	25.2313	25.4519	25.5316	25.221	25.1689	25.2922	25.5444	24.9822	25.0782	24.853	24.7839	25.035	24.9417	24.3459	24.6912	24.9041
Myosin regulatory light chain 12A;Myosin regulatory light chain 12B	MYL12A;MYL12B	25.3075	24.503	24.6284	25.1308	25.1655	24.3616	24.921	25.1234	25.3861	24.476	25.0571	25.1653	24.9414	24.672	24.9839	25.1631	25.3562	24.8034	25.3879	24.6971	25.0656	25.151	25.2358	25.3481	25.3185	25.2412	25.2099	23.5499	25.5678	25.5486	25.6519	25.442	26.2351	25.7658	25.2018	25.287	24.921	25.7353	26.0229	25.3553	24.3006	24.4997	25.1668	24.8892	24.9398	25.5901	24.9372	25.8369
Heterogeneous nuclear ribonucleoprotein D-like	HNRNPDL	23.9301	24.831	24.9779	25.116	24.8896	25.1847	25.1552	24.9113	22.9079	24.269	24.1593	24.9019	24.7992	25.154	25.0594	24.7317	25.0758	24.7765	24.2569	25.2323	24.9626	24.5231	24.7302	24.6532	24.8493	23.9957	24.6398	24.6473	24.3715	24.2008	24.7913	24.7315	24.5818	24.3923	24.3545	24.4453	25.0589	24.5818	25.0774	24.5845	24.6324	24.7199	23.9519	24.3452	24.7219	24.9794	24.793	24.0655
Actin-related protein 2/3 complex subunit 2	ARPC2	23.4021	23.7058	24.2793	24.0178	23.826	23.5079	24.2066	23.477	24.5314	24.3834	23.6177	23.9444	23.3466	22.8217	24.1472	24.3911	23.6296	24.2328	23.2048	23.5734	23.5466	24.1389	22.8553	22.8821	22.8446	23.3289	23.6903	22.9698	24.2612	23.3162	24.1928	24.1564	25.1677	25.2241	23.3034	23.6859	23.7219	24.9727	25.3526	23.8129	23.6581	23.4842	24.5906	23.6636	23.5307	23.2914	23.4282	24.0891
Pre-mRNA-splicing factor ATP-dependent RNA helicase DHX15	DHX15	20.9107	21.1575	21.2888	21.2558	21.4359	21.9311	21.6069	21.4249	20.7054	23.0826	21.308	21.5751	21.2187	21.5578	22.0824	21.9686	21.722	21.9629	20.9305	22.3976	21.685	21.6941	21.8097	21.2029	21.9801	21.3051	21.7152	21.6771	20.7274	21.6744	20.9803	21.0024	21.1087	20.8656	20.7785	21.4848	22.0603	20.7443	21.3322	21.9681	21.8859	21.8314	22.2925	21.7858	20.8212	21.6342	21.3206	20.6035
Cytochrome b5 type B	CYB5B	21.5454	22.3836	22.1936	22.2109	22.4457	22.1586	22.4827	22.2311	20.9632	21.8841	22.7506	23.0008	23.2606	22.4854	22.4405	22.0905	21.7785	22.0214	23.2434	23.0135	22.3463	21.5959	23.1461	21.7896	23.0085	22.0163	22.1633	22.309	22.48	22.8759	22.3821	22.5925	22.6629	22.8739	22.5055	22.5756	22.3942	22.3153	22.3794	20.6725	19.5894	20.1294	20.0007	20.2904	20.4869	20.7658	20.6305	21.0315
Thioredoxin-like protein 1	TXNL1	22.319	23.0264	21.5435	21.8723	22.4823	23.8307	22.7549	22.4385	21.6252	21.8575	21.5244	22.5843	21.9122	23.8594	22.5702	22.2396	22.6504	22.1705	21.9428	23.8875	22.4853	21.735	22.2601	21.5272	22.3184	21.8754	21.8005	21.5143	22.1226	21.5173	22.551	23.0688	21.8511	22.4255	22.9922	20.9401	22.9729	21.9199	22.2811	23.3464	22.7691	23.2701	22.7914	23.0458	22.9226	23.1115	23.1557	22.6946
Peptidyl-prolyl cis-trans isomerase H	PPIH	21.0572	21.5597	21.8001	21.3428	21.486	21.3817	21.4475	21.2607	19.9676	21.9752	20.4086	22.1458	21.0885	22.0326	21.7379	21.3444	21.7988	21.639	20.3816	21.3552	20.8362	20.7152	20.8876	20.6831	21.4234	20.3691	21.2957	21.2354	20.727	20.1804	20.7275	21.1073	20.9629	21.0104	20.9511	20.8175	21.0005	20.8701	21.3771	22.8473	22.2021	22.3761	21.964	22.4422	22.6671	21.6545	21.4881	21.4994
Ragulator complex protein LAMTOR5	LAMTOR5	21.5293	21.8986	21.2292	21.0634	20.7687	21.4106	22.079	21.6078	20.3681	21.5556	21.8152	22.0104	21.9073	22.467	21.8581	22.1497	21.1038	21.3819	21.5998	22.4866	22.3883	21.8072	21.2172	21.8061	20.9644	21.2795	21.6725	20.8049	22.2179	20.3742	22.6154	22.4361	22.9941	21.8201	21.5768	21.685	21.735	22.1824	22.4632	22.7373	22.6159	22.4955	22.4364	21.7653	22.3474	22.2059	22.0171	22.6599
Mitotic checkpoint protein BUB3	BUB3	22.4027	23.1553	23.1577	23.0141	22.8346	23.5843	23.0729	22.954	21.726	22.3557	22.3664	23.0277	22.6175	23.6043	22.9104	22.9584	23.0016	23.129	22.4496	23.3436	22.4338	22.8517	22.5502	21.9455	22.4993	22.5007	22.817	22.529	23.0667	22.3996	22.9163	22.9573	22.8707	22.8874	22.1848	22.6585	23.1069	22.7651	23.1858	22.8078	22.7447	22.6405	22.3525	22.3341	21.8731	22.6802	22.5674	22.2084
Alpha-actinin-4	ACTN4	26.3879	26.6077	26.8845	26.4305	26.6327	26.7395	27.2182	26.753	27.4953	26.1055	26.3671	26.9407	26.5304	26.8353	27.2238	27.4618	26.7302	26.7213	26.0246	26.849	26.8464	27.1317	26.5371	26.3704	26.6175	26.2155	26.8801	26.1832	27.5966	26.3318	27.2849	27.7047	27.8568	28.0585	26.3504	26.9007	27.1384	27.7188	27.6237	25.8424	25.7979	26.0909	25.9502	26.201	25.6012	25.8688	25.7854	26.4778
Dynamin-like 120 kDa protein, mitochondrial;Dynamin-like 120 kDa protein, form S1	OPA1	22.9406	21.5899	21.8982	21.8815	22.8329	22.5096	22.1449	22.3228	21.1994	21.6226	21.5987	21.4862	21.8957	22.0388	22.2958	21.4532	22.1368	22.2277	22.0036	22.2684	22.0414	21.469	21.8266	21.3081	21.9098	20.5908	21.59	21.4364	22.4853	21.248	23.1192	23.0518	22.7724	22.2913	21.9995	21.3445	22.0123	22.9683	22.7702	22.5908	22.8529	23.4145	23.1224	22.3132	22.3175	20.9865	23.1131	22.3139
Heterogeneous nuclear ribonucleoprotein Q	SYNCRIP	25.2328	25.8013	25.9224	25.7192	25.6232	25.7629	25.7772	25.8072	24.0678	25.6107	24.5645	25.512	25.0087	26.0848	26.0155	25.5089	25.5755	25.35	23.4422	25.5218	25.4341	25.2103	24.6162	23.8903	24.8227	24.1308	24.5362	23.3978	25.9102	23.288	25.7222	26.0278	25.7942	25.2651	24.031	24.9875	25.6486	26.0292	26.1669	25.67	25.6584	25.5944	25.168	25.453	25.3102	25.6909	25.5487	25.0484
Histone H2B type 1-L;Histone H2B type 1-M;Histone H2B type 1-N;Histone H2B type 1-H;Histone H2B type 2-F;Histone H2B type 1-C/E/F/G/I;Histone H2B type 1-D;Histone H2B type F-S;Histone H2B type 1-K;Histone H2B type 1-A	HIST1H2BL;HIST1H2BM;HIST1H2BN;HIST1H2BH;HIST2H2BF;HIST1H2BC;HIST1H2BD;H2BFS;HIST1H2BK;HIST1H2BA	29.1246	27.3132	26.684	29.1677	27.8369	27.7266	28.1926	29.069	25.5362	29.0983	27.4472	28.1706	27.8167	29.0461	26.5558	26.9077	28.2686	29.7541	27.7929	28.845	28.9009	28.1631	28.8565	28.1462	28.5299	28.5572	26.636	25.8213	28.928	27.8685	27.87	27.7129	28.015	27.8693	25.9269	27.6592	26.5937	26.9032	28.0108	30.7037	29.2035	30.1494	29.5949	31.6505	29.9218	30.4108	30.4058	30.5155
WD repeat-containing protein 1	WDR1	26.0307	25.9734	25.8784	26.0401	25.5712	25.821	25.5358	25.8507	25.5462	25.8372	26.1186	25.6041	25.3584	26.0856	25.8778	26.0325	25.754	25.088	25.9839	25.941	25.5919	25.5668	25.6407	25.2358	25.5048	25.9725	25.7955	23.9211	26.0333	25.121	25.6561	25.3362	25.953	26.89	25.9248	25.5168	25.9863	26.0535	26.6119	26.0468	25.7918	25.8495	25.6681	26.2099	26.052	25.9855	25.8316	26.1591
Gamma-glutamylcyclotransferase	GGCT	22.2904	22.8279	23.3989	23.8082	23.9535	22.9828	23.3678	23.1201	25.095	22.7206	24.2271	22.8775	24.4109	22.8847	23.8019	22.4057	23.8703	24.0394	23.8832	22.2121	24.0335	23.151	23.2623	24.3393	23.6822	24.0771	23.5445	25.5908	22.4944	24.2425	23.2616	23.3031	22.8139	22.1944	24.9272	23.4726	24.0295	23.1803	22.1828	22.6291	22.4877	22.398	23.8113	22.6238	22.9096	23.168	22.8139	22.8834
Core histone macro-H2A.1	H2AFY	25.6511	24.6679	25.0224	25.5722	24.776	23.5168	24.8331	24.9803	24.7552	25.9008	25.9261	25.0055	25.3953	24.8835	25.014	24.5185	24.896	25.9341	25.841	24.5313	25.1809	24.7766	25.0646	25.0202	25.1003	24.7696	24.3466	23.256	23.3681	24.0623	24.5764	24.0864	23.5134	23.4877	22.9288	24.9407	23.8081	24.0068	23.7376	25.0869	24.1104	24.8599	24.7432	25.9036	23.5823	24.0475	23.9968	24.6936
SH3 domain-binding glutamic acid-rich-like protein	SH3BGRL	22.9091	23.8807	23.4707	23.9239	24.4476	23.9718	23.9616	23.4116	22.4393	23.1839	23.3297	23.7439	23.543	24.0755	23.8815	23.9832	23.58	23.1408	23.6228	24.028	23.4832	23.5438	23.5327	23.7975	24.0593	22.9335	23.4781	23.1182	23.5704	21.6659	23.8013	22.9726	23.8826	22.5185	23.7455	21.6398	23.9814	23.6696	23.713	23.8684	23.6729	24.5508	23.9701	23.7212	23.5938	23.5974	23.6921	23.7859
Citrate synthase, mitochondrial	CS	23.7032	23.3103	22.7019	23.0879	23.2217	23.1223	23.0288	22.7705	22.2783	23.7916	22.5695	23.0021	22.8804	23.1023	23.5659	23.3899	23.0054	23.5533	22.5104	23.5187	23.2437	22.7697	23.0118	22.5877	23.3205	23.0691	22.9624	22.1945	23.32	22.8653	23.744	23.4241	23.5427	23.3289	23.0246	23.0381	23.3805	24.1792	23.65	23.5766	22.9216	22.9904	22.8123	22.8996	23.4524	23.2755	22.563	22.7634
Vesicle-trafficking protein SEC22b	SEC22B	22.5885	21.585	21.5958	20.8037	21.6556	21.9566	22.0527	22.1828	21.2564	21.3825	21.7231	21.4105	21.5401	21.9388	22.363	22.0131	22.1735	21.8383	21.8459	22.4476	22.2868	22.2989	21.8065	21.7101	22.6582	22.1613	21.8836	20.3592	22.578	21.6187	22.1443	22.1673	22.6059	22.2864	21.4623	22.1812	22.0838	22.8276	22.7678	21.5839	21.1211	21.5148	21.4797	22.0542	20.7829	21.5094	21.1181	21.8146
Isocitrate dehydrogenase [NADP] cytoplasmic	IDH1	25.6702	22.9753	23.4964	22.8604	22.8413	22.4427	23.6572	23.4143	23.0303	23.8997	23.1271	23.2362	22.0665	22.8928	24.184	23.9319	22.9997	22.9216	21.8776	22.8167	23.9704	23.7393	23.2337	22.5693	21.8561	23.1674	23.0731	21.8661	24.0368	21.6956	24.6001	25.063	25.5099	22.7809	23.3378	23.8678	22.9622	24.867	23.621	23.7362	23.4773	23.6805	23.8436	23.4033	22.8688	22.9642	22.6829	23.3062
ATP synthase subunit d, mitochondrial	ATP5H	25.0318	23.7855	24.2625	23.1998	23.9095	24.0453	23.1067	23.8658	22.4876	23.1869	22.4009	23.492	22.7713	24.6663	23.8694	23.3815	23.479	23.8454	22.9916	24.4064	23.6218	23.6787	23.1352	22.5081	24.2101	23.2926	23.5045	23.0142	23.9295	23.233	23.7791	23.9622	23.8535	23.6907	22.4693	23.4803	23.8418	24.3625	23.9388	23.9587	23.5857	24.0331	24.264	25.3485	24.3101	24.3856	24.4035	24.411
Erlin-2	ERLIN2	22.6147	22.3625	23.1055	22.918	22.6496	21.3966	23.2349	22.2992	21.7738	21.5763	23.0743	23.346	22.864	22.4444	23.2561	22.9439	22.4369	22.8891	23.4539	22.5309	23.1443	22.7994	22.0141	22.9448	22.7554	23.3571	23.2678	22.6488	23.2125	22.6144	23.8467	23.625	23.8541	21.8587	23.4324	23.1149	22.4852	23.2872	21.8083	20.6958	21.5779	22.4013	21.1716	21.0884	21.7463	22.4219	21.671	22.0157
CUGBP Elav-like family member 2	CELF2	19.4729	21.5916	21.6364	21.6623	22.5088	22.0873	22.0854	22.5636	19.6538	21.202	21.5321	22.6289	22.2925	22.0572	22.4238	22.2244	22.0749	23.0463	21.0712	22.3228	21.7754	21.8258	21.9173	21.1352	20.8911	22.5418	22.3147	21.1471	22.831	21.2534	22.5746	22.2111	22.662	22.0809	21.6843	22.1339	21.6749	22.8053	22.6337	22.1812	21.8651	22.1708	21.0611	21.9027	21.4069	22.5579	21.8636	22.4742
Thioredoxin domain-containing protein 12	TXNDC12	21.7664	21.67	22.2105	22.0907	21.512	21.5872	22.5904	22.0317	20.7957	22.5409	21.4172	22.3713	21.7795	22.3728	22.4758	22.6226	22.2676	22.0658	21.4809	21.8545	22.0077	22.3526	21.6433	22.152	20.5936	20.9395	21.6481	20.8669	22.4559	21.8043	22.0169	22.2675	23.0023	21.8448	21.3815	22.593	21.7727	22.8365	22.2648	22.1522	21.716	21.2528	22.5279	21.9345	22.2464	22.7121	22.4701	22.4119
Actin-like protein 6A	ACTL6A	22.4865	23.1058	22.697	22.5378	22.8513	22.9665	22.7169	22.9437	21.2062	21.6099	21.559	22.4961	22.3499	23.264	22.9375	22.3472	22.9185	22.126	21.1573	23.0962	22.3154	22.1076	22.2429	21.1791	22.0306	21.6442	21.9556	21.7013	23.0318	21.0925	23.0751	23.3701	22.9222	22.8789	22.0401	21.7523	22.8476	22.6247	23.0762	22.5867	22.3791	22.526	21.5399	22.1322	22.5202	22.4467	22.4419	21.6033
L-lactate dehydrogenase A chain	LDHA	26.2454	25.9791	26.3464	26.1517	26.056	24.8621	25.9323	25.3603	27.496	25.418	25.4689	25.7664	25.6928	25.2822	26.2666	25.9318	26.123	26.1603	25.335	25.6119	25.9758	25.7211	25.4264	24.9947	25.2957	25.3755	25.6587	25.5205	25.6089	25.5336	26.4387	25.9673	26.3578	25.2818	25.311	25.4574	26.1587	25.6254	25.9191	24.9274	24.8886	25.0879	24.8714	25.2356	25.283	25.6352	25.472	25.4477
Glutamate dehydrogenase 1, mitochondrial;Glutamate dehydrogenase 2, mitochondrial	GLUD1;GLUD2	27.9487	26.1124	25.4651	25.5522	26.0597	25.2869	24.8458	25.5097	23.2981	23.674	25.6773	24.7797	24.5581	24.9599	25.0264	24.376	25.0884	24.7004	25.3384	24.8933	24.5755	24.4445	24.6155	23.8343	24.3846	25.6252	25.1524	25.1918	24.7058	24.3706	25.959	25.3084	25.6653	25.4334	25.1746	24.966	24.96	25.2158	24.6421	24.5748	24.117	24.4448	24.1342	24.409	24.3317	24.1894	24.5283	24.3234
Cytochrome c oxidase subunit 2	MT-CO2	24.3218	24.8142	24.8678	25.1285	25.0072	25.0381	24.8917	24.5622	23.5376	24.7718	24.2336	25.0137	24.2298	25.586	25.2262	24.9497	24.4591	24.6161	23.8787	24.8906	24.1244	23.9529	24.4697	24.3099	24.4195	24.3971	24.6868	24.4775	25.0339	24.8394	24.2858	24.7879	25.4629	24.1588	23.3506	24.2199	24.9681	24.7975	24.5172	23.5074	24.1436	24.1699	24.4714	23.194	24.9517	24.2748	23.9434	24.1385
Purine nucleoside phosphorylase	PNP	23.8917	24.4896	24.1428	24.6733	24.547	24.5606	24.6443	24.0295	26.132	23.8005	24.1813	24.5659	24.5581	24.3216	24.5837	24.7287	24.175	23.5584	24.0546	24.0552	24.0581	24.1559	23.802	24.0584	23.9769	24.1387	24.5969	24.7399	23.9491	24.1892	24.4635	24.3998	25.1795	25.1162	23.8794	24.3619	24.5097	24.7406	24.6194	23.1252	22.9342	22.3251	23.6932	22.539	23.1161	23.0761	22.9344	23.4366
Hypoxanthine-guanine phosphoribosyltransferase	HPRT1	23.8328	23.3775	22.5577	22.8645	23.4717	23.4983	23.4064	23.152	21.4235	22.8414	22.3394	22.8321	21.9611	23.3864	23.7352	23.1063	23.1472	22.9858	22.512	23.6561	22.7602	22.6804	23.368	21.9075	23.0629	22.3307	21.9761	22.7057	22.8086	21.4861	22.6371	23.5271	23.7608	22.9325	22.4917	22.9831	23.4027	23.3006	23.4693	22.2779	22.8391	22.3231	22.1614	21.968	22.0616	22.6136	22.206	22.2824
Aspartate aminotransferase, mitochondrial	GOT2	25.1254	23.724	22.9149	23.8076	23.3027	23.2471	22.7532	23.5809	22.3793	23.6983	23.4402	23.0823	22.6843	23.2005	23.0639	22.2219	23.3121	22.9845	23.552	23.195	23.0638	22.3283	22.8994	22.6001	22.4724	22.9911	22.6265	23.6005	21.761	22.5093	23.296	22.691	22.4152	23.1187	23.4067	22.7876	23.1126	21.9323	22.8104	24.3674	24.0736	24.2446	23.6093	23.1973	24.0539	23.7449	24.0478	23.0528
Phosphoglycerate kinase 1	PGK1	28.2852	27.1831	27.5731	27.4736	27.1827	26.5126	27.2058	26.9341	27.7215	26.7381	27.7573	26.8528	26.491	26.9301	27.6852	27.6602	27.5891	27.2093	27.0446	26.9564	27.2	27.2703	26.8725	26.2941	26.8717	27.3395	27.2983	26.2357	27.8881	26.3683	28.3504	27.8244	28.2528	27.4039	27.4303	27.3143	27.3763	28.5798	28.3853	27.7488	27.0206	27.5144	27.0215	27.4389	26.8769	27.0842	27.057	27.5403
Cystatin-A;Cystatin-A, N-terminally processed	CSTA	23.9505	24.9559	24.7387	25.0111	24.799	24.4344	24.511	25.0307	27.8788	23.9134	25.717	24.4359	25.431	22.8488	24.3591	24.6213	26.445	25.1142	26.126	23.3744	24.9184	25.217	25.6605	26.229	25.4455	26.6244	25.6381	27.6247	24.0173	26.313	23.4829	23.9756	24.6132	23.6128	26.2798	25.5631	26.3537	24.3673	22.2971	23.532	24.8481	22.8852	25.5649	24.5225	25.4174	24.5245	24.4453	23.1817
Ig kappa chain C region	IGKC	21.0893	22.9075	23.7057	25.3143	23.6291	24.1958	23.6002	24.4491	25.09	22.6115	24.6111	23.0462	26.7416	21.8001	23.0109	23.2308	23.8738	25.2998	23.5403	22.7965	23.9959	23.6335	26.4125	25.3805	23.1087	24.3112	24.4016	25.43	22.3987	27.6995	24.2576	23.9276	22.5261	25.6113	25.9653	25.0478	24.1824	23.9097	25.1832	21.0368	23.119	21.5316	22.3923	22.7826	23.6429	22.4724	23.5522	21.9612
HLA class I histocompatibility antigen, B-7 alpha chain	HLA-B	23.472	23.1113	24.0714	24.0016	23.7393	21.7151	23.7128	23.6194	21.4033	21.9469	23.0633	24.1738	22.9187	23.419	23.8947	22.613	23.0735	23.16	20.9458	22.5907	23.1411	23.425	23.6131	20.8128	23.0946	23.1719	23.6188	21.7145	25.2024	23.9022	23.5603	23.9111	23.1361	24.0647	24.5127	24.2307	25.197	23.6835	24.1877	24.4042	24.6049	24.5989	23.4999	24.0882	24.1054	24.2378	24.2417	24.7438
HLA class II histocompatibility antigen, DR alpha chain	HLA-DRA	23.0858	22.6229	24.4854	23.9378	23.1394	22.6091	25.0823	23.6816	21.031	24.2184	23.4337	25.3359	23.6048	22.707	24.8081	25.9905	24.0548	23.3545	23.4067	23.7528	25.184	25.2521	24.2629	23.3367	22.7597	23.9963	25.589	22.2953	25.4708	24.1921	25.1664	25.9514	25.7661	23.1157	24.7609	26.3741	24.3563	28.0104	27.256	25.2035	25.6275	24.8848	25.8098	24.3083	23.3639	24.5696	23.5154	24.4543
Catalase	CAT	26.6234	27.2945	27.581	26.2511	26.895	27.5337	28.1867	27.1281	25.8267	27.3038	26.4505	27.9296	27.2979	27.3821	27.4876	27.6952	26.9361	27.7432	26.8442	27.8919	27.9999	28.0854	26.8105	28.0106	27.0476	27.5628	27.3606	27.4048	27.8003	26.3899	28.3019	28.4889	27.8977	26.3168	27.153	28.3939	27.0606	28.4358	26.3608	26.6736	26.3869	27.0949	26.1083	26.1296	25.5711	25.0807	25.3602	25.7464
Fructose-bisphosphate aldolase A	ALDOA	26.928	27.3933	27.6663	27.2825	27.5151	27.6022	28.0088	27.4493	28.1343	26.6202	27.4496	28.0338	27.6018	27.6776	27.8345	27.9468	27.2301	27.2752	27.2868	27.6512	27.5011	27.6102	26.9405	26.9172	27.0768	27.0863	27.447	26.9199	27.6144	26.8398	27.5633	27.8708	27.961	27.3193	27.5293	27.4667	27.9274	28.0074	27.9183	27.0148	27.0855	27.0107	27.232	26.955	26.6677	27.1261	26.6391	27.1833
Cystatin-B	CSTB	23.9509	23.3597	23.675	24.0505	23.5631	23.4854	23.0309	23.4533	24.1091	23.8693	23.032	22.1969	22.8984	22.7292	22.805	23.0357	22.4826	22.5196	23.2462	23.0746	22.7318	22.2743	22.8304	22.9379	23.1523	23.9853	24.044	23.3437	23.8284	23.171	22.8604	22.5696	23.1447	23.5033	23.7295	23.3301	22.9623	23.7991	23.6222	25.4858	24.1573	25.7805	25.021	24.8939	24.0572	23.5309	23.8464	24.9706
Annexin A1	ANXA1	24.3253	25.3159	26.1302	25.4472	25.0742	25.3713	26.714	26.4111	25.0016	26.158	26.3095	26.268	26.6095	25.5064	26.6617	27.1858	26.2383	26.856	24.7836	25.7779	26.4941	27.3544	26.1622	26.8121	25.9193	26.5733	26.475	25.3028	25.8566	26.0842	28.672	28.116	27.833	27.072	26.4086	26.1224	25.4855	24.0751	24.2524	22.9341	23.9482	21.7178	25.0984	24.0239	27.03	27.0637	27.3203	27.3361
Superoxide dismutase [Mn], mitochondrial	SOD2	24.675	23.8234	22.8807	23.933	25.547	23.6343	22.7291	23.9673	22.6704	20.1245	25.0657	23.2336	24.0567	23.9804	22.7067	21.5912	23.4064	23.757	24.7561	24.3154	23.2525	21.5672	23.3699	23.525	25.1125	25.8342	22.9692	24.9944	21.8752	22.1831	23.4471	22.6917	22.3154	22.2244	25.9506	23.4456	24.5486	20.3225	21.849	22.5871	21.9359	22.4518	21.345	21.7018	21.8011	21.1248	21.8331	21.078
HLA class II histocompatibility antigen gamma chain	CD74	22.8121	22.3089	23.9739	23.1149	21.7968	21.4198	23.8142	22.9745	20.4175	24.0081	23.1643	23.8413	22.3085	21.9957	23.9873	24.2405	23.337	22.513	22.3063	22.2025	23.8421	24.357	23.0042	22.3905	22.296	22.9776	22.987	20.2221	22.996	23.2687	24.7064	25.0064	24.7704	23.0777	23.3677	24.7067	22.8938	25.978	25.0981	25.0544	25.0032	24.8789	25.1047	24.7261	24.6917	24.7485	24.4407	24.5937
Glyceraldehyde-3-phosphate dehydrogenase	GAPDH	28.9133	28.6074	29.1544	28.7144	28.0907	28.6936	28.4151	29.0824	28.602	30.5587	28.6954	28.573	28.734	28.6546	29.0562	29.2412	29.436	28.9005	28.9504	28.8884	29.5964	29.4909	29.4391	28.961	28.8851	29.1417	28.9776	28.2627	29.4517	28.7761	29.3122	29.2913	29.2485	29.163	28.6649	29.1192	29.025	29.0543	29.1025	29.9306	29.6898	29.7999	30.4285	30.6178	29.5995	29.9441	30.3005	30.3205
HLA class I histocompatibility antigen, A-3 alpha chain	HLA-A	24.074	24.0371	25.4529	25.1754	25.1213	24.8111	26.2041	25.7094	23.8049	25.0328	24.4067	25.3827	24.6909	24.0238	24.7323	23.9888	24.4246	24.6501	24.5587	24.4318	25.4097	25.0558	24.5927	24.5378	24.7756	24.1343	24.2101	23.3658	25.7745	24.5	24.3994	24.0933	23.1879	24.4281	25.2347	24.9406	25.285	24.7695	25.1621	24.8986	24.9654	24.8989	23.7727	24.2734	24.3425	24.6815	24.3022	23.7896
Heat shock protein beta-1	HSPB1	27.563	23.0402	24.3969	25.5861	25.0885	22.5853	24.2511	25.4205	29.5131	23.9249	27.5994	24.4575	25.1461	23.4053	23.9961	23.224	23.5404	24.2616	27.1246	23.4695	24.5321	24.0797	24.5871	24.8323	24.9345	27.0222	24.8886	26.0593	25.4597	25.048	24.9077	25.0429	24.0024	21.9065	27.8966	25.1846	24.894	25.5478	24.2039	23.8893	23.4897	23.0084	23.2126	23.5776	23.6773	25.1342	24.5257	25.0506
Dolichyl-diphosphooligosaccharide--protein glycosyltransferase subunit 1	RPN1	23.9933	24.524	24.9924	24.5598	24.6309	24.4456	25.2711	24.3141	24.5871	26.0455	23.8724	25.0644	24.7577	24.9957	24.9784	25.1517	24.4991	24.9967	24.3412	24.6375	24.9497	25.4024	24.5081	24.9589	24.2609	24.6685	25.1442	24.0858	25.5812	25.69	24.6193	24.7539	25.2611	24.4354	23.7498	24.9209	24.7205	24.979	24.9014	24.3832	24.746	24.2632	24.9607	25.307	24.7047	24.258	24.7603	24.8225
Dolichyl-diphosphooligosaccharide--protein glycosyltransferase subunit 2	RPN2	23.3253	23.1307	23.1946	23.2233	22.3011	22.6734	24.1366	22.8923	23.8318	23.4926	23.3006	23.3561	24.1438	23.5189	24.1988	24.3425	22.9742	24.4745	22.7261	23.483	23.6933	23.7259	22.8769	24.1264	23.6853	23.2382	23.9524	23.0336	23.231	24.5142	22.8992	23.1715	23.6976	23.0724	23.1688	24.0399	23.6163	23.2195	23.1606	21.5178	20.4914	21.3741	21.9934	21.6858	21.3785	22.4819	21.5652	22.1181
Guanine nucleotide-binding protein G(i) subunit alpha-2	GNAI2	25.1664	24.8785	25.4096	25.5155	25.014	24.5062	25.1635	24.6705	23.4403	25.9548	25.1135	25.3976	24.9356	24.8467	25.1845	25.6939	24.9292	24.8089	24.8474	24.4229	24.5871	25.2663	24.4998	24.4655	24.8261	24.0931	24.3758	22.7216	24.1181	24.0344	24.8019	24.9526	26.1426	25.3063	25.1232	24.6421	24.1209	25.1829	25.3441	24.8218	25.2785	25.412	25.6299	25.7589	24.4538	24.9907	24.6287	25.5302
Histone H2A type 1-J;Histone H2A type 1-H;Histone H2A.J;Histone H2A type 1-C;Histone H2A type 3;Histone H2A type 1-D;Histone H2A type 1;Histone H2A type 1-B/E;Histone H2A type 2-C;Histone H2A type 2-A;Histone H2AX;Histone H2A type 1-A	HIST1H2AJ;HIST1H2AH;H2AFJ;HIST1H2AC;HIST3H2A;HIST1H2AD;HIST1H2AG;HIST1H2AB;HIST2H2AC;HIST2H2AA3;H2AFX;HIST1H2AA	29.8749	26.3711	29.3221	27.4389	24.8041	25.7039	28.3954	27.7268	26.3443	30.1505	29.6928	27.1113	26.8438	27.4513	27.2719	26.8344	27.7391	27.6875	28.9615	28.3506	27.7891	27.6445	28.0823	26.2338	27.876	27.2815	27.8937	25.5429	27.3873	26.1198	26.7904	25.7191	26.5599	27.9608	25.6436	26.1796	27.2566	26.4184	25.8942	30.5489	29.1321	29.8534	30.4011	31.7652	27.1235	30.9813	30.8498	31.8661
Sodium/potassium-transporting ATPase subunit alpha-1	ATP1A1	23.5839	23.2377	23.3197	21.4687	23.0952	23.1179	23.7402	22.231	20.7071	22.5973	23.3793	23.4596	22.3029	23.6358	23.8122	23.8315	22.8272	23.495	23.0481	23.2188	23.6591	23.8414	21.6881	23.1358	22.3064	22.4255	22.3117	22.3255	22.6092	20.8574	22.7339	23.5346	24.2258	23.0575	22.856	23.5922	23.9197	23.8104	23.2663	22.5989	23.2877	23.4735	23.2027	21.1904	22.9413	23.4469	23.3226	23.7134
Arginase-1	ARG1	24.1229	23.8401	23.7848	23.3247	23.9227	22.3367	23.191	24.2979	26.6269	23.0825	24.2141	22.9445	24.4064	21.6887	23.0623	22.5986	24.3961	23.4429	25.6366	21.1075	25.4006	24.1544	25.1717	25.6476	23.5958	25.5798	24.5768	26.091	22.3628	25.1194	23.4801	23.5066	21.9366	22.7787	25.979	25.0503	24.5972	23.0241	22.275	22.4946	23.8057	22.8979	23.9996	24.0986	24.429	23.6129	23.2565	22.1504
Protein S100-A8;Protein S100-A8, N-terminally processed	S100A8	25.5584	25.8877	26.4669	26.3427	26.8977	26.5723	26.745	27.6199	27.628	26.716	27.2186	27.7744	28.0818	27.5669	27.1854	27.5779	27.4779	29.0587	27.3558	26.5656	26.9589	26.9092	26.8271	27.6703	26.2708	26.3848	26.0039	28.3381	24.853	26.4855	25.9969	25.2031	29.5072	25.5867	26.8226	26.4892	29.0132	24.9483	23.19	24.4055	25.089	24.4088	28.3834	24.5907	25.0059	24.3534	24.2612	30.1138
ADP/ATP translocase 2;ADP/ATP translocase 2, N-terminally processed	SLC25A5	25.6315	23.9142	23.768	23.9035	23.6362	23.1183	23.6919	22.9315	24.3414	24.673	23.6379	23.8333	23.7277	23.855	23.5238	23.1314	23.0692	24.2018	21.8697	23.2963	23.7527	23.2316	22.5701	22.9201	22.6718	23.217	23.9475	23.8035	23.7262	24.0341	22.8072	22.8732	23.5106	23.1936	23.0701	23.8637	23.0426	23.7684	23.4378	23.7662	23.9688	23.6566	23.5347	23.8508	23.6183	23.8542	23.6779	24.0819
60S acidic ribosomal protein P2	RPLP2	25.5365	26.2539	26.2002	25.9948	25.5738	26.6985	26.7026	26.3517	26.4468	25.418	25.7478	26.354	26.1683	26.8462	26.4251	26.3305	25.9026	26.0715	25.4612	26.6518	26.2216	26.1584	25.7117	25.5273	26.252	25.5131	26.2449	25.6087	26.3192	26.0525	25.3578	26.3842	25.8337	26.1275	25.1878	26.2789	26.5965	26.7482	26.4046	25.1747	25.5808	25.3568	25.6244	24.7594	25.2825	26.0581	26.0001	25.5458
60S acidic ribosomal protein P0;60S acidic ribosomal protein P0-like	RPLP0;RPLP0P6	24.7279	25.0768	25.2138	23.6588	23.9232	23.6749	23.8117	22.8119	25.109	25.0116	21.9786	22.7749	22.9439	25.0108	25.2442	24.5399	24.3897	24.3224	22.2721	24.9451	24.7301	24.5319	23.7088	23.0345	23.6358	22.5077	23.8215	22.5053	24.826	23.4086	24.5271	24.8285	24.6295	24.5526	21.4399	23.63	25.1077	24.9647	25.1869	25.1425	25.3422	25.3546	25.0872	24.5907	24.8546	25.4389	25.4107	25.7518
Gelsolin	GSN	25.3111	24.229	24.3152	25.9827	24.9516	23.281	24.7007	24.8611	25.9848	23.6392	25.815	24.5905	25.0297	24.4918	24.5262	24.96	24.8702	24.6382	25.0991	23.5295	24.1345	24.6627	24.5337	24.6512	24.3478	24.693	24.2879	23.7788	24.8363	24.2464	25.7369	25.6064	26.3851	25.2198	25.1941	25.1344	23.6013	26.8234	26.7921	25.9448	25.3657	25.7893	25.0704	26.3111	25.3741	25.8099	24.7221	26.0419
Prothymosin alpha;Prothymosin alpha, N-terminally processed;Thymosin alpha-1	PTMA	24.1517	25.0667	25.2045	25.1887	24.8088	24.6281	24.5056	24.242	22.853	23.8742	24.2415	24.9292	25.0603	25.6465	24.6009	24.5641	24.9753	24.527	24.604	24.8407	24.2425	23.7235	24.99	24.3609	27.208	24.6581	24.3094	24.5423	23.2938	23.845	24.0622	23.8859	23.5283	23.28	24.3616	24.3675	24.7366	22.9567	23.4811	22.9292	23.1223	23.3847	22.3553	23.0206	23.9586	24.0389	23.8265	24.0214
ATP synthase subunit beta, mitochondrial	ATP5B	29.4244	28.0955	27.7916	28.0932	28.2344	28.1124	27.6505	28.0115	26.6035	27.5141	27.8779	27.3909	27.4617	28.0798	28.0264	27.678	27.9368	27.8652	27.2219	27.7451	27.5798	27.5343	27.5105	26.8914	27.3217	27.8436	27.8974	27.385	27.9378	27.6006	28.7478	28.3648	28.1693	28.067	27.3033	27.854	27.7886	28.5246	28.1846	28.4141	28.4515	28.3029	28.2134	28.3222	28.2983	28.0637	28.0948	28.1474
Protein S100-A9	S100A9	26.1215	27.609	26.7401	28.2225	27.722	28.0983	28.3974	28.7772	28.5422	27.1445	28.7049	28.8252	29.3498	28.2485	28.3154	28.1997	28.3585	30.3307	28.8782	28.2019	28.7435	28.5841	28.415	29.3601	28.4963	28.1149	27.6371	29.7439	26.5575	28.3797	26.9899	26.8206	30.4086	27.4099	28.6232	28.2554	30.2335	26.8102	24.9261	26.5493	27.0792	25.5447	27.9848	27.3117	27.1369	26.8664	25.9781	29.4701
Alpha-enolase	ENO1	29.1289	28.805	29.7243	29.7854	29.4813	28.8343	29.7925	29.5138	29.4938	29.4066	30.1779	29.6223	29.665	29.2511	30.1078	29.881	30.013	30.0933	29.622	29.0915	29.4412	29.6474	29.5044	28.9405	29.565	30.6245	29.9685	29.3713	30.3028	29.238	30.8549	30.2102	30.026	28.8718	29.9413	29.8042	29.7089	29.8105	29.5261	31.2219	30.2623	31.2286	29.4582	30.3612	29.8405	30.0501	29.8597	29.8465
Glycogen phosphorylase, liver form	PYGL	25.7267	23.4961	23.744	23.2455	23.1043	22.1258	23.7755	22.7955	23.2242	23.4591	23.3241	23.3584	22.225	22.3	24.084	22.9886	22.1983	23.6618	21.7746	21.7446	23.4557	23.2123	22.0099	21.2338	21.4928	22.2472	22.0238	20.3601	21.562	20.3546	22.9376	22.776	22.8528	19.3004	22.3145	23.1015	22.6147	23.657	22.0775	22.586	22.3414	22.3994	22.0202	21.4594	22.0339	22.2162	22.1306	22.0719
Glucose-6-phosphate isomerase	GPI	25.1316	24.7279	25.5402	24.601	23.6525	24.6661	25.3216	24.4503	24.6663	26.6941	24.0169	25.3489	23.9042	24.9558	25.2934	26.0986	24.5951	24.9099	23.6939	24.5843	24.9046	25.686	23.9553	24.1585	24.4431	23.4323	24.6459	23.8514	25.264	23.3869	24.0715	24.7765	25.195	24.6155	23.3455	25.0092	24.6432	25.7845	24.9742	24.5816	24.352	24.3238	25.2884	24.2676	24.8392	24.6588	25.0503	24.9761
Nucleophosmin	NPM1	24.6426	25.238	24.3217	24.3792	25.1555	26.505	26.2415	25.8451	22.8228	22.0296	25.555	26.198	25.7968	25.6211	25.9709	25.6083	25.8063	26.1367	25.762	26.5169	26.0705	25.3785	26.2137	25.9715	25.7207	25.7686	26.8563	25.961	25.7897	26.151	26.1585	25.991	25.1933	25.7085	25.5229	26.1605	26.6297	25.9926	26.3138	24.1089	23.7098	23.5302	23.3931	26.1293	24.7538	25.0341	24.6655	26.0642
L-lactate dehydrogenase B chain	LDHB	26.6437	27.2094	27.0347	26.8218	27.635	27.2865	27.4738	26.8361	24.8207	25.6196	26.5327	26.8088	26.8307	27.4521	27.5235	26.8505	27.1589	27.2009	26.3999	27.3413	26.9934	26.877	26.7685	26.0418	27.0781	26.3775	26.9136	26.6271	26.6019	25.6535	27.5687	27.3496	27.1423	26.6846	26.5813	26.8458	27.5721	27.449	27.159	25.8516	25.8042	26.1081	25.3617	25.976	25.2186	25.7128	25.5568	25.3327
Glutathione peroxidase 1	GPX1	22.8943	22.106	22.2298	23.0184	22.5433	22.5693	22.9474	22.6213	21.0082	21.5159	22.5722	23.5413	22.8318	22.0755	22.7819	23.1685	22.8373	21.9707	23.4837	22.412	22.499	22.8309	22.6483	21.4925	22.8481	23.1151	22.7867	22.4635	22.716	21.5294	23.8835	23.0805	23.7487	21.0666	22.9139	23.2411	22.4336	23.7544	23.4561	24.1018	24.2408	24.3431	23.5744	22.2917	21.4391	20.7756	23.221	23.0067
Protein disulfide-isomerase	P4HB	26.7344	26.1479	26.1261	25.1786	25.4063	25.6815	26.5983	24.4098	26.5696	25.309	25.2416	25.8442	26.0266	25.3875	26.1222	27.1491	24.5464	26.3229	25.6957	25.788	26.2709	27.2445	24.9994	26.2606	25.8777	25.28	27.062	25.3801	28.294	26.721	25.2545	25.7864	27.0453	25.4486	24.0708	26.4716	25.5166	27.4927	25.9339	22.2694	22.5421	21.3166	24.0075	23.725	22.8258	24.2659	22.8525	24.1452
Cathepsin D;Cathepsin D light chain;Cathepsin D heavy chain	CTSD	25.2226	23.6908	24.3235	25.365	24.8872	24.0082	24.3934	24.6551	26.5319	24.8386	25.0729	24.5302	24.882	23.7399	23.8382	24.2955	24.3994	23.8865	25.1239	23.4929	25.3509	23.9345	24.757	24.6246	24.1505	23.9928	24.4872	24.2339	25.168	24.7943	26.1074	25.8875	24.4389	24.675	25.522	23.893	24.9174	24.9076	24.5117	25.1164	25.1197	25.5648	25.2632	25.8938	24.9612	24.5051	24.2183	24.5524
Annexin A2;Putative annexin A2-like protein	ANXA2;ANXA2P2	22.1937	23.8576	25.0372	24.7254	24.5931	22.7294	24.7045	24.4963	26.7813	25.7659	25.2541	25.2382	25.1792	21.2512	24.8032	26.4669	24.476	24.5207	25.8763	22.5887	25.7237	26.4906	25.0044	25.9325	24.3372	26.3135	26.6253	26.734	27.6969	26.8644	25.0133	25.3553	27.8368	26.2539	26.6856	25.7914	25.3039	24.7324	25.3027	24.9242	24.8651	24.5093	26.2549	24.7144	26.3184	26.1733	26.4963	27.619
Calpain-1 catalytic subunit	CAPN1	23.6764	23.63	23.6184	23.5707	23.5451	23.2776	22.8317	23.2322	24.4378	24.102	23.2371	23.0991	23.2093	23.0147	22.9557	22.8504	23.0427	23.5245	23.2922	22.934	23.1216	23.0182	23.1119	23.0634	22.7576	23.6488	22.6521	23.9121	22.3625	23.114	22.9205	22.7655	23.11	22.9359	23.6986	22.8681	23.1104	22.3305	22.34	23.2704	23.3933	23.4686	23.6548	23.1356	23.1899	23.0666	23.3613	23.5569
Tubulin beta chain	TUBB	26.2886	27.8395	28.0696	28.2389	28.3187	27.7574	27.5096	27.2162	25.968	27.0897	26.7047	27.4886	27.917	27.8219	27.8521	27.343	27.0892	28.0127	26.5811	27.4458	27.3958	26.7507	27.2644	26.4011	27.7044	26.1946	26.8331	26.4351	27.5407	26.1615	26.6316	27.4098	27.6451	27.1984	25.6707	27.0221	27.0604	27.5265	27.3234	27.1027	27.2585	27.373	27.7001	26.8781	27.3479	27.5801	27.5649	27.9671
Profilin-1	PFN1	28.8084	29.5285	29.7419	29.2952	29.1172	28.6574	29.2632	28.7433	27.4534	29.7701	29.3046	29.5214	29.2243	29.1311	28.6161	29.3805	28.9761	28.7066	28.9225	28.8826	28.8394	28.608	28.61	28.3808	29.2878	28.6479	29.0576	27.9475	28.7561	28.6499	28.4544	29.0197	29.2905	29.6121	28.4941	28.2435	28.5709	29.0266	28.8068	30.0444	29.7593	29.9364	29.8917	29.8677	29.8737	29.6761	29.1991	30.5897
Heat shock protein HSP 90-alpha	HSP90AA1	27.0401	27.292	27.026	27.2106	27.1106	27.5104	27.1947	27.2677	26.7105	25.9916	26.9776	27.2384	27.241	27.4589	27.2305	27.0238	27.2583	26.8713	26.7726	27.4397	27.0895	26.7201	27.1997	26.944	27.38	27.0162	27.3896	27.4592	27.1769	27.0808	27.3103	27.5506	27.3249	27.3934	27.1973	27.1688	27.6661	27.6223	27.7783	26.4772	26.2841	26.3995	26.2145	26.1215	26.5514	26.3102	26.3663	26.3792
Fumarate hydratase, mitochondrial	FH	25.9392	24.7534	24.5285	24.2958	24.1753	22.104	23.4236	21.1886	23.2186	24.376	21.848	21.7605	21.9268	23.5008	24.0099	23.7505	23.9917	23.9014	20.7476	23.8974	24.2303	23.4572	22.7594	22.1513	22.6937	22.4116	23.0867	20.0845	24.2059	22.6879	24.6837	24.4659	24.7083	24.0426	21.3676	23.1215	23.9049	24.8474	24.379	24.9868	24.8546	24.5153	24.5781	24.1754	24.8146	25.2309	24.9485	25.2401
Annexin A6	ANXA6	26.2962	24.5709	25.8237	26.0081	25.3859	23.6202	25.779	25.7377	20.554	25.9737	25.8996	25.6243	23.6928	24.154	25.8414	26.5731	25.7078	25.2224	25.1416	24.3924	25.6338	26.4031	25.6732	24.4601	24.9185	25.5845	23.9986	21.2331	24.3067	25.2622	25.2391	24.7913	26.479	27.3792	25.6362	24.5208	24.1601	23.6096	25.4986	26.0902	25.4168	25.8968	25.8358	25.8241	25.3555	25.4791	24.3681	26.1473
Heat shock protein HSP 90-beta	HSP90AB1	28.1929	28.7619	28.4368	28.1055	28.4543	29.0797	29.0408	28.576	28.2522	27.3864	28.0633	28.9772	28.6475	28.7323	28.9197	28.7584	28.6345	28.4602	27.9195	29.3879	29.014	28.6938	28.6876	28.528	28.5616	28.2952	29.0193	28.468	29.1428	28.6366	28.5619	29.179	28.7801	28.8258	28.4552	28.6935	29.3365	29.2488	29.2519	27.0653	27.3635	27.0458	27.3049	27.218	27.7362	27.7162	27.7249	27.4868
Pyruvate dehydrogenase E1 component subunit alpha, somatic form, mitochondrial	PDHA1	23.1396	22.8039	22.2526	22.4326	23.0626	23.1504	23.2643	23.2147	20.3604	22.625	23.293	22.5195	22.452	23.1374	23.0417	22.3628	23.0153	22.8759	22.7411	22.8717	22.7458	22.524	22.9923	21.7026	23.2898	22.4941	22.9607	22.7323	22.3789	21.9134	23.7176	23.1805	22.593	22.5842	22.8011	23.2703	23.0239	23.1907	22.6652	22.7019	22.7341	21.9332	23.2139	21.0647	21.8354	22.1728	22.1075	21.6309
Vimentin	VIM	27.431	26.2956	27.3583	27.1097	26.8203	26.0194	28.066	27.3347	26.1805	26.4851	28.5593	27.9341	27.4894	26.4565	28.0753	29.2139	27.2979	27.6515	28.2067	26.6904	28.0266	29.1186	27.5179	27.5806	27.375	28.1145	29.1073	27.3282	30.4037	28.952	29.7611	29.4024	30.009	28.9336	27.033	27.3916	26.4781	28.2418	28.6431	25.1646	25.16	25.1536	27.3388	26.2386	27.6813	28.0147	27.8339	28.1298
40S ribosomal protein SA	RPSA	26.7207	26.7848	26.8244	26.4881	26.63	26.8362	26.3755	26.4035	26.9152	26.1822	25.7022	26.8486	26.013	27.0737	26.7765	26.5239	26.3411	26.4869	25.2431	26.7448	26.236	26.3371	26.0042	25.8568	26.3975	25.7129	26.3278	25.9283	26.5035	25.933	26.268	26.8084	26.5054	26.2942	25.8742	26.3317	26.7822	26.7345	26.9763	26.0334	26.2795	26.1671	26.1844	25.5951	26.0966	26.3666	26.4385	26.2438
Glutathione S-transferase P	GSTP1	28.4721	26.6702	27.7893	28.235	27.6601	27.3645	28.0246	28.0709	28.1072	28.6691	28.6051	28.1948	27.8337	27.7779	28.0455	28.1055	28.4654	28.0372	28.2807	27.5841	27.6768	27.5839	27.7998	27.2165	27.8339	27.8628	28.0021	26.7886	27.643	26.8384	28.5498	28.4193	28.1631	27.7632	28.5157	27.7929	27.4611	28.3722	28.7317	29.9376	29.494	30.2115	29.4753	29.2693	28.3544	27.944	27.9216	28.3698
High mobility group protein B1	HMGB1	25.7503	26.2742	25.4667	25.5722	24.6555	24.7706	25.8074	26.3325	23.0699	24.9774	25.7711	25.8928	24.7829	25.9418	25.4229	24.9096	25.9207	25.3579	24.7305	25.227	25.4661	24.9036	25.291	24.3825	25.0547	26.131	24.7576	24.423	25.8471	24.267	26.0016	25.9509	25.402	25.053	24.6833	22.8369	24.34	25.6992	26.1746	24.2744	24.2686	25.0472	24.7797	25.2851	24.18	25.0203	25.9557	24.5638
Annexin A4	ANXA4	22.4088	21.419	22.3203	22.3795	22.8783	22.3205	22.2615	23.1629	22.4608	21.4339	23.2353	21.2747	22.044	22.0101	22.7167	21.7941	22.2841	22.2215	22.2984	22.1563	22.8629	21.3764	22.3214	22.9746	23.0728	23.0772	22.3719	22.348	23.0003	20.8746	23.1425	22.4023	22.6946	22.2036	23.6825	21.8787	22.143	21.9989	21.1572	22.8493	21.5296	22.83	21.372	21.0511	22.3465	21.7148	21.8066	22.0758
Heterogeneous nuclear ribonucleoprotein A1;Heterogeneous nuclear ribonucleoprotein A1, N-terminally processed;Heterogeneous nuclear ribonucleoprotein A1-like 2	HNRNPA1;HNRNPA1L2	25.6272	26.9798	26.1391	26.248	26.7736	27.2798	26.5339	27.247	25.1952	25.3134	25.4766	26.9463	25.6404	27.1617	26.3603	26.7063	26.774	26.6368	26.1385	27.7864	27.0791	26.4163	26.8738	25.3891	25.483	26.4869	26.3253	26.6971	26.833	25.9273	27.1047	27.3752	27.1502	27.0905	26.1935	26.2763	27.2109	27.1585	27.5413	25.9285	25.9188	25.678	25.5499	25.6233	26.2058	25.8794	25.9445	25.0939
Poly [ADP-ribose] polymerase 1	PARP1	24.5108	24.3015	24.5476	24.7138	24.2853	24.2516	24.8779	24.5583	20.5131	22.9215	24.6055	24.6591	24.1247	24.5705	25.312	24.4322	24.7001	25.1611	24.8848	24.6695	24.9113	24.0537	23.8887	24.3093	24.7477	23.2037	22.9536	20.877	22.3661	23.6714	23.9695	24.7047	23.3323	22.9955	22.4734	23.7806	23.3921	23.0522	23.8098	23.9454	23.6664	23.6132	23.1369	23.1652	20.5356	21.2739	22.2156	20.0659
Leukotriene A-4 hydrolase	LTA4H	25.1754	23.1632	23.8087	23.7972	23.8896	23.8795	24.5077	23.7704	23.7984	24.0699	25.3692	24.2599	23.4936	23.8542	24.5113	24.8804	24.4187	23.9326	25.1794	24.0133	24.2041	24.5815	24.07	22.7968	24.3548	24.8555	23.8519	23.4325	23.9246	23.6753	24.6442	23.8835	25.1516	23.8255	25.4513	23.4405	24.0322	21.94	22.6236	23.9722	23.0543	23.9482	23.7713	24.092	22.6609	23.1965	22.8055	23.9696
Fructose-bisphosphate aldolase C	ALDOC	22.9188	23.9122	23.738	22.2662	22.9957	23.5808	23.7548	23.1225	24.1154	22.1832	23.9134	23.256	23.5561	23.5303	24.1312	24.1747	23.6184	22.7969	22.8431	23.8708	23.7685	23.7671	23.3726	23.1179	23.7156	23.4832	23.4988	22.6373	23.6431	23.0604	23.3108	23.9828	23.8281	23.6571	24.1384	23.7962	24.0574	24.0027	23.7351	22.5231	22.8515	22.7952	22.6549	22.5321	22.7086	23.3298	22.6054	22.9986
Ubiquitin-60S ribosomal protein L40;Ubiquitin;60S ribosomal protein L40;Ubiquitin-40S ribosomal protein S27a;Ubiquitin;40S ribosomal protein S27a;Polyubiquitin-B;Ubiquitin;Polyubiquitin-C;Ubiquitin	UBA52;RPS27A;UBB;UBC	24.9399	27.1149	27.0518	27.164	26.4257	26.3385	26.3645	25.7579	28.3518	25.1711	26.8918	26.963	27.0956	26.8112	26.1897	26.9801	26.7429	27.0008	27.1343	27.0382	26.9599	26.6332	26.989	27.0049	27.245	26.893	26.9427	27.5322	25.9112	26.9103	26.1938	26.497	26.4573	26.2101	26.7507	27.009	27.4158	24.6008	26.4026	25.7909	25.8593	25.5422	26.3801	25.4718	26.5074	25.8141	25.8361	25.5583
Heat shock 70 kDa protein 1A;Heat shock 70 kDa protein 1B	HSPA1A;HSPA1B	27.8756	26.3008	25.8734	26.7818	27.016	25.9792	25.847	26.3181	27.6926	25.068	27.6054	25.4091	26.0436	26.3481	25.8666	25.6549	26.3392	25.973	27.5781	26.3268	25.8427	25.6383	26.3459	25.7527	26.585	27.4721	26.5093	26.5039	26.8292	25.6927	27.8998	26.8969	26.9882	26.0103	27.9518	26.5257	27.0198	26.6291	26.1841	27.2319	26.2062	27.0987	25.6841	26.3206	26.1667	26.0832	26.1438	26.541
Calmodulin-3	CALM3	23.8064	24.557	23.5912	23.4734	22.6213	24.6688	24.9456	23.5162	23.3781	21.0865	24.63	24.5276	24.7168	25.147	24.6877	24.3626	24.6118	24.2507	25.7213	24.4231	24.4282	23.9643	24.0888	25.3701	25.916	23.9528	24.8652	25.1642	22.8938	24.1291	24.3632	24.0783	23.6137	25.0419	23.7566	22.6216	25.0804	23.5036	22.9218	22.2964	21.9575	22.8634	22.054	21.9214	22.661	22.4444	22.1059	22.1542
Thioredoxin	TXN	24.937	25.77	25.8278	25.8248	25.1888	26.2386	26.4782	26.2789	26.6491	23.7999	26.233	25.6893	25.9163	26.3544	26.3714	26.0267	26.8098	25.6067	25.2206	26.0872	26.1474	25.9057	26.1997	26.3065	25.7455	25.9351	25.9338	26.5114	26.4149	25.8333	26.2349	26.2649	26.0364	25.5408	26.9144	26.2808	26.2841	26.3976	26.4455	25.0777	25.0898	25.3626	24.6618	24.8888	25.4816	25.3487	25.298	24.7071
Cytochrome c oxidase subunit 5B, mitochondrial	COX5B	23.0289	23.9804	23.9186	23.3926	23.9507	22.7769	24.1937	23.5395	23.0266	23.3685	23.3417	23.541	23.3575	24.2847	23.8023	23.7663	23.8921	23.8908	23.3502	24.0017	23.2726	23.388	23.3953	23.2332	24.0597	23.4244	23.8548	23.6012	23.7099	23.5811	24.0788	23.9263	24.1959	23.8189	22.7845	23.2273	23.4471	24.0988	23.9065	22.7417	21.8501	23.241	23.0385	22.3536	23.6453	23.615	23.2041	23.7044
S-formylglutathione hydrolase	ESD	23.5423	23.341	23.66	23.0674	22.9125	22.9275	23.1686	23.0512	22.0599	22.8331	23.1831	23.218	22.3962	23.7181	23.1227	22.6914	23.2569	23.0134	21.6461	22.9176	22.3919	21.9229	21.8288	21.7389	23.524	23.0673	22.1517	22.315	22.479	20.825	23.7786	23.3504	22.8104	22.2358	23.4569	21.7994	22.747	23.0025	23.1538	23.7446	23.6808	23.9573	23.0658	22.976	23.7217	23.7208	21.9858	23.2836
60 kDa heat shock protein, mitochondrial	HSPD1	27.6776	27.9061	27.8147	27.4009	27.3142	27.563	27.2971	27.0595	25.4384	26.0784	27.1107	26.9785	26.8479	27.5269	27.6699	26.9812	27.4523	27.4295	26.2637	27.5097	27.1879	26.7749	26.9009	26.3028	27.56	26.8473	27.3513	26.8433	27.7802	27.1198	28.1589	28.0712	27.4248	27.4437	26.273	27.2252	27.6407	28.0104	28.1274	27.1358	27.3865	27.2342	26.7103	26.5233	27.2008	27.4224	27.2862	26.973
78 kDa glucose-regulated protein	HSPA5	28.0551	27.3233	27.6415	26.6656	27.1413	27.0338	28.1173	26.5466	27.7254	27.513	26.8159	27.8475	27.0931	26.9304	27.9498	28.1101	26.3469	27.3901	26.5821	26.9994	27.3605	27.7132	26.3635	26.87	26.7765	26.9091	27.9152	26.7443	28.2291	28.4904	26.8062	27.4828	27.8646	27.6278	26.6632	27.8094	27.3958	28.0012	27.6775	25.9627	26.2851	25.9227	26.9406	25.9683	26.8125	27.4044	26.7593	27.2743
Heat shock cognate 71 kDa protein	HSPA8	28.5445	28.8614	28.603	28.5616	28.7838	28.9655	28.654	28.425	28.8482	28.025	27.8612	28.7171	28.5235	29.0774	28.6326	28.6239	28.4199	28.3787	27.5886	28.859	28.5205	28.4928	28.3624	28.0892	28.2896	28.1664	28.8565	28.5458	29.1281	28.6085	28.3915	28.8522	28.7827	28.8054	27.9524	28.5256	29.0594	29.0226	29.1538	27.9379	28.1761	27.9663	28.188	28.0056	28.3073	28.6119	28.486	28.4884
Medium-chain specific acyl-CoA dehydrogenase, mitochondrial	ACADM	22.4987	23.3364	22.9388	22.8421	23.0332	22.9291	22.511	22.6324	23.2383	22.7963	22.8661	23.3131	23.173	23.4441	23.0718	22.5133	22.6356	22.9221	22.3127	22.7522	22.3377	22.393	22.2728	21.8963	22.6166	22.3097	22.4978	21.7647	22.7136	22.1824	23.0056	22.9544	23.084	22.4683	21.8051	22.8377	22.7516	24.181	23.4722	23.8618	22.8676	23.2654	22.5754	23.6378	22.9156	22.9512	23.637	23.347
Polyadenylate-binding protein 1	PABPC1	24.649	24.9908	24.8475	24.1696	24.5325	24.9613	25.0862	24.7084	25.1897	25.279	23.723	25.3079	24.7196	25.5067	25.0415	25.1677	24.7353	24.7212	22.7003	25.1679	24.9708	24.6125	23.7725	23.8071	23.1243	23.0128	24.1016	23.5076	24.9232	24.2895	24.3065	24.6308	24.6495	24.6352	22.8809	24.6308	25.2613	24.8393	25.2087	25.0643	25.5299	25.287	25.5821	25.3139	25.3027	25.5967	25.6356	25.4947
Proliferating cell nuclear antigen	PCNA	23.1009	24.6979	24.7252	25.1273	24.4551	25.1914	24.8526	25.0073	22.2669	25.0958	22.0298	24.9726	24.0862	25.1275	25.3114	25.3164	25.1321	25.2782	20.9544	25.0742	24.8871	24.9305	24.8235	24.2467	24.6858	23.0755	24.6952	24.0633	25.6213	24.1737	23.2646	25.4372	25.2008	24.8597	21.8026	24.6208	25.7082	24.9781	25.1655	23.6055	24.941	24.728	25.1638	23.9586	24.9404	25.212	25.0726	24.789
Inosine-5-monophosphate dehydrogenase 2	IMPDH2	21.8628	23.8885	23.8394	22.6736	22.6894	24.0858	23.8926	23.1162	21.9987	23.1031	22.0078	23.6539	22.3798	23.4274	24.0814	23.5761	22.998	23.309	21.8736	23.8784	23.7985	23.7904	22.7517	22.5116	21.6232	22.7535	22.6465	23.0291	23.6801	22.5362	23.406	24.1825	23.5924	23.3645	22.9132	23.2529	23.9651	23.7979	24.0958	21.7672	23.5409	23.17	23.4927	21.626	23.478	22.1732	23.5595	23.148
Prolactin-inducible protein	PIP	22.4945	23.251	24.4985	24.1934	24.5145	22.5257	23.1953	23.4671	23.3892	23.5136	24.7777	23.1901	23.3828	22.8965	26.4006	22.2774	23.5892	23.5878	24.6853	20.4168	24.3301	23.8635	23.6767	25.1549	23.3142	24.4841	24.2915	25.6132	21.8555	25.0696	22.9952	22.0892	21.7384	22.7103	25.1358	23.6878	22.9018	21.9595	21.0958	23.4555	23.8573	22.2494	22.6025	23.6107	24.3723	22.7747	22.0889	22.3183
Alpha-actinin-1	ACTN1	22.6222	24.6796	25.0563	23.8036	23.8733	24.1063	25.1749	23.719	22.0477	25.579	22.4424	25.2753	24.8072	24.7244	25.2339	25.7132	23.769	25.2836	22.4203	25.0854	25.3749	25.638	22.4828	24.5954	24.7603	21.5891	22.7959	21.5426	24.7312	21.7527	24.3216	25.9797	25.9572	23.2383	21.576	24.9148	23.6546	26.0749	23.9422	24.0751	24.2523	24.818	25.2945	24.9869	20.0021	22.6887	21.9996	24.2761
X-ray repair cross-complementing protein 6	XRCC6	24.621	24.7338	24.7081	24.7919	24.6139	24.6328	25.1278	24.7768	23.8339	23.7472	24.7647	24.8677	24.616	24.9794	25.1075	24.552	24.9202	24.6686	24.8854	24.8949	25.0079	24.8072	24.9318	24.1464	24.6456	24.6981	24.7329	22.6309	24.6712	23.0818	24.9321	24.8925	24.5127	24.2845	24.368	24.5159	24.7445	24.7437	24.9855	22.3504	23.3085	23.3883	22.6548	22.6964	23.4687	22.883	23.0176	22.3536
X-ray repair cross-complementing protein 5	XRCC5	24.6349	24.936	25.0415	25.1268	24.7453	24.9128	25.0354	24.755	23.648	23.5681	24.6036	24.724	23.5697	25.2708	24.9031	24.9011	25.1262	25.4325	24.2519	25.1757	24.9528	24.5635	24.8452	24.239	25.0972	24.8008	25.0731	23.2232	25.005	24.2395	25.0465	25.0061	24.7593	24.8843	24.777	24.8583	24.9801	24.99	25.1277	24.5726	23.9322	24.9244	23.6908	24.9866	23.6527	24.1815	24.2752	23.6405
Cytochrome c oxidase subunit 4 isoform 1, mitochondrial	COX4I1	23.0758	23.8528	23.4506	23.4428	23.4009	24.0492	23.8503	23.9623	22.7185	23.6719	22.7318	24.0019	23.2054	23.9795	23.5694	23.9603	24.0244	23.7546	23.0472	23.9777	23.4261	23.5751	23.1357	23.1883	23.5117	23.0856	23.7545	23.2945	24.1756	23.5241	24.2192	24.2125	24.1904	23.9621	22.6642	23.2095	23.558	24.7212	24.1016	23.3974	23.029	22.5739	23.3756	22.295	23.151	22.381	23.7163	22.7023
Ribonuclease inhibitor	RNH1	23.4453	23.9308	23.9957	22.6522	22.4236	24.4142	24.488	23.3725	25.9311	24.9024	24.2795	24.0864	23.6882	24.5175	24.6522	25.9926	23.221	23.4861	23.5734	24.0913	24.0784	25.4135	22.7043	23.1864	23.3135	24.1958	25.3383	22.918	27.1564	24.5993	25.0396	25.5525	27.2285	24.6987	24.2839	25.0235	24.0472	27.2521	25.6314	24.8168	24.4692	24.9779	25.4182	24.2339	24.7005	25.7916	25.199	26.6177
Elongation factor 2	EEF2	25.281	25.2642	25.8523	25.0787	25.2437	24.7343	25.2081	24.187	26.9336	26.3113	24.3539	24.6113	24.4528	25.4588	25.5581	25.4325	24.8034	25.5535	24.5432	25.2488	25.4267	25.5316	24.7526	24.4798	24.8965	24.5295	25.0903	24.643	25.4164	25.237	24.5817	25.3587	25.3503	25.103	24.5917	25.1314	25.7299	25.8372	26.1346	25.2493	25.4772	25.3779	25.8406	25.1595	25.8367	26.2159	25.7981	26.0554
Protein disulfide-isomerase A4	PDIA4	24.3452	24.4478	25.1007	24.0306	24.1723	24.4305	25.4219	23.9217	23.6694	25.1872	24.3132	25.6096	24.6444	24.2572	25.1529	25.6376	23.9084	24.7152	23.9911	24.5533	24.7347	25.1632	23.0361	24.6594	24.2868	24.1873	25.7754	23.2617	25.9948	26.4001	24.5625	25.009	25.3446	25.2449	24.0818	25.3207	24.6815	25.5468	25.2402	23.4845	24.0154	23.6593	24.8762	23.9366	24.6651	25.2242	24.3994	25.2849
Translationally-controlled tumor protein	TPT1	21.4859	21.7317	21.0874	21.3952	21.9629	22.6382	22.7527	22.9341	23.4594	22.3008	21.6657	22.818	22.03	22.5056	22.9015	23.0912	21.8794	21.8963	21.5828	23.2154	23.3075	22.7771	22.2568	22.1922	22.2867	21.9677	22.5012	22.2011	23.3999	22.9882	23.1461	23.3902	23.5791	23.417	22.2834	22.5275	23.8112	23.0072	23.9609	21.3626	20.8914	21.4561	21.131	21.7909	21.7565	21.8759	22.4253	22.3183
Plastin-2	LCP1	27.4182	27.2291	28.2223	28.1987	27.34	27.118	28.3034	27.9416	25.7177	28.3175	27.4157	28.1959	27.0127	27.1771	28.1088	28.6989	28.1744	27.6141	27.5442	27.3975	27.9223	28.3799	27.9963	27.4338	27.4153	27.4077	28.2544	26.4864	28.9568	27.6262	28.3348	28.6967	29.6576	29.2494	27.5535	28.3302	27.2553	29.4634	29.3582	27.966	27.8676	27.9284	28.5624	28.1592	27.7925	27.882	27.5887	28.9978
Acylamino-acid-releasing enzyme	APEH	23.3861	23.7485	23.7528	22.7351	23.4301	23.4741	23.5316	22.6144	24.0152	22.4091	22.3427	23.2951	22.9799	24.1828	23.8581	23.5863	22.8419	22.8727	23.1176	23.7668	23.5102	22.9436	21.9938	22.6678	22.8872	22.221	22.4247	23.087	24.0045	22.3081	23.105	23.6766	23.7511	22.9699	23.3831	23.4557	23.1474	24.1678	23.9333	22.3506	23.0074	22.8848	22.8185	22.3714	21.512	22.4202	21.7694	22.8234
Electron transfer flavoprotein subunit alpha, mitochondrial	ETFA	25.7195	24.3249	23.7582	24.3008	23.5417	23.426	22.7671	23.1232	21.4058	21.9808	23.1408	22.5677	22.1091	23.2258	23.4483	23.0773	23.45	23.0093	22.8997	23.1817	22.7496	22.4274	22.5884	21.7341	23.1807	23.5533	23.2335	22.4899	23.3507	21.5749	24.4788	24.0245	23.8421	23.0689	22.2717	23.0629	23.144	23.7116	23.2911	23.8777	24.3305	24.2014	24.0944	24.3846	22.5851	22.1893	21.9842	22.8056
Macrophage migration inhibitory factor	MIF	25.0664	23.8029	24.5521	24.2579	24.4577	25.4329	24.5664	25.7157	22.8692	25.537	24.4364	24.7906	24.2316	24.3689	24.6325	24.5377	24.7219	24.3352	23.739	25.1269	24.4625	24.0319	23.5972	23.8739	23.1536	24.1003	24.2068	23.4047	24.7075	23.3288	24.1837	24.6958	23.9261	23.9731	24.0194	23.3996	24.4389	24.8308	24.7366	26.5735	26.463	26.735	26.3054	26.3365	25.6021	26.3549	26.5556	26.3264
Glucosidase 2 subunit beta	PRKCSH	23.7593	24.3595	24.4083	24.1372	24.7807	25.0116	24.8787	24.4792	23.2195	22.58	23.9895	24.01	24.2684	25.0063	24.9488	24.6494	24.2523	24.735	24.2612	24.9152	24.9824	24.5487	23.5171	24.28	23.7926	24.8316	25.7954	24.3812	26.3488	23.9088	25.6958	25.6205	25.5753	24.7633	24.4694	24.6241	24.8725	25.5395	25.1873	22.6875	23.4071	23.1174	23.4406	23.5923	22.596	23.4752	23.9127	23.9568
Hematopoietic lineage cell-specific protein	HCLS1	22.2264	22.2506	23.1882	22.6128	22.9635	23.4951	24.4786	23.9271	19.2468	21.8341	22.8497	23.4539	22.8031	23.1181	24.0833	24.4281	23.9683	22.8979	23.0797	23.7918	24.2616	24.2987	22.9854	23.0643	23.334	21.176	24.0958	22.3411	24.9206	23.1446	23.9232	24.7594	25.1896	25.037	23.0566	24.0634	23.3994	25.2943	24.4663	22.6821	22.3748	22.4087	23.0586	22.3623	21.7153	22.6236	22.4233	23.549
Cytochrome c oxidase subunit 7A2, mitochondrial	COX7A2	23.0538	23.8634	23.5197	23.7322	23.5726	23.7363	23.4726	23.4767	21.9334	24.2625	22.9309	24.1705	23.1509	23.9755	23.2083	23.5544	23.581	23.3194	22.3708	23.2446	22.5348	22.6562	22.5367	22.3004	25.0805	22.4608	22.9711	22.8677	22.7139	23.1973	23.6185	23.1544	23.5648	23.4103	22.2033	22.7919	22.9457	23.4248	23.5108	24.0498	23.92	23.9756	24.4266	23.9231	24.1585	24.2181	23.8411	24.2796
Alcohol dehydrogenase [NADP(+)]	AKR1A1	25.4739	23.6823	24.0421	24.6684	24.6316	22.9218	23.8916	24.7083	22.7729	22.9888	24.2122	23.3716	23.4343	23.7204	24.4943	23.544	24.8262	24.0533	23.7575	23.0451	23.3651	22.8184	23.9924	21.9686	22.5801	23.8454	23.7061	21.9289	24.4789	21.7341	24.772	24.4201	24.3412	22.796	23.8601	23.2378	23.6537	24.2283	24.0492	26.0291	25.037	26.33	23.1399	24.727	23.4006	23.6839	23.8282	23.8954
Pyruvate kinase PKM	PKM	27.2341	26.4432	27.958	27.5724	27.3564	26.1001	28.2713	27.5359	28.4729	27.2315	27.8898	28.194	27.5876	26.5142	28.2059	28.4638	27.6519	27.4453	27.8726	26.6313	28.0116	28.3826	27.7604	27.0386	27.8434	27.2813	28.2731	26.7188	28.4516	27.7198	27.3581	27.7895	28.6708	26.9274	27.7305	27.7987	27.5593	27.7191	27.3248	26.8904	26.7567	26.7875	27.2247	26.0305	26.8808	26.7214	26.8422	27.3738
Endoplasmin	HSP90B1	27.4296	26.933	27.4069	26.4861	26.4783	26.5542	27.5304	26.31	25.7101	27.364	26.0686	27.6215	26.6017	26.6281	27.6238	28.1017	26.2243	27.0498	25.9114	26.7475	27.0804	27.2139	26.1857	26.4834	26.6749	26.5501	27.4476	24.5599	28.3596	28.5027	26.7994	27.4735	28.1239	27.4931	26.2051	27.3002	26.6182	27.9123	27.8272	26.4898	26.5587	26.3573	27.2043	25.788	26.9768	27.6205	26.9995	27.6784
Heterogeneous nuclear ribonucleoprotein L	HNRNPL	24.6003	25.0232	24.5974	24.9404	25.1812	25.7646	25.3497	25.558	22.1327	24.0653	24.3369	25.2225	24.8417	25.6993	25.3567	25.1605	25.234	25.2744	24.5399	25.7709	25.3521	25.0695	25.3057	25.3823	25.1182	25.0921	25.204	23.0795	25.0954	24.434	25.5349	25.5965	25.2381	25.3023	24.7141	25.1782	25.6516	25.2761	25.5716	25.0318	24.6813	24.7592	24.4828	24.8647	24.3539	22.5401	24.6263	23.9917
Aspartate--tRNA ligase, cytoplasmic	DARS	22.8611	23.4808	23.7904	22.9893	22.4138	23.766	23.5368	23.0482	23.1296	24.1134	22.0142	22.9094	21.5078	23.5661	23.7393	23.5109	23.2736	23.4489	21.1032	23.742	23.7264	23.2015	22.9748	22.2403	22.9009	22.0781	21.3391	21.0137	22.0053	20.7404	22.0331	22.6141	22.3023	22.6619	22.5121	22.7894	23.9576	22.3139	22.8147	21.5695	21.0212	22.3491	21.0484	22.8155	22.507	23.9282	23.1244	23.4845
Junction plakoglobin	JUP	23.6628	24.3042	25.1557	24.9987	25.413	24.6821	24.6133	25.6322	28.3795	25.1402	26.1828	24.3607	26.0539	23.9931	24.5339	24.6216	24.844	25.221	26.6969	23.4686	26.3736	25.5779	26.359	26.8736	25.3575	26.0523	25.9895	27.1718	23.5908	26.8164	24.9297	24.5336	23.3099	24.3549	27.3656	26.9263	25.23	24.4357	23.0139	25.1206	26.3361	24.9386	25.7052	26.7311	26.2239	25.512	26.9335	24.9153
40S ribosomal protein S2	RPS2	24.1504	23.3304	23.3965	23.2997	22.6391	22.0806	22.7349	21.9345	24.9829	24.4724	21.7405	22.953	22.6019	23.2557	23.4784	22.3557	22.0231	23.1627	21.5083	22.8986	23.0816	23.1866	21.9578	21.697	21.1768	21.3437	21.9062	22.0567	22.6679	21.7902	22.2381	22.7578	22.1984	21.9161	20.5713	22.0733	22.2492	23.1455	22.8841	20.7203	21.5596	20.8357	21.6237	21.7658	22.4316	22.7068	22.7875	22.4799
Desmoplakin	DSP	23.3683	24.9295	25.6471	26.0398	26.147	25.3169	25.3956	26.2361	30.4576	24.481	27.044	24.9019	26.761	23.612	25.3866	24.6267	25.4572	25.6799	27.5392	23.4493	26.8024	26.3687	26.8009	27.3824	25.729	26.8557	26.213	28.1956	24.5227	27.4658	25.7795	25.3686	23.9522	25.1007	27.99	27.3671	26.0935	25.0716	23.7276	24.3216	26.1114	24.1953	25.1322	25.6564	26.9108	25.4608	26.2058	23.9989
CD44 antigen	CD44	22.3283	20.9285	21.2841	21.9011	20.0747	21.823	22.2817	22.3141	19.3805	22.091	21.7531	22.6713	21.9198	21.2281	22.6108	22.7212	21.0535	21.854	20.8006	21.6013	22.209	21.5879	21.632	20.7386	21.1149	22.8517	22.6357	20.9333	22.3098	21.9914	23.2224	22.3	21.9822	21.8833	22.0145	22.441	22.0894	21.6176	23.1959	21.0793	20.544	21.2251	21.5045	20.9974	21.1225	20.3578	21.7156	21.608
Histone H1.5	HIST1H1B	23.4034	25.3821	25.3952	26.2583	24.1098	23.6479	25.1526	24.6065	24.6144	24.6588	24.8253	24.5241	25.7454	24.9355	25.6976	25.3263	24.325	25.7482	24.8776	25.2541	25.1128	24.4453	24.9327	25.321	27.9101	24.2471	23.469	24.2145	23.0447	25.6851	23.2728	24.1374	23.5699	24.1966	21.7961	23.8541	24.4379	22.9788	23.3605	22.5513	22.9419	22.9027	24.0174	24.1483	24.3826	23.9409	22.7082	22.9276
Stathmin	STMN1	23.1293	25.5815	25.7015	25.8616	24.7245	25.2823	25.6719	25.8422	22.1039	25.9106	22.9981	26.0523	25.0326	26.0541	25.2829	25.5407	26.0906	25.6108	23.8765	25.4939	25.8068	24.8911	25.7163	25.3168	25.337	23.7187	24.5735	24.1406	25.2449	23.2832	23.5544	25.2007	25.0158	24.7039	22.9679	24.5449	24.9769	24.9646	25.1019	24.5359	25.8127	25.5936	26.0347	23.8649	26.4997	26.1629	26.0004	25.9025
ATP-dependent 6-phosphofructokinase, liver type	PFKL	22.7648	22.2135	20.5106	21.5295	20.9163	22.9525	23.1315	23.3452	21.1277	23.6749	21.7752	23.0635	21.7878	23.0102	23.3032	23.1511	22.6869	23.0899	21.8211	23.1641	22.884	22.5215	22.2888	21.3954	21.695	21.3287	21.9996	20.01	22.3839	20.0024	23.0736	23.1199	23.1771	22.9824	23.1736	22.8784	23.1434	22.7442	22.7079	23.8248	23.4667	23.7577	23.5382	23.353	23.4228	23.4666	23.4196	23.9609
T-complex protein 1 subunit alpha	TCP1	24.0134	23.7185	24.1326	23.6777	23.3143	23.2608	23.7977	22.3818	24.1822	24.0421	22.355	23.1846	22.5423	24.3035	24.2796	23.8995	23.6948	23.8685	21.8181	24.215	23.9638	24.0379	23.1715	21.9692	23.3319	21.9831	23.726	22.8937	23.9238	22.7105	23.389	23.894	23.9477	23.9593	22.7428	23.6248	24.3483	24.3258	24.9451	22.3417	23.3902	23.2074	23.2993	23.3167	23.8552	24.2138	23.6133	24.0663
Vinculin	VCL	23.5825	22.948	23.4163	24.2928	24.4976	22.3607	23.3863	23.4638	24.4578	23.3953	23.0731	23.3963	23.3568	23.4614	24.4573	24.1388	24.2555	24.0261	22.8617	23.5813	24.3769	24.4263	23.6205	23.8442	24.4226	23.5955	22.2817	24.1116	23.8759	22.3965	24.1746	23.8861	24.3532	23.3062	23.309	22.9383	23.8167	24.9079	23.6905	24.6561	24.4241	24.3524	24.451	24.0971	24.4241	24.5652	24.3503	25.0599
Phosphoglycerate mutase 1	PGAM1	24.2112	23.8551	23.1836	23.3799	23.0659	24.3546	24.1447	24.1638	24.6226	23.1495	23.1491	24.3556	23.3889	23.9473	24.2234	24.7825	24.0325	23.8134	23.3639	24.483	24.2959	24.8982	23.9235	23.3864	24.5489	24.3193	25.0296	23.0978	26.1912	24.3779	24.4526	25.1206	26.1268	24.9378	24.2851	25.1187	24.2619	26.5566	25.6394	22.4505	23.4482	22.5908	23.5403	22.8127	22.4084	22.5025	22.7956	23.2377
Regulator of chromosome condensation	RCC1	21.4152	22.5244	21.6539	21.9726	22.0891	22.4265	22.6555	21.9233	20.6926	20.6971	21.1882	22.1319	21.664	22.7174	22.6127	22.071	21.5494	20.7807	21.6178	22.965	22.5528	22.1925	21.9792	21.7423	21.4508	21.413	22.3142	21.5422	22.7829	22.0075	22.6108	22.9685	22.5747	21.8623	22.003	22.5226	23.3349	22.8372	23.478	22.5184	22.7292	23.1405	22.6711	22.5762	21.9178	22.4396	22.0498	22.2597
Nucleolin	NCL	26.8335	27.7191	27.5506	27.2404	27.0929	27.1784	27.6127	27.1806	24.732	26.6709	26.8915	27.3431	27.0832	27.5432	27.5721	26.7145	26.9753	27.3387	26.6835	27.2578	27.198	26.7674	26.7714	26.2173	27.037	27.0116	26.6571	26.6949	26.9903	26.5375	27.4567	27.2255	26.7144	26.8835	25.9651	25.9362	26.7193	26.8979	27.3951	26.5332	26.2767	26.4669	26.2495	26.4905	26.4533	26.8184	26.7887	26.3383
Annexin A7	ANXA7	23.3351	23.287	22.7079	22.6028	23.6727	23.3438	23.1956	22.871	21.7865	22.213	23.1685	22.2135	22.3279	23.076	23.4165	23.1525	23.09	22.6294	22.8239	23.2209	23.035	22.5559	22.9396	22.5324	23.4923	23.1227	22.5884	22.3181	23.3273	21.4862	24.5904	24.066	23.9334	22.6904	23.5824	22.5182	23.0213	23.1919	23.606	23.2841	22.7005	23.1258	21.9375	22.9472	22.3059	22.7584	22.6823	22.836
Proteasome subunit beta type-1	PSMB1	24.503	23.807	23.7463	24.0004	24.1606	24.4212	24.7158	24.7502	23.9131	25.0375	24.389	24.2312	23.2719	24.5704	24.7107	24.4236	24.7538	23.8703	23.9281	24.4227	24.5403	24.0971	24.4258	24.4559	23.0691	24.436	24.0361	23.8797	24.4237	24.1105	24.6346	24.7968	24.6411	24.3862	24.4767	24.4509	24.5039	24.5821	24.6926	25.4024	25.2199	25.0962	25.2818	25.3983	24.5885	25.2443	24.6933	25.2976
Cytochrome c oxidase subunit 5A, mitochondrial	COX5A	22.0627	22.5792	22.5357	22.689	23.2684	23.0984	23.252	22.6758	21.5995	21.6415	22.4844	22.9455	22.7037	23.1205	23.0095	22.9567	22.9468	23.0735	22.2149	22.8984	22.4429	22.5697	22.4624	22.6168	22.96	22.3256	22.9547	23.0998	22.9513	23.2156	23.3366	22.9771	23.2349	23.008	22.0251	22.8473	22.7499	23.5317	23.2584	22.1735	21.8782	22.1849	22.3333	21.8881	21.9296	22.4651	21.8503	22.2523
Lamin-B1	LMNB1	25.9526	26.3818	26.3826	26.4414	26.6865	26.2942	26.8401	26.6753	24.5653	25.0365	26.1223	26.7245	26.1126	26.3639	26.7079	26.9571	26.9147	26.5099	26.1931	26.862	26.8347	26.8945	26.7266	26.3087	26.5755	26.8429	26.4667	25.8499	27.0454	26.092	27.4853	27.2432	27.5706	27.1101	26.4051	26.1616	26.5761	26.5735	26.8969	24.9599	24.9814	25.1878	25.2101	25.0684	25.4906	25.0089	24.8233	25.052
Filamin-A	FLNA	25.5333	27.2565	27.065	26.5773	26.3383	26.3708	26.9335	25.7329	25.6931	27.143	25.7292	27.2064	26.7142	27.0193	27.4789	28.0897	26.0679	27.1191	25.6507	27.1964	27.4587	28.0288	25.6047	26.758	26.9379	25.5994	26.9723	24.0393	29.1121	26.0431	27.0609	27.5693	28.821	27.9601	24.0465	26.6553	26.4927	27.9574	27.5668	26.3475	25.948	26.042	27.4346	26.4018	26.5223	26.9653	26.7586	27.3924
Voltage-dependent anion-selective channel protein 1	VDAC1	26.3073	25.771	25.6909	25.846	25.7402	25.0405	25.0403	25.2544	25.1007	25.6036	25.013	25.2383	24.9806	25.4155	25.3796	24.9141	25.4098	25.2842	25.0275	25.3496	25.2907	24.9226	25.295	24.7701	25.6806	25.4659	25.3094	25.3341	25.0531	25.1842	25.838	25.4085	25.0634	25.5818	25.2316	25.3863	25.3607	25.7035	25.7039	25.9734	25.5956	25.7785	25.4958	25.0613	26.0408	25.7742	25.7402	25.7109
Protein-L-isoaspartate(D-aspartate) O-methyltransferase	PCMT1	23.2533	22.6311	22.2675	22.8088	23.0564	23.0703	22.8117	22.8628	21.7735	23.1825	22.5452	22.5855	22.7522	23.1783	22.705	22.9279	22.6144	22.3236	23.3603	22.7755	21.9774	22.3243	22.0538	21.635	22.6426	22.7489	22.0188	22.2032	21.7784	21.5428	23.0381	22.4736	23.5674	22.3045	22.87	22.1783	22.7587	22.1386	22.9053	24.3091	23.666	23.867	23.5146	23.8795	22.7046	23.2887	22.7424	23.6823
Multifunctional protein ADE2;Phosphoribosylaminoimidazole-succinocarboxamide synthase;Phosphoribosylaminoimidazole carboxylase	PAICS	21.9883	23.7566	23.3797	23.6786	24.1686	24.4158	24.5031	23.7422	22.4913	21.77	22.1518	23.8556	23.0188	24.339	24.6649	23.7557	24.2669	23.9291	21.4157	24.7164	24.1728	23.6649	23.9562	22.2074	23.6635	22.7749	23.4326	23.3923	23.0168	22.4208	23.0902	23.5835	23.4852	22.9017	21.9813	24.01	24.693	23.686	24.1131	22.0576	22.6517	22.4625	21.7577	22.7146	21.4778	22.2433	22.252	22.1086
Ubiquitin-like modifier-activating enzyme 1	UBA1	25.5509	25.3035	25.3097	25.0881	25.1515	24.6264	25.0672	24.5197	25.4772	24.1127	25.2332	24.6461	24.4825	25.1922	25.6523	25.461	25.5952	25.3113	25.2613	25.5033	25.4346	25.3098	25.1393	24.8822	25.51	25.5282	25.4372	23.1417	25.9866	24.9866	25.704	25.774	25.6107	25.5452	25.254	25.097	25.2826	26.017	25.7376	24.6112	24.0841	24.371	24.2469	24.0243	25.0107	23.6162	24.3052	24.4898
Nucleoside diphosphate kinase B;Nucleoside diphosphate kinase A	NME2;NME1	25.0839	24.9212	24.5002	24.7146	24.9151	25.1756	24.6375	24.9813	22.7893	24.789	22.4481	24.7021	24.469	25.3282	25.4115	24.7526	24.6432	25.0173	22.2638	25.1368	25.1232	24.2861	24.0795	23.1925	24.0453	22.7715	23.9541	23.7959	25.3604	23.4279	24.3019	25.1624	24.4177	24.1132	22.2499	24.3482	25.2049	25.3989	24.7941	25.5275	25.8614	25.4415	25.7396	24.592	25.1055	25.9628	25.6867	25.6018
Heterogeneous nuclear ribonucleoproteins A2/B1	HNRNPA2B1	26.6572	27.0577	26.4444	26.8391	27.0946	27.5396	27.3214	27.4893	24.8749	26.2279	26.7193	27.4394	27.4564	27.8067	27.148	27.4522	27.5256	27.1034	27.4306	27.9545	27.6381	27.1607	27.4234	27.3466	27.1282	27.1148	27.167	26.3144	27.7214	26.0557	27.3346	27.7204	27.2387	27.6131	26.6259	26.9654	27.2491	27.4519	27.4288	26.8969	26.7844	27.0785	26.9283	26.5514	27.1078	26.9659	27.5069	27.5617
Cytochrome b-c1 complex subunit 2, mitochondrial	UQCRC2	23.8173	23.9808	23.7857	23.7063	23.5709	23.478	23.2763	23.8437	21.8423	24.3378	22.8393	22.8186	22.7148	23.8025	24.052	23.857	23.9477	23.9233	21.7153	23.605	23.7231	23.4164	22.7046	21.8843	21.8382	22.5786	23.4342	22.1599	24.5041	22.7363	24.7822	24.6733	24.4328	24.0373	21.2458	23.4461	23.3755	24.9471	24.1231	24.3141	24.3998	24.5031	24.4603	24.0481	23.6187	23.6721	23.834	23.5995
Splicing factor, proline- and glutamine-rich	SFPQ	23.1187	23.5778	23.4748	23.5926	23.6546	23.2045	22.838	23.6117	22.5087	22.6276	23.5378	23.0641	23.2906	23.5337	23.7172	23.3017	23.5083	23.4327	22.4613	24.4371	23.1587	22.6999	23.818	22.4092	23.3578	23.7946	23.2252	23.3573	23.8026	22.8571	23.6176	24.41	23.7199	23.8914	23.1488	22.8089	22.7736	23.9532	23.757	23.3512	22.3766	22.5206	22.7141	22.6909	22.0551	22.0557	22.6449	21.8316
Peptidyl-prolyl cis-trans isomerase B	PPIB	24.9724	24.9522	25.4672	25.0851	24.9964	24.4608	25.5785	24.3478	24.6259	25.599	24.425	25.4369	24.8228	24.9605	26.1501	26.3846	24.4952	25.8634	24.3399	25.1311	25.3705	26.1463	24.565	24.7526	24.5779	24.6912	26.0553	23.848	26.7684	26.4456	25.1873	25.4436	26.4683	25.4935	23.5076	25.6617	25.2875	26.0674	26.0721	24.2078	24.1505	23.9278	25.4399	24.4845	24.6299	25.2428	24.3493	25.3728
40S ribosomal protein S3	RPS3	25.1495	25.2579	25.1425	24.7276	24.9231	24.7437	25.5371	24.5297	26.6609	24.5919	24.9417	25.291	25.1224	25.4378	25.517	25.0755	24.7409	25.5139	25.048	25.4867	25.5314	25.4762	24.7224	25.0218	25.1214	24.6966	25.207	25.2132	24.8236	25.4395	24.3966	24.6097	24.4684	24.5706	24.0083	25.3087	25.5278	24.6451	25.062	22.8888	23.386	23.0216	23.0937	22.237	22.347	22.9561	23.3695	23.2683
Adenosylhomocysteinase	AHCY	26.4327	24.8253	24.6877	24.4037	24.5898	24.4021	24.2293	23.7816	24.5922	24.0323	24.2583	23.887	24.0048	24.3958	24.2473	23.8903	24.11	24.3718	23.3939	24.0403	24.0731	24.1176	23.698	23.805	24.583	24.0926	24.5518	24.7779	23.6542	24.2081	24.0365	23.759	24.0506	23.5377	24.4261	24.3219	24.5947	23.7974	23.6034	23.9233	23.9249	23.7451	23.7618	23.2058	23.5292	23.7578	23.9154	23.4486
Cofilin-1	CFL1	27.6378	28.1414	28.8678	28.5709	28.1122	27.9686	28.4233	27.9898	28.0532	27.5641	27.988	28.2074	28.3797	28.5921	28.4386	28.6673	28.1765	27.8788	27.5811	27.9832	28.0758	27.9883	27.5283	27.5561	28.1702	27.4199	28.0305	27.2115	28.9791	27.6037	28.5153	28.5691	29.254	28.8344	27.3786	27.9935	27.9899	28.7862	28.9675	27.939	27.9344	28.0807	28.0223	28.1119	27.9251	28.2935	27.9055	28.5292
Elongation factor 1-beta	EEF1B2	23.9236	25.0441	24.8611	24.2299	24.6132	25.5167	25.1039	24.5428	25.2468	24.782	23.6784	25.2259	24.6833	25.5536	24.9778	24.9758	24.1047	24.4197	23.4372	25.5546	25.3254	24.8965	24.2749	24.6992	23.778	23.0204	24.7607	24.4977	25.0353	24.1564	24.0353	25.0963	24.9278	24.7364	23.4747	24.7999	25.3475	25.2286	25.2452	24.2694	24.2299	23.8901	24.7162	24.0541	24.502	25.1717	24.3943	25.0481
ATP synthase F(0) complex subunit B1, mitochondrial	ATP5F1	22.3459	22.8752	22.2089	22.5588	22.9535	23.0433	22.9444	23.1088	21.9854	22.6351	22.6095	23.3065	22.3372	23.2791	23.0782	22.9984	22.8181	23.0954	21.7422	23.0008	22.5699	22.508	22.7951	22.3506	21.9978	22.6347	22.3925	22.1401	21.6255	22.5888	23.0576	22.0722	22.3284	23.1173	22.3349	22.78	23.1872	22.1319	22.8728	21.8793	21.2672	21.7568	21.3283	21.956	21.9468	21.8834	21.7412	22.0087
Low molecular weight phosphotyrosine protein phosphatase	ACP1	22.8649	22.3568	22.4162	22.4797	22.8114	22.5088	22.52	22.3812	22.3766	20.3918	23.0928	22.2171	22.0479	22.7026	22.5033	22.2457	22.5251	22.2024	22.0371	22.2184	21.8412	22.0472	21.7537	21.4918	21.7456	22.1853	22.2023	21.9911	22.306	21.3085	22.6749	22.4321	22.3067	22.6516	22.0405	21.4558	22.3502	22.2322	22.6282	21.3869	21.1193	21.6523	20.9345	20.8673	21.0004	21.3609	21.2019	20.4051
Acetyl-CoA acetyltransferase, mitochondrial	ACAT1	23.7621	23.8719	23.7641	23.5376	22.8851	23.2133	23.5827	22.4848	21.8035	23.5604	23.451	23.2698	22.7937	23.6132	24.0942	23.4978	22.7596	23.0456	21.6444	23.0014	22.9499	23.4437	22.1762	21.3044	22.5683	23.3104	24.0566	22.4308	25.013	23.394	24.6851	24.4894	24.7168	23.2453	21.2934	23.1866	22.2457	25.2394	24.3964	24.2477	24.7315	24.7309	24.3484	24.0145	23.4342	24.1485	23.2088	23.8579
Zinc-alpha-2-glycoprotein	AZGP1	22.5746	22.3942	23.8183	23.5229	23.4879	21.6804	22.5879	23.7126	24.4867	23.9157	23.6872	22.8941	23.9022	22.021	25.1074	21.1927	25.7371	23.9336	23.8334	20.9469	24.2067	23.1438	23.5323	24.997	23.4387	25.6852	23.7807	25.9056	22.9982	24.5818	22.3497	22.3929	21.1791	21.9199	25.1178	23.7982	24.4063	21.9373	20.3496	22.9646	23.044	22.8957	22.499	23.3171	23.6819	22.8873	23.0753	22.2553
ATP synthase subunit alpha, mitochondrial	ATP5A1	28.0061	27.0219	26.6987	26.6986	26.7591	25.8121	26.255	25.6837	25.9402	25.7775	26.0202	25.7634	25.9276	26.316	26.5155	26.1233	26.236	26.7672	25.9488	26.3133	26.2735	26.3321	25.9749	25.809	26.3285	26.3325	26.3789	26.1562	26.202	26.0781	27.1783	26.5615	26.6924	26.5287	25.981	26.3733	26.388	26.9047	26.4609	25.6938	25.5546	25.4357	25.2947	25.2774	25.109	25.4647	25.3212	24.9845
Proteasome subunit alpha type-1	PSMA1	22.7848	22.1361	22.6383	20.9816	22.0167	23.2309	22.3679	23.8211	23.6659	22.123	21.7498	22.265	21.7672	23.0244	24.0538	23.399	23.4127	23.2061	23.215	23.2735	23.9459	23.1557	23.4272	23.182	23.0346	23.3562	22.4256	22.4846	23.7221	22.6064	24.1372	24.2698	24.2288	23.6487	23.1255	23.0968	23.7538	24.5882	24.3591	23.1608	23.1092	23.0661	22.9356	23.1674	22.7949	22.5111	22.3502	22.6605
Proteasome subunit alpha type-3	PSMA3	24.5244	24.0541	24.1142	23.7843	24.0326	24.0455	23.985	23.6455	23.7285	24.5247	23.6427	23.5737	23.2542	24.0899	24.131	23.7439	24.1008	23.4663	23.4469	23.1786	23.6555	23.5313	23.3931	23.5639	23.3896	23.7664	23.7211	23.9292	23.5566	23.4831	24.1736	23.8549	23.9424	23.6116	24.0582	23.6161	23.7936	23.745	24.0475	24.6434	24.596	24.761	24.0583	24.4214	24.4024	24.5874	24.1559	24.2165
Proteasome subunit alpha type-4	PSMA4	22.0197	22.9443	23.0812	22.9065	22.6811	22.5452	22.5902	22.4036	22.4757	22.0608	22.3419	22.2778	21.9564	22.125	23.174	22.7245	22.8459	22.6732	22.3759	22.446	22.8868	22.5215	22.6274	21.9018	22.249	22.8219	22.8063	23.2533	22.6562	22.7519	23.1767	23.1959	23.0873	22.8177	22.9467	22.6476	23.0658	23.2218	23.5283	22.2366	22.9693	22.704	22.5896	22.2679	21.9963	22.5524	22.5181	22.5327
Moesin	MSN	26.0313	26.2933	26.5195	26.5678	26.1905	25.8985	26.2708	25.8615	25.9936	25.9213	26.1532	26.4566	25.9483	26.0164	26.2837	26.5255	26.0535	25.9306	25.4292	25.9584	25.7169	25.9777	25.8016	25.3468	25.727	26.1003	26.1234	25.2665	25.916	25.5408	26.2037	25.9426	26.418	26.7937	25.5981	25.8454	26.0623	25.7072	25.9085	26.1228	25.7561	26.094	26.4473	26.1265	26.1994	26.1535	25.5451	26.5073
60S ribosomal protein L13	RPL13	22.7133	22.6051	22.6016	22.4578	22.1538	22.6221	23.0168	22.3319	24.1726	24.1802	22.4697	23.2696	22.8828	23.0782	23.1322	22.7198	22.1748	23.1392	21.8507	23.0523	23.0667	22.8976	21.7551	22.5611	22.0824	21.2695	21.7661	22.6326	21.1574	22.2008	21.2464	21.4852	21.6588	21.6146	20.7749	22.0505	21.8433	21.8975	21.5212	21.9642	22.4242	21.2704	22.252	22.1402	21.2153	22.6607	22.2332	22.4642
Protein S100-A4	S100A4	25.4602	25.7038	23.7185	24.1956	24.9643	26.0673	23.8451	24.0808	23.3678	24.7669	25.7017	24.4844	24.3462	26.5035	24.3755	25.5169	23.3552	22.939	25.0944	25.6362	23.38	24.4489	23.132	23.4019	23.8873	24.5296	25.6795	24.6277	26.6342	25.1354	26.5161	24.8166	26.8725	25.4198	24.8396	23.8422	24.9848	25.5195	26.1609	25.4846	23.7179	24.866	25.8509	24.6286	25.5402	25.4519	23.5175	27.558
Polypyrimidine tract-binding protein 1	PTBP1	23.9903	23.9775	24.2785	24.2706	23.6652	23.8498	23.7235	24.0299	22.2705	25.2352	22.6322	23.878	23.3124	24.2268	23.8774	23.8201	24.1957	23.9278	21.1405	24.1319	23.5662	22.9191	22.957	22.6897	23.3897	22.734	23.2532	23.9833	24.0363	22.0751	23.7232	23.949	23.501	23.9363	20.7087	23.25	24.0777	23.5187	23.6966	25.5819	25.4806	25.4033	25.322	26.112	25.4204	25.4973	25.393	25.4251
Threonine--tRNA ligase, cytoplasmic	TARS	23.4885	22.5876	23.0449	22.4096	23.0944	22.828	23.3258	22.6061	23.2005	22.3581	21.5106	22.1737	21.5403	22.561	23.2177	22.808	22.9378	22.1062	21.6273	23.1321	22.6135	22.8082	21.5237	21.1182	21.4738	21.6024	21.3514	20.9261	22.4271	20.6173	22.9357	22.9109	22.7313	22.0367	22.9454	22.0894	23.5018	22.771	22.9075	21.1657	21.3755	21.6746	21.0365	21.0476	21.865	21.9784	21.7176	21.8371
Elongation factor 1-gamma	EEF1G	22.8121	24.5521	24.1686	23.1421	23.5797	24.8962	24.1724	23.8981	25.0606	24.0559	22.7857	23.952	23.6225	24.3673	24.484	24.1035	23.7321	23.6585	22.026	24.6914	24.5327	24.4294	23.8933	23.3407	23.8602	22.1527	23.8875	22.8893	23.9306	22.9744	23.3971	24.2357	24.2264	24.0551	21.9234	24.448	24.8111	24.5269	24.5271	21.6076	23.2737	22.2947	23.4219	22.8523	22.1222	23.7066	23.9858	23.7988
14-3-3 protein theta	YWHAQ	23.7564	24.042	24.3448	24.3821	24.6329	24.6204	24.46	24.4023	24.4238	21.8201	24.5154	24.4162	24.5005	24.5072	24.5307	24.1177	24.4025	24.1233	24.7198	24.7025	24.105	24.043	24.7929	24.2436	24.9233	24.3165	24.6096	24.4391	23.1064	23.6759	24.0198	24.184	23.7534	24.086	24.5891	24.4242	24.8848	23.6408	23.9547	22.9098	22.786	23.3133	23.1763	23.8356	22.3053	22.5405	22.4579	23.0053
Calmodulin-like protein 3	CALML3	24.5757	24.7085	24.112	26.3477	24.1132	24.8465	23.7644	23.9705	28.1149	22.038	24.2717	23.7025	24.6856	23.9173	23.4825	23.7483	23.8071	23.3949	24.686	24.4534	23.992	24.2737	24.1869	24.1281	24.2337	24.4681	23.7878	26.4592	23.3504	24.7927	23.2074	23.5755	23.0206	24.2847	24.6199	24.5773	26.896	22.9057	24.7365	23.3926	23.0498	23.0942	22.8314	23.1152	22.7235	23.1092	22.2986	23.3279
Replication protein A 70 kDa DNA-binding subunit;Replication protein A 70 kDa DNA-binding subunit, N-terminally processed	RPA1	23.5801	23.8873	24.0135	23.0669	23.1242	23.6755	23.0727	23.2831	21.3845	23.9285	23.1119	23.2183	23.2131	23.8155	23.3177	23.2056	23.4376	23.1716	22.6191	23.5598	22.4134	22.9249	22.7117	21.8735	23.0512	22.4357	22.6259	21.9468	22.1138	22.6373	22.6225	22.6125	22.1322	23.2224	22.2418	23.1452	23.7439	22.0315	23.0168	23.8258	23.6671	23.8804	23.2322	23.9402	23.679	23.5204	23.7666	23.6087
DNA-(apurinic or apyrimidinic site) lyase;DNA-(apurinic or apyrimidinic site) lyase, mitochondrial	APEX1	23.8307	23.9776	23.6357	23.6305	23.1354	24.4114	24.719	24.8594	22.47	24.298	24.619	25.1078	24.2029	24.769	24.9868	24.6372	24.9091	24.9163	24.1392	25.0163	24.9998	24.784	24.9546	24.4693	24.9461	25.1911	24.5424	24.0182	24.8657	23.2987	25.3074	25.2727	24.6287	24.0441	24.1915	24.5296	24.2621	25.2517	24.6712	25.6715	24.7324	24.5526	24.5681	24.9993	24.9703	23.5942	24.644	24.3493
Calreticulin	CALR	26.2436	26.6833	28.2434	26.3838	25.6554	26.3386	28.1899	26.5502	24.9743	29.0228	25.5684	28.4008	27.3266	27.1985	27.7203	28.2185	26.1169	28.2975	25.3021	27.2183	28.4351	28.6027	26.1227	27.2742	26.0032	26.099	27.9166	25.4755	28.6783	27.1062	26.7879	28.4195	26.9353	26.9404	25.1114	27.5953	26.5841	27.6526	26.6985	27.1156	27.2392	26.44	27.9264	26.8958	27.4372	28.6042	27.8172	28.5112
Calnexin	CANX	25.7787	25.9995	25.7262	25.5608	25.5996	25.8321	26.3899	25.5526	24.9728	25.4611	25.294	26.0992	25.7048	26.0087	26.3705	26.6574	25.583	26.5835	25.4181	26.1738	26.0681	26.3499	25.3688	25.9228	25.5037	25.7088	26.1055	25.4079	26.489	26.0989	26.2213	26.0668	26.6353	25.7045	25.7685	26.0095	25.801	26.2157	26.3102	25.0137	25.2126	25.1205	25.135	24.7067	25.3048	25.086	25.2116	25.4853
Proteasome subunit beta type-8	PSMB8	22.3291	22.959	22.5804	23.1039	22.8315	23.154	23.3476	23.6319	20.583	23.1056	23.0189	23.4221	22.9772	22.4346	22.9426	23.3128	23.5618	23.3122	23.5382	22.3353	23.4007	23.3645	23.4352	22.8001	22.224	22.6171	23.1182	23.2404	23.0624	22.9012	23.4738	23.2868	23.4683	23.292	23.7732	23.1523	23.3263	23.0843	23.4337	22.91	22.8596	22.6776	22.8722	23.3569	22.5174	22.2935	22.6893	21.8674
Proteasome subunit alpha type-5	PSMA5	24.6684	24.1291	24.2695	24.2809	23.8888	24.783	24.4464	25.1692	24.1314	24.6749	23.4339	24.5425	23.9806	24.5817	24.7293	24.4786	24.6975	24.3339	23.7851	23.9175	24.4766	23.6954	23.5376	22.9849	23.9597	24.2581	24.2554	23.9577	24.6047	23.8931	25.0368	25.0011	24.6611	24.9648	24.3327	23.6621	24.6506	24.9195	24.9583	25.6546	25.3313	25.4498	25.4812	25.2866	24.8786	24.8017	24.7637	25.0728
Proteasome subunit beta type-4	PSMB4	23.9411	23.5546	23.8552	24.0314	24.0317	24.2867	24.1266	24.3787	23.7332	23.21	24.05	24.4529	24.5412	23.632	24.2612	23.9949	24.2535	23.4256	23.8178	24.0207	24.0243	23.4085	23.6852	23.8738	22.8623	23.6453	23.7613	23.7897	23.1058	23.3594	23.9274	24.107	24.5393	23.8673	24.299	23.9464	24.3465	23.9767	23.8386	23.8117	24.0842	23.975	23.8206	23.9631	24.1865	24.2073	23.6651	23.9576
Proteasome subunit beta type-6	PSMB6	21.1679	22.2024	22.2258	21.1616	21.9829	22.2609	21.624	20.9029	22.5123	20.1098	21.0639	21.6424	22.1472	22.6271	21.7467	21.3097	20.7311	21.6142	21.9238	21.8671	21.5267	21.2653	20.5865	21.8119	21.5143	21.3548	21.9395	22.6173	21.8909	21.7141	20.8724	21.5411	21.3747	20.7073	21.5723	21.4965	21.6616	21.6372	21.8079	21.9807	20.222	21.1522	20.5505	19.8364	21.0238	20.6291	20.6318	20.5482
Tripeptidyl-peptidase 2	TPP2	21.435	21.3292	22.0964	21.1598	21.7463	20.4523	22.5143	21.8337	21.0658	22.266	21.2219	21.8806	22.1171	22.3461	22.9026	22.3907	21.7906	21.7796	20.0549	22.1073	22.4109	21.8538	21.3539	21.6323	22.3559	20.2916	20.9753	20.7286	20.9441	19.9808	21.2648	22.3008	21.9414	21.4499	21.52	21.8921	22.0776	22.5619	22.748	21.8075	21.6481	21.7738	21.4317	21.45	22.5125	21.8836	21.7575	22.0178
Tyrosine-protein phosphatase non-receptor type 6	PTPN6	22.8268	22.3368	22.5977	22.1818	23.0896	21.33	22.4487	21.9047	19.5133	20.9124	22.1788	22.1353	22.3081	21.462	23.4503	23.8148	21.9251	23.1813	22.5895	22.7375	22.3603	23.2376	21.4439	22.512	22.3925	22.7101	23.5739	21.1944	24.3252	22.2672	23.2893	22.687	24.5741	23.7877	22.0853	22.3091	22.1771	24.427	24.2592	22.6947	21.9875	21.6493	22.2548	21.657	21.4364	22.1058	21.7325	22.7991
Transketolase	TKT	26.4512	26.3097	26.1012	26.1198	25.8006	26.1786	26.3092	26.2534	24.8982	25.8898	26.7513	26.274	25.8991	26.1724	26.5567	26.71	26.5367	26.2141	25.5214	25.674	25.9739	26.5786	26.2605	25.5306	26.0167	26.3557	26.1841	25.322	26.3115	25.7301	25.3105	24.9574	25.897	25.1939	25.8782	24.8138	25.8197	23.858	24.3873	25.8662	25.5528	25.9828	26.1461	26.4049	25.4984	25.3206	25.968	26.0489
Serpin B3	SERPINB3	22.4089	22.6431	24.2546	26.0306	24.5917	23.957	23.9339	25.108	29.312	23.0392	25.0338	23.4778	26.3121	21.0751	23.1154	21.5622	23.6771	24.871	24.4906	21.2999	24.927	24.7151	25.2772	25.6476	22.4183	25.6447	24.5167	26.8302	22.3106	25.918	23.8495	24.2688	22.539	22.7765	26.4053	25.8052	27.1202	23.8395	20.0931	23.1815	23.8699	21.099	24.0871	24.3745	23.4968	23.2973	23.3305	21.3245
Endoplasmic reticulum resident protein 29	ERP29	23.6339	23.7567	24.3402	23.3456	23.4826	23.3464	24.9137	23.4949	22.9071	24.7077	22.8003	24.5617	22.5699	23.6068	24.8374	25.5782	23.257	23.6189	22.1322	23.1913	24.4501	25.1403	22.9641	23.0806	22.7174	23.2525	25.242	23.0592	26.084	25.0377	24.4836	25.3623	25.7608	24.0064	22.3408	24.8443	23.6292	25.819	24.9126	23.7392	24.1351	23.0796	25.2311	23.7959	23.5865	23.8358	22.6681	25.1764
Peroxiredoxin-6	PRDX6	27.1911	26.4704	26.2969	25.9701	26.093	25.6844	25.8265	26.1468	25.2678	26.1796	26.3857	25.676	25.1027	26.1588	26.2234	25.7962	26.1976	26.0371	26.0392	25.8455	25.7194	25.0541	25.9559	25.3056	25.5335	26.4811	25.4224	24.909	25.634	24.0815	26.9426	26.4375	26.0891	25.5171	26.711	25.4729	25.9189	25.4162	25.7949	26.6273	26.4765	26.8467	25.763	26.5194	26.6188	26.1188	26.5357	26.4166
Peroxiredoxin-5, mitochondrial	PRDX5	25.1616	24.4661	24.8759	25.2739	24.8008	24.5525	24.9152	25.0809	24.0171	24.852	24.7688	24.9767	24.5327	24.6376	24.7564	24.7127	24.8321	24.9114	24.979	24.3175	24.0592	24.3051	24.195	23.1446	23.3526	24.6783	24.8726	23.625	25.4108	24.3968	25.8537	25.3975	25.2465	24.9707	24.7794	24.4986	24.055	24.9593	24.9028	25.963	25.3503	25.8042	24.8792	25.8534	25.0442	24.8261	24.5329	24.8866
60S ribosomal protein L12	RPL12	24.315	24.735	24.868	24.6264	23.6702	22.6417	23.9119	22.0915	25.3364	24.136	23.1665	22.7765	23.21	24.4866	24.7966	24.3134	23.8852	23.9322	22.3875	24.603	24.6142	23.9918	22.3865	21.8083	23.8595	22.7801	23.2473	22.9704	25.1736	23.0483	24.9044	25.4009	25.2145	24.1456	22.2754	23.8536	24.7348	25.2451	24.9252	24.4459	24.5239	24.6499	24.4364	24.2308	24.7262	25.195	24.7326	24.6
Enoyl-CoA hydratase, mitochondrial	ECHS1	23.9899	22.6325	22.2625	22.3789	22.631	23.2928	23.1454	23.3976	20.8829	23.1325	23.6569	22.6873	22.2478	22.648	23.161	22.4225	22.9188	21.9495	22.3959	22.3023	22.1936	22.1371	21.5706	20.9497	22.0899	22.6799	23.0718	20.967	22.9535	21.5493	24.0688	23.3127	23.3062	23.0463	23.0119	22.6896	22.774	24.0604	23.1964	23.6794	22.9538	22.8384	21.9663	23.0051	21.7943	21.9304	22.6314	22.2963
Phosphatidylethanolamine-binding protein 1;Hippocampal cholinergic neurostimulating peptide	PEBP1	26.6105	25.6177	25.5785	25.3558	25.6541	26.026	25.8266	26.0441	25.035	24.8453	26.08	25.9436	25.2922	26.2993	25.8445	25.6931	26.2304	25.5553	26.8741	25.8329	25.6113	24.9336	25.8607	25.7808	25.3501	26.3405	26.3336	25.411	25.8176	24.6535	26.3194	26.1021	25.4148	25.1803	26.8327	25.2777	25.9448	25.3514	25.6385	25.735	25.4028	25.9934	25.0512	25.2612	25.1536	24.6633	24.9585	24.8887
Protein disulfide-isomerase A3	PDIA3	26.7201	26.9123	27.3744	26.5882	26.659	26.8807	27.4867	26.5241	25.9803	27.7084	26.4148	27.2156	26.8375	27.1049	27.5123	27.7283	26.0828	27.2161	26.4535	26.866	26.7422	27.2527	26.2356	26.6626	26.409	26.5714	27.5537	26.5691	28.1211	27.2755	26.8414	26.9203	27.4944	27.1993	26.4413	26.9565	26.7886	27.1328	26.5674	26.418	26.6046	26.5785	27.0754	26.7544	27.3573	27.4415	27.3282	27.5956
Leukocyte elastase inhibitor	SERPINB1	28.3083	27.7345	28.2998	27.5897	28.5491	27.7456	28.1763	27.69	25.5378	27.1957	27.8665	27.7321	27.3612	27.5543	27.9132	27.2881	27.2976	27.7702	27.3607	27.6834	27.7742	27.6051	27.1089	27.0795	27.5353	27.9843	26.9054	26.5692	26.4207	24.5034	28.7055	27.89	27.5589	26.3089	28.2823	27.1796	27.6489	25.5953	25.3241	27.2602	26.4234	27.1394	25.8077	26.4384	27.2588	26.7258	27.0917	26.6089
Succinate dehydrogenase [ubiquinone] flavoprotein subunit, mitochondrial	SDHA	22.1252	22.8827	21.8929	21.7235	21.8447	22.7893	22.2739	23.0766	19.9797	22.6033	22.493	22.0864	22.0703	23.2215	22.4566	22.314	22.4704	21.7151	22.4907	23.1208	22.1589	21.9014	21.0714	21.5157	21.5076	22.2616	21.3779	20.3182	22.9119	21.589	22.9562	22.6417	22.5866	22.6666	21.2861	21.6069	22.515	22.6907	22.5876	24.0804	23.9578	23.8432	23.6699	23.5779	22.6841	23.5863	23.7184	23.7843
Coronin-1A	CORO1A	22.4233	22.6353	24.3482	24.5454	22.4687	22.065	24.1434	24.151	20.7435	24.1321	24.0936	24.6553	23.6703	22.5374	24.5246	25.2891	24.3752	24.0254	23.3398	22.7623	24.1878	24.8093	24.2343	23.265	23.9517	22.6233	23.0992	21.8466	23.7153	24.4312	24.3737	24.4899	25.6935	26.5536	22.7709	24.0249	22.682	25.0076	25.5642	25.0301	25.1712	25.0602	25.3388	25.4141	24.4366	25.3053	24.9069	25.748
Protein S100-A7	S100A7	24.2795	24.3802	24.3467	24.6546	25.0724	24.4706	24.6651	25.5165	27.9303	23.0807	25.447	23.9026	25.5211	23.0161	24.1001	22.7103	24.572	25.2892	25.5537	22.7559	25.961	24.7721	25.4871	26.0328	23.7021	26.8044	25.5292	27.9065	23.6948	26.44	24.6989	24.552	23.8287	23.6485	26.4829	26.6154	29.0071	24.4529	22.0925	23.0253	24.295	21.9448	24.2258	23.985	23.9204	22.8392	22.8177	22.5183
S-adenosylmethionine synthase isoform type-2	MAT2A	24.4101	24.5298	23.8653	23.7631	23.691	24.5551	24.1005	24.0257	21.78	24.6783	23.5991	23.9705	23.3847	24.2601	23.9813	23.7093	23.6789	23.9058	22.6525	24.5248	23.9126	23.7659	23.2211	23.2728	22.731	23.305	23.6796	22.9187	24.0787	22.235	23.3641	23.7796	23.6646	23.9729	22.442	23.5734	24.5611	23.7885	24.215	24.0762	23.8619	24.092	23.9123	23.3745	23.7268	24.2766	24.2052	23.8289
Carbamoyl-phosphate synthase [ammonia], mitochondrial	CPS1	30.2889	28.0219	26.6326	26.9307	27.2404	25.9719	23.6541	25.418	20.9437	20.1457	26.3475	20.8596	23.1335	24.011	24.4989	20.0865	22.1802	23.9552	24.1958	22.0214	19.7318	19.2492	21.2118	20.2199	21.3837	24.4793	24.6764	26.0392	20.5433	22.651	21.8216	21.7208	24.9568	23.6197	23.6765	24.5289	25.0868	23.7518	19.3159	20.0865	22.2011	20.7126	19.4684	21.3601	18.8579	21.4305	21.8788	20.9095
Cytochrome b-c1 complex subunit 1, mitochondrial	UQCRC1	24.1537	24.3735	23.9653	24.0613	24.431	24.6901	24.6174	24.6191	23.0729	23.4064	23.9043	24.4016	23.9652	25.0472	24.5079	24.3018	24.3742	24.5312	23.6968	24.5693	24.1549	23.7323	23.6156	23.685	22.1531	24.0002	23.9961	23.2021	24.9544	24.0666	25.3641	25.0511	25.0349	24.5301	22.8991	23.895	24.041	25.4766	24.9608	24.2119	24.1812	24.3667	24.0383	24.0962	23.7625	23.6749	23.756	23.8739
Bifunctional purine biosynthesis protein PURH;Phosphoribosylaminoimidazolecarboxamide formyltransferase;IMP cyclohydrolase	ATIC	22.8082	24.6129	24.0102	22.4791	23.1925	24.6972	23.9879	23.7944	22.8666	24.1165	22.2876	23.5962	21.762	24.4071	24.1824	23.3868	24.2317	23.7106	19.3734	24.5821	23.8873	23.2294	21.9719	20.6255	22.0681	20.987	21.9893	21.7499	24.2725	21.8264	23.6731	24.4693	24.0042	23.7886	21.2873	22.629	23.8559	24.4938	24.6248	24.0428	24.5136	24.3515	24.5144	24.2313	23.8633	24.9749	25.3311	24.9086
Heterogeneous nuclear ribonucleoprotein H3	HNRNPH3	23.2081	23.5411	23.2339	23.3304	23.6399	23.8114	23.3105	23.3294	21.6774	22.0082	23.2853	23.1566	23.1112	24.1025	23.3207	22.611	23.1208	22.8574	23.1628	23.4897	23.2575	22.5213	23.0879	22.8554	23.3336	23.0971	22.9018	22.6529	23.264	22.0401	23.9397	23.2165	23.4755	23.0255	23.1536	22.8447	23.2556	22.2176	23.4058	24.1655	23.5149	24.2996	23.0079	23.8926	22.8266	23.3469	23.2933	23.1315
Heterogeneous nuclear ribonucleoprotein H;Heterogeneous nuclear ribonucleoprotein H, N-terminally processed	HNRNPH1	25.151	25.979	25.6589	25.5565	26.0867	26.412	26.3491	26.3742	24.5501	24.13	25.7759	25.9794	26.0811	26.1694	26.2503	26.0437	26.2153	25.7787	25.7793	26.5567	26.4654	25.9784	26.1132	25.8731	26.1379	26.1065	26.1544	25.9136	26.4684	25.8179	26.58	26.4875	26.3906	25.9942	25.96	25.8045	26.1581	26.3148	26.4038	25.1688	25.0851	25.439	24.7748	25.7026	24.721	24.9923	24.764	24.5726
Caspase-14;Caspase-14 subunit p17, mature form;Caspase-14 subunit p10, mature form;Caspase-14 subunit p20, intermediate form;Caspase-14 subunit p8, intermediate form	CASP14	22.1578	22.6933	23.2923	23.4059	23.1981	22.8403	23.2137	24.0489	25.1723	22.4123	24.543	23.456	24.2345	21.8838	23.5046	21.564	25.1913	23.7708	24.3696	21.9399	24.9818	24.1051	24.4126	24.9846	23.702	25.2798	24.3881	26.4386	24.1265	24.9723	23.0225	24.2027	22.3897	22.9861	25.4077	24.5764	24.7988	23.4829	21.2957	22.3272	23.619	22.1244	24.9285	23.1259	24.4999	23.5626	22.7568	21.5988
14-3-3 protein beta/alpha;14-3-3 protein beta/alpha, N-terminally processed	YWHAB	24.5597	24.7565	24.9337	24.5586	24.4763	24.8014	25.0151	24.6315	24.6154	23.5744	25.2604	24.9064	24.7293	25.0328	25.0129	24.8133	24.5878	24.207	24.7466	24.8381	24.4927	24.4419	24.8675	24.6817	25.0855	24.3273	24.4896	23.8996	24.2509	24.0235	24.4759	24.8861	24.9921	24.6433	24.6004	24.7863	24.6417	24.7516	24.409	24.2735	24.3139	24.4129	24.2096	23.9668	23.572	23.8016	23.3297	23.6437
Stress-induced-phosphoprotein 1	STIP1	25.1868	24.4208	24.8641	24.2746	24.501	23.6841	24.1181	23.357	23.4073	24.0842	24.4827	24.4158	23.825	24.8726	24.1108	23.9548	24.0499	23.696	23.5847	24.19	23.632	23.3628	23.0683	23.131	22.8067	24.0811	24.3971	23.8021	24.6444	23.5359	25.0893	24.5612	24.8413	24.4641	24.5456	23.5507	24.0784	24.6182	24.8881	25.7298	25.2269	25.3193	24.825	24.447	24.5251	24.9279	24.1098	24.4914
Peroxiredoxin-2	PRDX2	23.7111	24.0356	23.3412	24.1339	24.1201	24.2383	23.3136	23.3818	24.1717	21.9684	23.6465	23.344	23.7582	24.3346	22.8911	22.2229	23.5735	23.3724	24.0076	24.3201	23.3175	22.9468	23.7196	24.0907	23.3091	23.7322	23.4118	24.6371	22.6424	23.4679	21.8193	21.2088	20.4397	22.9067	24.5167	23.6709	23.7795	23.5726	23.7619	22.9829	22.5033	23.0479	23.1106	23.3136	22.3835	22.2284	22.4183	21.8816
60S ribosomal protein L9	RPL9	23.924	23.7201	23.6321	23.4658	23.6367	22.9994	23.9263	22.6228	24.7285	23.1528	23.3651	23.5666	23.4761	23.8292	23.9649	23.1617	22.9488	23.819	23.3265	23.8187	23.7585	23.6884	22.8589	23.1879	22.6275	22.4785	23.427	23.016	22.8854	22.7719	22.4394	22.9654	22.6608	22.7049	21.6339	23.7336	23.4234	22.8521	22.9714	21.3382	21.9185	21.131	21.5212	21.2189	20.9039	22.1559	21.3436	22.3085
Heat shock 70 kDa protein 4	HSPA4	23.8727	23.6786	23.8635	23.6392	23.9704	23.9245	24.2321	23.4192	24.1098	23.4436	22.5971	23.3965	21.9876	24.1307	24.1542	23.8627	23.6642	23.6225	22.3038	23.9124	23.6357	23.9667	22.9661	22.2419	23.031	23.0959	23.3298	22.5707	23.95	22.704	24.3169	24.4079	24.377	24.231	23.0594	23.3548	24.3497	24.3577	24.9871	22.5122	23.5726	23.7769	23.5057	23.9757	23.7955	24.0345	23.1281	23.2871
Prohibitin	PHB	24.7596	24.5644	23.5659	23.8663	24.1807	23.9636	23.7111	23.6942	22.6275	23.2092	23.5145	23.5095	22.1399	23.9149	24.2124	23.6799	24.2038	24.102	22.7009	24.2106	23.9733	23.6833	23.25	22.8835	23.2019	22.8799	23.1709	22.9702	24.2912	23.5957	25.3376	25.2316	24.8478	24.478	23.441	23.5739	24.3415	25.0283	25.027	24.311	24.3304	24.0562	23.8876	23.5483	23.717	24.0643	23.9824	23.7229
60S ribosomal protein L22	RPL22	24.1678	24.3409	23.8382	23.6115	23.9613	23.6835	24.321	24.0786	24.6626	23.7282	23.844	24.3268	23.9235	24.0396	24.5166	23.968	23.7731	23.7501	23.0234	23.4509	24.2674	23.8822	23.822	23.9032	24.0301	23.4017	23.4482	22.777	23.7976	23.1225	23.1902	23.9363	23.4535	22.9046	22.6415	23.0022	23.2075	23.8092	23.7158	23.2776	23.6938	23.5933	23.6067	23.4232	23.3953	23.6497	23.5009	23.5203
Myosin-9	MYH9	26.1082	25.7418	25.9101	26.3406	25.427	25.1376	26.8379	26.356	27.4771	25.8372	26.7255	26.9223	26.4432	25.9726	27.1398	27.4444	26.37	26.8583	25.5849	26.445	27.0934	27.4837	26.28	26.2147	26.54	25.3846	26.1836	23.706	27.2547	26.235	26.1786	27.1748	27.4313	27.085	25.5348	26.1239	25.8456	27.3507	27.0235	24.706	25.0842	23.9616	25.7837	24.7948	25.0896	25.1769	25.4285	25.8197
Coatomer subunit beta	COPB2	21.8411	22.3105	22.5052	22.0111	22.7812	22.6518	22.564	21.2579	22.9301	22.7227	22.3632	22.3409	22.3219	21.8249	22.5422	22.8645	21.9207	22.2755	22.6097	22.5068	22.5186	22.9348	21.6651	22.6452	22.1407	22.2055	22.8363	22.3433	21.6853	23.0418	21.3158	21.415	21.8232	22.6515	22.6194	22.5499	22.8568	21.5058	22.1047	20.0674	21.6235	20.4846	21.0635	20.5091	20.4536	20.4161	21.0786	21.3763
RNA-binding protein FUS	FUS	24.3044	24.7617	24.171	25.0326	24.9444	25.3113	25.0924	24.7822	21.9625	23.5564	24.3885	24.8449	24.8068	25.4646	25.0544	24.9222	25.0089	25.0394	23.8414	25.5127	24.8701	24.6292	25.0483	24.4582	25.3088	24.7849	25.0748	24.4412	24.9719	24.345	24.984	25.0945	24.9375	24.359	24.9454	25.021	25.2028	24.5707	25.0189	23.64	23.6529	23.0572	24.7906	23.0154	24.0441	23.408	24.0238	23.8306
26S protease regulatory subunit 7	PSMC2	22.6522	22.8226	22.8936	22.6399	22.1692	22.446	22.4367	21.7699	23.4481	20.6994	20.9766	21.4141	21.1453	22.6625	23.1255	22.0388	21.6345	21.9029	21.3576	22.4292	22.0902	22.0662	20.6532	20.9784	20.5568	21.7216	21.8435	21.2913	22.7533	21.3741	22.5023	23.0607	23.3854	22.3137	20.7646	21.9653	22.2293	22.9376	23.2787	22.5024	21.7406	21.474	21.6873	21.1879	20.8213	22.2534	22.6291	22.8998
ATP synthase subunit gamma, mitochondrial	ATP5C1	22.6916	22.9497	22.8	22.9492	21.6527	21.6799	21.5416	21.7499	21.0159	23.3809	21.7294	21.7077	20.9693	21.5176	22.2583	21.6604	21.8674	22.4715	20.5069	21.809	21.6363	21.6814	21.3038	20.5226	21.1746	21.7571	21.5272	20.3103	21.5674	20.8417	22.2336	21.5926	21.8745	21.2025	20.8039	21.5561	21.6126	22.1618	21.3992	23.5171	23.8019	23.6537	23.0812	23.1468	23.2966	22.881	23.0628	22.7069
Transgelin-2	TAGLN2	24.5767	25.1088	24.1993	24.287	25.2522	25.6433	24.688	24.9715	24.4614	24.7233	23.6601	24.9392	24.451	25.4026	25.0135	25.0284	24.9224	24.8501	23.7395	25.6071	24.7546	24.6048	24.6876	24.6221	24.8114	24.9207	25.4716	23.9755	26.1037	23.6012	26.0701	25.4485	25.0862	25.3002	24.414	24.4096	25.1286	25.2231	25.1735	26.0046	25.7399	25.9311	25.8257	25.5921	26.6466	26.5319	26.9794	26.583
Transaldolase	TALDO1	28.3436	26.1578	25.8805	26.063	26.9404	26.2753	26.1236	26.6902	25.352	25.8577	28.1801	26.1935	26.0889	26.9633	26.3834	25.8449	26.3619	26.3423	27.4207	26.3368	25.8096	26.0327	26.0055	25.742	26.5844	27.8009	26.2485	25.5368	26.8904	24.9503	28.1765	27.1214	26.8001	25.7399	28.4683	25.9352	26.4943	25.997	25.9079	27.9349	27.0711	28.1673	26.3184	27.3329	26.1567	26.0617	25.9255	26.4422
Electron transfer flavoprotein subunit beta	ETFB	24.403	23.2246	23.3548	22.9441	23.623	23.3025	23.0945	23.1581	21.4313	21.2825	23.2076	22.3975	22.3384	23.1156	23.4648	22.7224	22.9904	22.928	21.8421	23.3986	22.5448	22.3858	22.8611	21.8213	23.0395	22.8792	22.8361	22.3088	23.2451	21.8839	24.4548	23.795	23.6167	23.0121	22.5702	22.6595	22.9535	23.5072	23.1831	22.8557	22.9186	23.0704	22.357	22.2718	21.9542	21.69	21.8828	22.0193
RNA-binding motif protein, X chromosome;RNA-binding motif protein, X chromosome, N-terminally processed	RBMX	24.6369	24.9733	25.1334	25.0275	24.9325	24.4265	24.6474	24.5063	22.3739	24.6732	24.3435	24.6595	24.5788	25.1257	24.775	24.5285	24.692	24.3519	23.3059	24.4988	24.0861	23.7077	23.5411	23.8465	23.5796	23.3184	23.1227	22.7089	24.2496	22.6701	24.4286	24.344	24.1517	24.0962	23.0804	23.2451	24.0044	23.9923	24.8294	25.924	25.2184	25.3994	24.6477	25.6781	25.1132	25.0096	25.0701	24.7177
V-type proton ATPase catalytic subunit A	ATP6V1A	21.9847	21.4043	21.268	21.9014	20.5619	22.3379	22.9813	22.1725	23.7428	21.7103	21.1747	22.4856	21.6156	22.1165	23.2115	23.537	22.3418	22.3446	21.6335	21.8279	22.3862	22.8894	22.1144	20.2919	20.7202	20.0569	21.0253	21.3694	23.197	20.9219	23.5436	23.4624	24.7051	20.9873	21.4353	22.2615	22.595	23.789	22.6571	21.3444	21.9692	21.8203	23.0072	20.8659	20.5083	22.4671	21.8978	23.0855
Stress-70 protein, mitochondrial	HSPA9	26.1516	26.0969	25.5662	25.2831	25.7824	26.0643	25.6383	25.3146	24.054	24.6324	25.0386	25.261	25.1159	25.8881	25.9983	25.5605	25.1462	25.4372	24.3168	25.8045	25.3049	25.5112	24.9694	24.1095	25.3757	25.0975	25.8255	25.3294	26.2849	26.1265	25.8245	25.9948	25.8732	25.8589	25.0862	25.653	26.1498	26.259	26.3484	25.0319	25.3207	25.1665	25.2746	24.9479	25.2783	25.8362	25.5932	25.3907
Eukaryotic initiation factor 4A-III;Eukaryotic initiation factor 4A-III, N-terminally processed	EIF4A3	23.0677	23.3609	23.2081	23.2689	23.4458	23.1247	23.1263	22.9309	22.232	23.8443	23.0339	22.6386	22.5836	23.1008	23.2744	23.318	23.2796	23.0445	22.3849	23.4582	23.1127	23.0143	22.9109	22.2667	22.9894	22.9347	23.1878	21.9709	22.2838	23.0014	23.0825	22.5119	22.4513	22.952	22.2588	23.0106	23.3542	22.2346	23.1496	23.5959	23.4773	23.5675	23.32	24.2977	23.4129	23.0853	22.9191	22.858
40S ribosomal protein S19	RPS19	24.6551	24.5111	24.3394	24.2393	24.2889	24.4358	24.5025	23.9102	24.5021	23.5031	22.9264	24.0749	23.1674	24.2844	24.4632	24.3253	23.8688	23.5871	22.784	24.067	24.1293	23.5368	23.1251	22.8239	23.0435	22.8587	23.1261	23.4379	24.3242	23.3079	24.0276	24.3889	24.5924	24.1134	23.2048	23.4852	24.4477	24.6696	25.2035	23.4534	23.8718	23.9368	23.7491	23.7939	23.6178	24.0368	23.9394	23.856
Dolichyl-diphosphooligosaccharide--protein glycosyltransferase 48 kDa subunit	DDOST	24.0667	23.576	23.7876	23.3571	23.2513	23.3835	23.2553	23.0017	23.2912	24.443	23.1201	23.3241	23.2803	22.764	23.4081	23.5166	22.6532	23.6745	22.5908	22.9318	22.8577	23.5561	23.2407	23.5413	23.3144	22.9131	23.181	22.4703	22.7581	23.3637	22.1422	22.2459	22.7562	22.6074	22.7764	23.3431	23.0087	22.5219	22.1685	21.6505	22.6848	22.1065	22.6813	22.7493	22.6944	22.6843	22.7337	23.3559
Acidic leucine-rich nuclear phosphoprotein 32 family member A	ANP32A	24.3142	25.4718	24.8849	25.1597	25.7797	25.5972	25.3559	25.048	22.9424	22.6383	25.2154	25.304	24.9425	25.2736	25.3283	25.1563	25.2455	24.8388	24.8604	25.3789	24.5435	24.9406	25.1477	23.7436	25.2993	25.6204	25.4106	25.1042	25.2399	24.2167	26.3577	25.5956	25.5889	25.3816	25.5728	24.8539	25.3887	25.535	25.8284	23.9985	23.484	24.6479	22.9762	24.1621	23.5437	23.8161	23.6676	23.4929
Macrophage-capping protein	CAPG	23.4097	21.567	22.6274	23.989	23.2679	21.7909	23.9572	24.4523	23.6718	23.9391	24.2313	22.5856	23.4366	22.2776	23.5227	23.8929	24.1946	23.3353	23.4863	22.7247	23.8758	24.0593	24.5268	24.2012	23.3412	24.4476	26.0798	22.9573	27.1364	24.5911	24.4673	23.7154	25.6688	24.9537	23.4592	24.2816	22.8182	26.029	26.4093	24.9407	24.5283	25.4734	24.815	25.2914	22.8618	24.1008	23.5889	24.7754
T-complex protein 1 subunit zeta	CCT6A	24.1413	24.7525	24.9262	24.6477	24.9026	24.2773	24.6182	23.4841	24.5097	24.1174	22.6129	24.3772	22.8948	24.7416	24.8121	24.1226	23.9288	24.0121	21.9345	24.4447	24.4743	24.4311	23.3749	21.9718	22.1209	22.4691	23.9785	22.2357	24.3892	21.7756	24.6181	24.7624	24.9005	24.7673	22.3632	23.9363	24.508	25.1121	25.3829	22.9379	23.4425	23.491	23.7228	23.4354	23.905	24.4405	24.068	24.0478
Malate dehydrogenase, cytoplasmic	MDH1	25.4505	24.8231	24.6559	24.6648	23.6291	24.2413	24.3333	24.7649	24.2603	24.8893	22.9857	24.1083	23.9879	24.7784	24.5414	24.7532	24.8909	24.5005	23.2353	24.4938	24.3425	24.469	24.0968	23.6743	24.2372	24.8111	24.783	23.2661	25.3985	23.1583	24.786	25.2965	24.9586	24.8475	24.2687	24.6486	24.8334	25.957	25.7674	25.1184	25.4242	25.3449	24.9505	25.4165	24.7197	25.2034	25.2735	25.2781
Malate dehydrogenase, mitochondrial	MDH2	27.0335	26.343	26.0504	26.3904	25.9127	26.0532	25.3791	26.0187	24.7828	27.0039	25.6642	25.7767	25.7156	25.8366	26.1443	25.9007	26.2756	26.0938	25.3234	26.1372	25.8963	25.7793	26.3987	25.0995	26.2023	26.106	26.0332	25.9838	26.1752	25.0804	26.8578	26.5736	26.1358	26.2092	25.2568	25.9992	25.8527	26.6442	26.0937	26.7687	27.0455	26.9627	26.7921	26.8947	26.5178	26.4671	26.7782	27.1472
Trifunctional enzyme subunit alpha, mitochondrial;Long-chain enoyl-CoA hydratase;Long chain 3-hydroxyacyl-CoA dehydrogenase	HADHA	23.7374	23.6734	23.8056	23.5615	23.2056	22.8164	23.8411	22.6401	22.9344	25.1359	22.3268	23.3589	21.5997	23.5034	24.5086	24.0604	23.3868	24.2735	21.2632	23.5415	24.1079	24.3348	22.7886	20.3646	23.2182	21.6724	22.5682	19.4404	22.6784	21.4649	23.994	23.9635	23.9582	23.1262	20.5338	23.1879	23.0218	24.0905	23.314	23.5347	23.4719	23.2132	23.5822	23.6157	23.2286	23.5367	22.6058	23.0431
Lamina-associated polypeptide 2, isoform alpha;Thymopoietin;Thymopentin	TMPO	24.5115	25.2689	24.6455	25.2633	24.6083	25.0595	24.5639	24.736	21.1648	23.862	24.4036	24.9169	24.7197	24.6614	24.8608	24.7291	24.8955	25.4833	25.4082	25.3601	25.0805	24.7538	25.0307	24.4798	25.2499	24.5971	24.663	22.7099	25.0538	23.6281	24.5713	25.3031	25.015	25.2805	23.2624	24.3306	24.628	24.8617	25.1382	24.5365	24.3155	23.6841	24.7531	25.359	24.4255	24.7406	25.2499	24.5892
Ran-specific GTPase-activating protein	RANBP1	22.1217	23.3378	23.1734	23.2064	23.3839	23.8322	24.0098	23.6605	21.8654	21.5273	22.3622	24.1933	23.7068	23.8473	23.941	23.4547	23.664	23.6983	23.164	24.7891	24.6436	23.957	23.9525	23.2451	23.4395	22.6359	23.3744	23.2301	24.1078	22.8682	23.164	24.6528	24.0473	23.63	23.0022	23.5655	24.1318	24.5761	24.0332	20.7106	22.0434	21.7491	22.566	20.7102	21.9499	22.0533	22.1097	21.6318
Voltage-dependent anion-selective channel protein 2	VDAC2	24.2913	24.1394	24.0687	24.3056	24.4282	23.9919	23.7545	23.8997	23.6794	23.9457	23.9245	24.1837	24.2055	24.1227	23.7785	23.3079	23.3607	24.2797	24.154	24.0005	23.4565	23.007	23.7124	23.5541	23.3494	24.343	23.826	23.9027	23.8908	23.7418	24.9516	24.3635	24.1921	24.2166	24.065	22.9695	23.9516	24.7008	24.032	25.4519	25.0672	25.4694	24.5797	24.5985	24.2317	23.7365	24.589	24.0919
Ubiquitin carboxyl-terminal hydrolase 5	USP5	23.458	22.9831	22.9863	22.8233	23.1485	23.2802	22.5119	22.4444	23.1256	21.7612	22.3055	21.755	21.4461	23.0853	22.869	22.4777	22.6618	22.085	21.6364	23.0724	22.3227	21.7653	21.445	22.2556	22.2255	22.6003	20.7565	22.2892	23.281	19.675	23.2525	23.1336	23.209	22.7621	22.9571	21.0239	23.2711	23.0378	23.4763	22.4461	21.6499	22.1374	20.78	21.6445	21.2254	21.9233	21.4244	21.6478
F-actin-capping protein subunit alpha-2	CAPZA2	24.5543	23.8097	23.0888	23.8996	24.1713	24.0035	23.5128	24.0775	23.5765	23.46	24.5257	23.4772	23.7047	24.1921	23.6558	23.5286	23.9692	23.8207	24.7952	24.252	23.7274	23.4528	23.8868	23.6371	23.8077	24.44	23.3776	22.0211	23.5249	22.5645	24.0812	23.3694	23.931	23.6702	24.6422	23.454	23.9413	23.1908	23.6431	24.8983	24.3487	24.5891	23.9242	24.9504	24.0056	24.6203	24.2057	24.5164
F-actin-capping protein subunit beta	CAPZB	24.322	24.0871	24.3801	23.9743	24.0472	23.8595	24.324	24.0529	24.7325	24.1472	24.4506	23.8193	23.3734	24.3863	24.7781	24.6833	24.7398	23.9186	23.5252	24.4192	24.2431	24.5668	23.5388	22.9582	23.8693	23.652	23.8397	23.3276	25.0802	23.1342	25.2351	25.2203	25.4996	25.4551	24.3688	23.9161	24.6896	25.4541	25.4996	24.8746	24.4558	24.8502	24.0683	24.0734	24.1011	24.1493	24.1091	24.3827
ATP synthase subunit O, mitochondrial	ATP5O	23.5719	23.7087	24.0299	24.0279	23.0378	22.5599	22.9061	22.5609	22.3017	24.7137	22.8483	23.5715	22.7139	23.2502	23.4714	22.992	23.5005	23.58	22.1697	22.9041	22.9948	22.4116	21.5353	22.6727	22.7292	22.095	22.0321	20.5856	23.0014	22.2653	23.3707	23.6232	23.4306	22.9032	20.7682	22.0133	22.8371	23.85	23.2689	25.3845	25.4314	25.4587	25.0194	25.0321	24.8429	25.2089	25.3022	25.1131
Prolyl endopeptidase	PREP	21.6319	21.5879	21.7564	21.3808	21.5135	21.6423	22.2675	21.2732	22.6417	21.0667	21.6156	21.1076	21.3922	21.9734	22.3892	21.9203	21.5401	22.0352	21.6171	21.6589	21.8022	21.8015	21.4126	21.1926	21.4431	21.3642	21.4916	20.8981	21.2576	20.6427	21.5655	22.3408	22.3163	21.4192	21.1462	20.9839	21.4813	22.4722	21.9141	21.5044	20.6098	21.3495	19.89	21.2184	20.7549	19.5247	20.1383	21.0185
T-complex protein 1 subunit epsilon	CCT5	23.7865	24.1062	24.2499	23.9499	24.2361	24.2937	24.0712	23.2136	23.9374	22.4428	23.376	23.679	23.1313	23.9534	24.1403	23.5689	23.8037	23.8894	22.7554	24.0984	23.4742	23.4586	23.3695	21.6878	23.2514	23.0363	23.4625	23.5403	24.3595	23.1962	24.2896	24.6919	24.6868	24.1819	23.2076	23.6561	24.2205	25.2588	25.0015	22.7399	22.5845	23.3171	23.3179	22.2991	22.4101	22.7804	23.5828	23.6598
Isocitrate dehydrogenase [NADP], mitochondrial	IDH2	25.4607	25.4347	25.4553	26.0521	24.8257	25.0413	25.1386	25.3547	23.2336	26.0051	22.4536	25.2967	24.5817	25.0335	25.5091	25.3536	25.5598	25.9074	24.3622	25.4178	25.5352	25.2693	25.175	24.8139	25.364	23.5404	23.9694	22.7079	24.9811	22.172	25.8661	26.0022	25.4699	25.3615	22.1972	25.1963	24.7657	26.0817	25.5567	26.0008	26.1607	26.12	25.8067	25.3438	25.3537	25.257	25.3632	25.0399
4-trimethylaminobutyraldehyde dehydrogenase	ALDH9A1	26.2007	23.8426	23.9756	23.9539	23.879	23.1051	23.0134	23.4456	23.8736	23.3036	24.392	22.5843	22.9698	22.9115	23.1284	22.7323	23.254	22.6952	24.1937	21.9979	22.6446	22.6651	22.8646	22.7783	22.6557	23.3868	23.2613	23.6842	22.714	23.0028	23.2156	22.7629	23.4933	23.1663	24.0922	23.4031	23.0351	23.1126	22.8433	22.995	22.9163	23.1558	22.7691	23.3122	22.9914	22.4761	23.805	23.6933
T-complex protein 1 subunit gamma	CCT3	24.5084	24.7578	24.826	24.7339	24.8746	24.3509	24.4668	23.9319	24.2604	24.0568	23.5949	24.3384	23.519	24.7627	24.4924	24.3957	24.2041	24.3491	22.7639	24.3739	24.2556	24.0784	23.014	23.6372	22.6161	22.773	23.6666	23.6113	24.7839	22.9411	24.4774	24.7598	24.7831	24.1329	23.2415	23.7924	24.353	25.2955	25.2054	23.9016	24.1376	24.143	24.0923	23.9398	24.6855	24.9594	24.4714	24.3641
Elongation factor Tu, mitochondrial	TUFM	24.5283	24.7954	24.829	24.5498	24.8541	24.9964	25.1058	24.488	23.3397	23.4967	24.0239	24.5969	24.2051	25.2568	25.3302	24.7515	24.8808	24.4002	23.4466	24.6746	24.5051	24.4283	23.8871	23.0398	24.4074	24.3398	24.6808	23.1584	25.2503	24.2945	25.7981	25.565	25.0782	24.7671	23.5095	24.5752	25.0424	25.6137	25.378	24.9767	25.0886	24.9912	24.7734	24.7439	24.8828	24.8091	25.072	24.937
Signal recognition particle 9 kDa protein	SRP9	23.4454	23.0469	23.6051	23.8686	23.8667	24.1348	24.1481	24.3551	21.4726	23.6917	22.6029	24.4097	23.9777	24.1786	24.1373	24.2331	24.3071	24.1499	23.5702	24.4378	24.2092	23.7791	24.2013	24.0378	22.9886	24.174	23.9625	23.7005	24.2856	22.8273	24.3601	24.3581	24.1686	23.7266	23.6261	23.3856	24.055	24.1931	24.2709	24.1374	24.0112	23.9795	23.7049	23.5321	23.5027	23.6886	23.9983	23.5625
Proteasome subunit beta type-3	PSMB3	22.8137	21.8829	21.9404	21.9074	22.7596	22.763	22.3464	22.9633	22.7248	23.1234	22.3429	22.144	21.0708	22.0097	22.755	22.5209	23.4214	22.6036	22.0878	20.9571	22.9193	22.4286	22.8215	22.3726	22.1921	21.7919	22.2825	23.1071	21.8895	21.9555	23.4523	23.0425	23.174	23.3775	22.8661	22.1783	22.5995	23.2075	23.6108	23.6026	23.6284	23.3733	23.3609	23.5699	23.3705	23.7009	23.3249	23.1778
Proteasome subunit beta type-2	PSMB2	22.4966	23.0181	21.9668	22.9069	22.7831	23.4318	23.4025	23.3303	23.3405	22.6224	23.3023	22.6823	22.5076	23.0827	23.1736	23.1287	23.3598	22.3244	23.1382	22.9118	23.2693	22.7678	23.3335	22.7618	22.281	22.9516	22.8998	22.9888	23.1645	22.6528	23.5024	23.5985	23.5795	23.3725	23.4386	23.1049	23.0914	23.4097	23.3679	22.4548	22.6786	22.3993	22.4215	22.4533	22.3248	22.3345	22.5431	22.1142
DNA replication licensing factor MCM2	MCM2	20.7211	25.1733	24.9854	24.3845	25.0144	25.5845	25.2416	25.1425	18.814	25.2984	20.0039	25.0605	24.7251	25.1822	25.5348	25.0664	25.0523	25.2191	19.653	25.6129	25.0457	25.0178	24.6849	24.13	24.2395	19.8666	23.7506	22.3494	24.3813	22.0119	21.2197	25.0762	23.7381	23.6983	19.3877	24.3486	25.2005	24.0126	24.4298	19.193	22.7762	22.2167	23.3074	20.194	22.7259	22.8296	24.3665	22.2053
Very long-chain specific acyl-CoA dehydrogenase, mitochondrial	ACADVL	24.1298	23.8794	23.8977	23.6905	23.7726	20.6159	23.727	20.5513	23.2888	24.1908	21.9621	20.4555	21.3926	23.4684	24.0576	23.7038	23.0085	23.0383	22.0468	23.2441	23.9377	24.0778	22.1313	21.8339	22.2718	22.9391	23.5159	21.1274	24.4411	22.4019	24.6056	24.4367	24.379	22.4846	21.9745	22.7796	22.8236	24.2317	23.4499	24.3077	24.4681	24.3283	24.4214	24.2284	23.3001	23.1599	23.2655	24.2739
Transmembrane emp24 domain-containing protein 10	TMED10	22.6235	22.3725	22.6562	21.583	23.4607	22.8516	22.7283	21.9784	23.3443	21.3897	21.9922	22.1158	22.727	22.6062	23.3673	23.0944	22.5093	22.7085	22.3093	22.9504	23.5128	23.4089	22.2008	22.7576	23.0565	22.284	23.2596	22.9285	23.4679	23.6408	23.2107	22.5955	23.6971	22.6674	22.5689	23.0125	22.6259	23.1257	23.0262	21.7552	21.9053	21.9767	21.9783	22.365	20.755	21.0044	20.0025	21.8525
Rab GDP dissociation inhibitor beta	GDI2	25.3022	25.8723	26.1135	25.7752	25.8117	25.5524	25.6741	25.6014	25.9791	26.3702	25.4079	25.8946	25.3768	25.9766	26.0443	25.9856	25.6803	25.63	25.0892	25.7616	25.627	25.7501	25.5269	25.2062	25.515	24.7344	25.6132	24.6537	25.2896	24.894	25.4317	25.5907	25.9685	25.778	25.7287	25.6737	26.0747	25.5825	25.9168	25.3353	25.13	25.5273	25.4608	25.7491	25.8695	25.5739	25.25	25.8363
Carnitine O-palmitoyltransferase 1, liver isoform	CPT1A	20.4193	21.9781	21.4095	21.4125	21.6491	22.9387	23.022	22.7744	20.653	21.6928	22.1475	22.4987	21.8934	22.7826	23.0114	22.5627	22.9876	23.1077	22.2431	23.3498	23.1923	22.7649	22.9299	22.4861	22.6628	22.0398	22.5236	21.7845	22.5871	22.1579	23.6014	23.2941	22.8298	22.0096	21.9329	22.2476	22.6142	22.0189	21.8316	21.6763	22.1884	22.8795	22.4776	22.2343	21.6784	21.9087	22.2624	21.7839
Hsc70-interacting protein;Putative protein FAM10A4;Putative protein FAM10A5	ST13;ST13P4;ST13P5	24.6157	25.0367	24.4732	24.0321	24.6982	25.0244	24.5876	24.2956	23.4065	22.2264	24.8167	24.3997	24.4137	24.9219	24.386	24.1046	24.4882	24.3581	25.0133	25.0582	24.3767	23.9705	24.4454	24.2039	24.784	24.5035	24.5803	24.2522	24.4101	23.6868	24.8891	24.757	24.2574	24.4039	24.8638	24.4627	24.7437	24.6133	24.9004	23.2558	23.1995	23.6341	22.6248	22.8561	22.4823	23.0699	22.6751	22.5403
60S ribosomal protein L14	RPL14	23.0531	23.5178	23.6304	23.7474	23.1015	23.1693	23.7132	22.9927	23.8987	24.442	23.2746	23.9064	23.3768	23.7151	24.0158	23.1393	22.5212	24.2913	23.1352	23.2124	23.3288	23.2369	21.9484	22.8357	22.8422	22.2577	22.2804	22.612	21.6077	22.7957	21.8907	22.6355	22.2093	22.7264	20.8771	22.6184	21.7908	21.7657	22.1346	21.8019	21.715	21.4663	22.0676	21.2867	20.9446	21.465	20.7864	21.3661
T-complex protein 1 subunit theta	CCT8	25.3717	25.7645	25.7215	25.7044	25.7616	25.8944	25.6341	25.1209	25.4224	24.9674	24.7127	25.251	25.0175	26.0493	25.7577	25.4825	25.4441	25.6638	24.879	25.7706	25.4286	25.4306	25.2076	24.765	25.4081	25.0562	25.2877	24.9166	25.6405	25.0763	25.5659	25.7502	25.6761	25.6526	25.0502	25.5388	26.1295	25.7684	26.2999	24.9247	25.0414	25.2364	25.051	25.0998	24.864	25.4421	25.4001	25.4407
T-complex protein 1 subunit delta	CCT4	23.8318	23.8293	23.7014	23.4138	23.067	21.7187	23.0468	21.6257	24.392	24.0266	22.5984	21.8154	22.3883	23.266	23.5643	22.2473	22.4733	23.6095	22.9641	23.0358	23.2542	23.2403	22.1953	21.6243	22.2504	22.0438	22.9155	21.9507	22.8664	22.0981	22.4338	23.3539	23.0983	22.8878	22.1276	22.7383	23.6044	23.4414	23.3133	20.5191	22.8932	20.44	22.0617	21.0343	21.1139	21.9978	21.6087	21.7305
Annexin A11	ANXA11	20.9855	21.5687	20.2866	21.8121	22.0575	22.0481	22.4263	22.3793	19.9654	21.3714	21.3163	21.9827	21.8086	22.0566	22.5686	22.6111	21.5822	22.2179	22.118	22.2914	22.0676	22.7758	22.592	21.9392	22.2817	22.1587	21.7347	21.1101	22.9039	20.9696	23.3323	23.1295	23.9197	23.1897	22.8873	21.7686	21.586	23.0002	23.2465	21.6739	21.7027	23.1866	22.964	22.5467	22.2168	22.3856	23.4591	22.8711
Ras-related protein Rab-5C	RAB5C	23.0848	22.7136	23.2455	22.6551	22.8281	22.6583	23.2913	23.1146	24.4144	23.634	22.9872	22.5272	22.4851	22.7613	23.1414	21.3625	23.1063	22.8666	22.2693	22.4421	22.8621	23.1383	20.6226	19.5375	21.606	22.2402	22.8727	22.7928	22.6038	22.289	23.2688	23.1588	23.5543	23.3353	22.9435	23.0093	22.7348	22.5624	22.9766	23.1703	22.646	23.1954	23.2302	23.2413	22.6552	22.7162	23.0728	23.7222
Ras-related protein Rab-7a	RAB7A	24.6259	24.3811	25.0473	24.5262	24.551	24.5558	25.1345	24.5872	25.0189	25.087	24.4992	25.2419	24.584	24.578	25.1063	25.2319	24.2202	24.4388	23.6785	24.6269	24.7585	24.7902	23.8682	24.0476	24.1074	23.6614	24.2707	22.9987	24.4084	23.3793	24.6581	24.8054	25.3272	24.3465	24.6118	24.6084	24.6192	24.9505	24.773	24.6741	24.5436	24.8663	24.8668	23.9554	24.6025	24.7033	24.5323	25.1297
Translocon-associated protein subunit delta	SSR4	22.4882	22.6697	22.6356	22.2272	22.2983	22.2617	22.498	22.3297	21.9808	22.8045	21.9987	22.9298	22.5365	22.3967	22.5395	22.8263	21.9326	23.1058	22.3269	22.1965	22.4177	22.8218	22.1553	22.4309	21.6778	22.6168	22.4916	22.8151	23.3069	23.0399	22.2363	22.2014	22.9855	22.4077	22.0493	22.6237	22.2917	22.4073	22.8434	21.83	21.8014	21.1038	22.2379	21.5781	22.0247	22.0411	21.334	21.8128
Peroxisomal multifunctional enzyme type 2;(3R)-hydroxyacyl-CoA dehydrogenase;Enoyl-CoA hydratase 2	HSD17B4	24.3671	22.8537	22.6247	22.7053	23.0721	22.5775	22.6759	22.4006	24.4315	23.0804	22.0628	22.3923	22.6069	22.4545	22.8924	22.7002	21.7753	22.936	22.4481	22.2364	22.6276	22.8577	21.6829	22.4486	22.2662	22.8418	22.9869	23.2524	23.7049	22.9263	21.6274	21.5862	22.792	21.1825	22.2831	22.4288	23.2196	22.5533	21.766	21.9034	22.3072	21.7906	22.8537	22.7471	22.0127	22.4295	21.9573	23.1989
Hepatoma-derived growth factor	HDGF	24.03	23.8665	23.4372	24.0844	23.5417	24.0419	23.8862	24.3132	22.3035	23.1665	24.5246	23.9007	23.7934	23.6296	24.2549	23.9509	24.0942	24.2412	25.0917	24.8619	24.0694	23.8788	24.3358	23.3989	23.9832	24.8901	24.0234	23.0242	24.2274	21.9564	24.8601	24.2828	24.0549	24.0238	24.284	24.2011	24.1629	24.0983	24.2428	24.6606	23.6626	24.825	23.6538	24.8459	24.0577	23.7951	23.9613	23.8904
Heterogeneous nuclear ribonucleoprotein A3	HNRNPA3	24.5011	24.4653	23.6428	23.0228	23.9837	25.1909	24.7988	25.6474	23.1839	24.2231	24.8941	24.8115	23.9595	25.4556	24.814	25.3563	25.4336	24.6517	23.3397	25.748	24.9705	25.1683	25.2247	24.7527	24.6005	23.8802	24.977	20.9285	25.1504	23.5878	24.9948	25.5502	25.4805	25.2001	24.6218	24.6368	25.1171	25.0703	25.5021	25.3865	25.0833	25.6472	24.8515	24.4799	25.4207	24.76	25.7493	25.2265
6-phosphogluconate dehydrogenase, decarboxylating	PGD	23.1819	23.7886	23.4379	23.3986	23.7408	23.914	24.0927	24.205	23.5626	24.5222	23.1948	23.2709	23.6872	24.1035	23.851	23.8476	23.9873	23.1512	23.8337	24.4077	23.5119	23.7448	23.739	23.695	23.5755	23.065	23.6003	23.7184	25.3753	23.3957	24.8262	24.1353	25.38	23.0607	23.9228	23.9201	24.2478	24.2535	24.2614	25.1369	24.8415	25.1551	24.6377	25.1243	23.2298	23.3418	24.4156	25.5008
Heterogeneous nuclear ribonucleoprotein M	HNRNPM	25.5955	25.7225	25.6457	25.8533	25.9619	26.2179	26.0337	26.1725	24.4059	26.1415	25.3155	25.5668	25.6206	26.1947	26.3102	25.8457	26.0359	25.8534	24.3123	25.8076	25.7204	25.3537	25.0733	24.9949	25.5211	24.6677	24.8164	22.7533	25.3092	24.6285	25.9044	25.9105	25.526	25.5833	24.3112	25.2068	25.6541	25.4806	25.7608	26.9739	26.5932	26.9305	26.3549	27.0714	26.3037	26.5643	26.3769	26.4605
Rho GDP-dissociation inhibitor 1	ARHGDIA	23.8756	23.9374	24.4798	24.6037	23.5894	24.7195	24.8794	24.4145	24.1683	23.3215	24.7587	25.1213	25.2537	24.9195	25.262	25.167	24.6317	24.5037	25.2578	24.5974	24.5477	24.6434	24.696	24.5282	24.9242	24.1364	25.2109	24.1224	25.0726	24.6779	24.4621	25.1778	25.3044	24.752	24.1666	24.7788	24.9492	24.9428	24.9811	23.9406	23.6235	22.8348	23.7312	23.443	24.2459	23.7911	23.6507	24.2287
Rho GDP-dissociation inhibitor 2	ARHGDIB	26.5531	25.9413	26.158	26.2752	26.2696	26.3553	26.5412	26.1079	23.5086	25.1719	26.6588	26.4394	26.0899	26.4193	26.4175	26.5633	27.0929	26.4387	26.1191	26.3296	26.4499	26.4833	26.7339	26.226	27.06	26.2033	26.3382	25.2099	26.5815	25.0991	25.7158	26.7539	25.6653	26.4396	26.4651	26.4975	26.3819	27.3293	25.5825	26.035	25.6434	25.7405	25.7635	26.1864	25.4268	25.3647	25.8492	26.1158
Heterogeneous nuclear ribonucleoprotein F;Heterogeneous nuclear ribonucleoprotein F, N-terminally processed	HNRNPF	22.8549	23.8817	23.5258	23.2676	23.7867	24.8383	24.6348	24.3823	22.2315	20.6842	23.6542	23.9459	23.8548	24.9773	24.6852	24.2506	24.1361	23.758	22.884	25.3277	25.2113	24.3077	24.0646	23.9818	24.9191	23.6028	24.195	23.7149	24.92	23.549	24.9006	25.1499	25.0609	24.8721	23.1464	24.0657	24.8866	24.7365	25.4168	21.4214	21.6583	21.66	22.2959	21.5068	20.2605	21.8446	21.0397	19.552
39S ribosomal protein L12, mitochondrial	MRPL12	21.9121	22.9365	22.722	22.2265	22.6628	22.5205	22.1133	21.7104	21.8682	22.0441	21.9622	22.0898	21.7769	22.5824	22.1144	22.0623	21.6849	22.2339	20.9137	22.0867	21.5165	21.819	22.0141	19.5042	19.8447	21.9978	22.7391	22.9662	21.8307	21.9558	22.0527	22.3936	22.0775	22.3711	21.1933	21.4201	22.4457	22.3417	22.4968	22.949	22.6102	22.6546	22.481	22.7442	23.159	23.5615	23.5301	22.6567
F-actin-capping protein subunit alpha-1	CAPZA1	25.5317	25.8272	25.7796	25.9084	25.7268	26.0028	26.5054	26.4059	26.0267	25.6453	26.1004	26.6662	26.1296	26.1846	26.4085	26.6103	26.0419	26.0091	25.9867	26.2944	26.5117	26.4384	26.3168	26.0785	25.9004	25.857	26.184	25.1863	26.683	25.8573	26.4791	26.6311	26.9833	26.8757	26.0049	26.3639	26.0292	26.9087	26.8353	25.6098	25.4498	25.5214	25.6218	25.3771	25.3105	25.5939	25.2156	25.6215
Activated RNA polymerase II transcriptional coactivator p15	SUB1	23.7528	24.0854	23.0918	23.6862	23.8177	23.5007	22.8677	23.8148	22.7729	21.8613	23.6196	23.2659	24.596	24.0039	23.9644	24.146	23.9126	23.0492	24.2611	23.9577	23.4583	23.4241	24.7223	24.034	23.4422	25.2629	24.1426	25.1809	24.2192	24.5632	24.6854	24.6399	25.3094	25.0296	23.4707	24.0319	23.2221	23.8952	25.3784	23.0519	24.3211	23.4842	24.232	25.3005	25.1487	23.6521	24.1414	23.691
UV excision repair protein RAD23 homolog A	RAD23A	22.3895	22.0252	21.7638	21.8166	21.9551	22.2605	21.9581	21.7997	21.9843	22.2494	21.6522	21.9214	21.9163	22.1595	21.68	21.703	21.6882	21.4435	21.6982	22.0229	21.53	21.133	20.9225	21.1278	21.0983	21.2528	21.4512	20.7095	20.8664	20.3279	22.1497	21.4629	21.9546	21.6282	21.7323	20.7899	21.4506	21.7628	21.9258	23.3007	22.4915	23.3256	22.295	22.6276	22.4818	23.2387	22.5578	22.8167
Adenylate kinase 2, mitochondrial;Adenylate kinase 2, mitochondrial, N-terminally processed	AK2	25.6979	24.9701	25.3978	24.9722	24.7079	24.5394	25.0107	25.1762	22.781	26.1606	24.437	25.3249	24.3263	24.8654	24.9492	25.4096	24.7198	24.2797	23.9889	24.4064	24.328	24.9519	24.2944	24.3611	24.1028	24.7468	25.2274	23.7069	25.9087	23.7687	25.4831	25.5477	25.9155	24.0163	24.171	25.5912	24.2799	27.3102	25.5994	25.5594	25.4712	25.465	25.7688	25.0872	24.8327	24.0184	25.6241	25.7153
Alpha-soluble NSF attachment protein	NAPA	22.4071	23.1892	23.158	22.827	22.9931	23.5516	23.5714	23.6022	24.6594	24.2385	21.5167	22.5524	23.0519	23.316	23.4912	23.8972	23.4393	23.0462	21.3924	23.6461	23.3152	23.518	22.8278	22.3626	22.0722	22.3153	23.4152	21.4613	24.5121	22.3587	24.0163	24.1121	24.8792	24.1706	22.7182	22.7115	23.6405	24.8038	24.7009	24.0287	24.0869	24.3882	24.3858	24.8646	23.5386	23.9252	23.5206	23.8612
26S proteasome non-ATPase regulatory subunit 4	PSMD4	22.7457	22.917	22.6313	22.2653	22.4485	22.4984	22.8134	22.456	22.8727	21.879	22.0355	21.9742	21.8971	23.3333	22.9944	22.5346	22.1639	22.2552	21.8319	23.1144	22.361	22.4443	22.4754	19.3751	22.2582	22.1543	22.7472	21.2623	22.8758	21.8918	22.3815	22.8198	22.8913	22.5147	22.3172	22.4304	23.1714	22.794	23.1445	22.1113	22.3648	22.6931	22.4007	22.4751	22.0356	22.6985	22.5786	23.1823
Transitional endoplasmic reticulum ATPase	VCP	25.9715	25.5448	25.3692	25.3061	25.4377	25.5375	25.5062	25.1193	26.5753	25.0999	25.0209	24.8571	24.7402	25.4341	25.6769	25.5176	25.4458	25.3096	24.9059	25.6635	25.3587	25.4742	24.9202	24.7244	25.6152	25.2951	25.2128	24.9503	25.7414	25.2632	26.01	25.9755	26.2199	25.8397	25.6461	25.5465	25.9642	26.1894	26.402	25.3785	24.9588	24.9908	24.7136	25.1135	24.9489	25.4535	25.2006	25.2694
Trifunctional enzyme subunit beta, mitochondrial;3-ketoacyl-CoA thiolase	HADHB	24.2823	23.7882	24.1104	23.6928	23.4645	23.2586	23.6021	23.3902	22.4511	23.7656	23.1501	22.9472	23.0043	23.1071	23.8518	23.7092	23.1119	23.0775	22.3091	23.2125	23.3464	23.2208	21.8675	22.6406	22.6572	22.3767	21.8457	21.3666	22.7685	21.574	24.0399	23.9085	23.9501	22.7245	21.4384	22.9107	22.712	23.9839	23.0668	23.5915	23.1954	23.9749	23.6928	23.2338	23.1053	22.9228	23.1766	23.6378
Nucleosome assembly protein 1-like 1	NAP1L1	23.3108	24.4036	25.5151	24.9196	23.9901	24.2238	24.7648	24.3473	22.1063	25.5144	22.8806	25.4552	24.5596	24.1534	24.8672	24.6317	24.4028	24.9879	22.6842	24.4973	25.0439	24.4883	24.1723	24.0151	23.0055	22.4253	24.0877	22.6961	24.9705	23.1978	23.32	24.9301	24.2169	23.3649	23.0209	24.3954	24.3459	24.9204	24.9269	23.4779	24.6791	23.9734	24.0494	23.131	24.7103	24.2184	23.9109	23.7463
Protein SEC13 homolog	SEC13	21.7936	21.9784	22.0749	21.7051	21.9717	22.5232	22.5617	21.9054	21.253	22.6142	21.3471	21.8598	22.0105	22.6106	22.3075	22.8905	21.6633	22.5147	22.2814	22.4439	22.1634	22.2065	21.4235	22.1629	22.0153	21.929	22.6605	22.2376	23.3776	22.085	22.2055	22.7976	22.4448	22.4066	21.5482	22.1602	22.8154	22.7119	22.7098	22.2919	22.4398	21.9814	22.5689	22.5076	22.4027	22.5241	23.1242	23.5736
Puromycin-sensitive aminopeptidase	NPEPPS	23.2802	23.4927	23.4847	23.3408	23.1413	21.6613	22.5758	21.9737	24.8849	23.3305	21.5868	21.3883	21.4722	22.999	23.2339	22.44	23.0222	22.5298	21.3771	22.6935	23.0671	22.4465	21.6029	20.8883	21.5512	22.7684	20.3449	20.2918	22.7143	20.0383	22.8462	22.8035	22.8174	22.0741	22.6285	21.2389	22.4266	23.0368	23.0648	22.8421	23.3489	23.4309	23.5674	23.1967	22.6759	22.8409	23.0795	23.2598
Eukaryotic translation initiation factor 6	EIF6	21.8643	22.9049	21.624	22.1151	22.3869	23.5603	23.0105	23.2324	23.8229	22.3735	22.041	22.8031	22.8864	23.5786	23.2956	23.0825	22.5788	22.4094	21.2126	23.9802	23.6301	23.1114	22.8616	23.1064	21.8963	22.6734	23.6167	21.8879	24.344	22.5978	23.3264	24.0702	23.432	23.111	22.6709	23.1373	23.5544	24.0806	23.5474	23.04	23.1026	22.7358	22.2361	22.8577	22.5893	22.5276	22.8499	22.5382
Myotrophin	MTPN	23.4468	23.0337	22.7714	23.1007	24.2336	23.2104	23.666	23.8587	22.8377	20.4496	24.0871	23.4135	23.3832	23.3079	23.7732	23.6674	23.8672	23.4245	24.8539	24.1579	24.2716	23.6872	24.1431	23.6691	24.577	24.5423	24.2439	23.7074	24.1318	23.291	24.4333	23.7826	24.4222	23.8438	25.1172	23.9906	23.9066	24.0553	24.4735	23.4992	22.5378	22.9939	21.7219	21.8874	22.4949	21.3929	21.1732	21.3725
Actin-related protein 2/3 complex subunit 4	ARPC4	23.8137	23.4453	24.3567	23.8994	23.9426	23.284	24.1579	23.0672	25.1888	24.5144	23.0494	23.5513	22.9742	23.5118	24.1051	24.2938	23.7674	24.0686	23.0301	23.0889	23.8095	24.4695	23.1956	23.3681	22.9853	23.3342	24.0942	22.2925	23.8233	23.3014	23.9505	23.4867	24.3971	24.941	23.3641	23.738	23.6529	24.0885	24.5104	23.6639	23.1268	23.3979	23.9999	24.5472	23.8153	23.0602	22.9812	23.9927
Triosephosphate isomerase	TPI1	27.6798	27.1961	26.9177	27.038	27.0883	27.3447	26.7771	27.4595	25.4616	27.7677	27.2497	26.8162	26.625	27.3773	27.1379	26.9733	27.2517	27.2797	26.7854	27.1664	26.8749	27.0155	26.6878	25.93	26.9216	27.6674	27.4526	26.2852	28.2023	26.0973	27.6897	28.0387	27.8751	27.7157	27.386	27.0058	27.423	28.2631	27.8506	28.4461	28.4335	28.7845	28.1879	29.1123	27.7381	27.4177	28.1387	28.5322
Myosin light polypeptide 6	MYL6	25.6788	25.4428	25.5823	25.5533	25.5576	25.4634	25.8187	25.9039	26.0626	24.9039	25.9537	25.7873	25.6618	25.7046	26.1173	26.3833	26.0048	25.7931	26.0258	26.0131	26.2481	26.2001	25.8856	25.807	25.9417	25.7406	26.31	24.8558	27.0248	26.2196	26.0374	26.1527	27.1345	26.6366	25.7361	25.8869	25.6564	26.529	26.7072	25.3136	25.4155	25.3096	25.5575	25.1954	25.3479	25.6295	25.0305	25.999
Actin, cytoplasmic 1;Actin, cytoplasmic 1, N-terminally processed;Actin, cytoplasmic 2;Actin, cytoplasmic 2, N-terminally processed	ACTB;ACTG1	30.7348	30.7492	30.516	31.1641	31.1672	31.2987	31.19	31.2268	30.6123	30.4256	30.9516	31.375	31.084	31.4797	31.6457	31.9806	31.3788	31.1371	31.1366	31.4369	31.3748	31.6713	31.3085	31.0014	31.2993	31.0646	31.3494	30.2511	32.6216	31.2151	31.8416	31.8432	32.9696	32.7024	30.7811	31.4336	31.2907	32.7505	32.8226	31.1648	30.847	31.0102	31.3893	31.481	30.6563	31.1494	30.8354	31.5665
Eukaryotic initiation factor 4A-I	EIF4A1	25.0605	25.6016	25.5481	24.5844	25.3745	25.1616	25.3176	24.3279	26.4638	25.2896	23.8851	24.9546	24.9711	25.6837	25.6599	25.6405	24.6755	25.4956	24.8264	25.3023	25.3036	25.4662	24.4664	24.7866	24.3011	24.7721	25.3854	24.9908	25.1528	25.1245	24.7529	24.8251	25.0338	25.0432	24.6214	25.3881	25.9399	25.3425	25.5891	24.2696	24.3408	24.0386	24.28	24.0335	25.3029	25.2757	24.5525	25.1114
40S ribosomal protein S20	RPS20	23.4294	23.4531	23.6595	22.6821	22.9845	23.1119	24.0991	23.3862	24.1749	22.0316	22.5142	23.5855	22.8449	23.4983	24.1066	23.9289	23.3914	23.4142	22.6716	24.2304	24.1175	23.9617	23.444	22.9306	22.7147	22.2501	22.9128	22.2336	24.0648	22.6979	23.7099	24.0901	24.4958	23.2351	22.6804	22.9247	23.7143	24.7568	24.6778	21.6468	22.2913	21.8538	22.5138	21.3927	22.0068	22.7835	22.6263	21.9213
Proteasome subunit alpha type-6	PSMA6	25.2413	24.5397	24.8181	25.123	24.2036	25.1527	25.3696	25.4399	24.5093	25.2891	24.8209	25.2831	24.8961	25.2638	25.1901	24.7641	25.1877	24.2106	24.0822	24.2955	24.7978	24.2121	23.9313	23.0717	24.5205	24.4325	23.8706	24.5734	24.6989	25.1018	25.1309	25.0769	24.8788	24.8458	24.4998	24.0608	24.6563	24.4583	25.2951	25.414	25.4522	25.6156	25.2822	25.5945	24.9789	24.6926	24.7349	24.8841
Ras-related protein Rab-2A	RAB2A	23.8024	23.366	23.844	23.4377	23.3739	23.0973	23.6109	22.9908	24.1953	22.6818	23.2898	23.1973	23.1781	22.9851	23.7438	24.0177	23.0056	23.0725	22.9416	22.6574	23.0508	23.6155	22.7897	22.5738	23.0366	22.9031	22.9192	22.3365	22.2889	22.5352	22.8964	22.6591	23.6385	22.3945	23.3411	23.3531	23.2781	22.8958	22.592	22.1836	21.5937	21.8587	21.4357	21.7185	22.2798	21.5653	21.6024	22.476
Actin-related protein 3	ACTR3	23.512	23.5984	22.5356	21.8532	23.0163	23.7744	24.01	23.8057	23.8371	24.2325	22.3418	23.8979	23.2716	24.1044	24.0563	24.8087	23.8754	23.5996	22.1824	23.9453	24.1951	24.5264	22.9377	22.6013	22.8892	22.7091	23.8473	21.4271	25.5554	23.2493	24.5232	25.1963	26.0795	25.8075	23.7252	24.1084	23.8844	26.2069	25.68	24.6275	24.5188	24.5347	24.6772	24.1842	22.8533	23.5448	24.1602	25.2747
Actin-related protein 2	ACTR2	22.7284	22.2383	23.0675	23.2945	23.595	23.1	23.8273	23.7235	23.9701	24.2441	22.9844	24.2222	23.1977	23.9843	24.4293	24.7557	23.7165	24.0022	23.2046	23.7966	24.0978	24.578	23.4355	22.9264	23.7691	23.7725	23.9786	22.8142	25.0856	23.5504	24.8288	24.8769	25.7813	25.6999	23.7367	24.0774	23.935	25.7025	25.5219	24.0138	24.1336	24.1686	25.0014	24.5447	23.6062	24.1526	23.7637	24.9049
ADP-ribosylation factor 3;ADP-ribosylation factor 1	ARF3;ARF1	24.8741	24.2615	24.4242	24.3155	24.576	24.1868	24.393	23.8612	25.4802	24.7199	24.0755	24.1999	23.8734	24.2442	24.8243	24.401	24.1783	24.6323	24.5231	24.0025	24.1261	24.3815	23.9986	23.9949	24.3913	24.4076	24.5718	24.2479	24.0005	24.6041	24.6283	24.2359	24.7831	24.2851	24.3587	24.5975	24.4883	24.6313	24.745	24.5837	23.7365	24.4147	24.1733	24.5253	24.36	22.8662	23.6814	24.1721
10 kDa heat shock protein, mitochondrial	HSPE1	24.7955	25.3146	25.5458	25.046	25.1718	24.8184	24.9274	24.7074	23.6551	24.9598	23.9168	24.8967	24.1647	25.7934	25.218	23.8652	24.9273	24.6095	24.1402	24.5101	24.5905	23.8927	23.5047	24.2884	25.0303	25.316	24.9871	24.5442	24.7293	25.4181	25.2874	24.7298	24.0298	24.0659	24.5898	24.0893	19.8527	24.5899	24.7496	26.4788	25.5828	26.4672	25.7382	25.8501	25.5581	26.9861	26.7472	26.3659
Lysozyme C	LYZ	24.2117	26.797	26.7932	26.2801	24.6225	25.0128	26.7973	25.6474	24.2582	30.9385	25.3609	27.056	26.0121	25.2582	26.9183	30.3381	24.7914	28.1914	26.2146	25.1095	26.1352	28.7586	25.2988	26.6007	25.9591	24.7105	24.735	25.2045	25.0459	25.7737	23.19	23.7527	25.9032	24.1365	25.6743	26.832	23.7058	26.1598	23.803	24.6933	24.9246	23.9274	30.0705	25.7027	24.968	25.9466	25.0102	29.9588
Nuclear transport factor 2	NUTF2	23.8974	23.7002	23.6531	23.7584	23.4328	23.7752	23.2537	24.0137	22.3186	24.1144	23.3166	23.171	22.5485	23.9143	23.8296	23.4084	23.9895	22.9526	23.6466	23.8877	23.177	22.6666	22.4653	22.8816	23.2013	23.9737	23.555	22.79	23.3328	22.1656	24.5328	23.8145	23.9878	23.4621	23.7424	22.8745	23.8821	23.8052	23.8974	24.3843	23.9627	24.4366	23.6629	24.3455	23.5801	23.9463	24.2383	23.5439
Serine/threonine-protein phosphatase PP1-alpha catalytic subunit	PPP1CA	22.416	23.3336	22.3199	22.7136	22.312	23.4014	23.2065	23.5805	21.9498	23.194	22.4061	23.0265	22.0529	23.293	22.6875	22.9857	22.8954	22.6621	22.2153	23.4543	22.9231	22.5605	22.6246	20.6441	20.624	22.2209	22.5422	22.6744	23.4889	21.3948	23.7914	23.9632	23.9487	24.4479	21.8588	22.5173	23.3034	24.1224	24.3162	23.4835	23.9498	23.6968	23.1961	23.8673	23.4644	23.7781	22.9448	23.5609
40S ribosomal protein S8	RPS8	24.6569	24.6868	24.7152	24.3651	23.9246	24.2407	24.7215	23.8537	25.2746	24.3596	24.0735	24.5799	24.1279	24.8363	24.7824	24.8991	23.7397	24.5988	23.4669	24.8506	24.6607	24.7387	23.3874	23.5952	23.6607	22.458	23.765	23.4032	22.7642	23.9138	22.6874	23.6476	23.1429	23.6512	22.1457	23.8657	23.392	22.9115	23.3998	21.0796	22.7737	20.8039	22.7868	22.0452	21.1551	21.7864	21.0441	21.5704
14-3-3 protein epsilon	YWHAE	27.3756	27.3981	26.9707	26.9511	27.7396	28.2324	28.3116	28.3325	27.5864	26.0767	27.575	27.7849	27.8346	27.7815	28.2989	27.6516	27.7272	27.7322	27.2852	28.3405	28.3021	27.5265	27.7031	27.6284	28.1479	27.3453	27.7505	26.8064	27.7256	26.8236	28.2337	28.2825	28.1781	27.4153	27.6907	27.9356	28.1697	28.0111	27.893	26.24	26.0007	26.315	25.0437	25.6127	26.3481	25.9776	25.728	25.9598
40S ribosomal protein S14	RPS14	24.1374	24.4167	23.9868	23.6112	23.8388	24.0936	24.5054	24.1406	23.988	22.4977	22.7365	24.0038	23.5588	23.562	24.2323	24.1242	22.9564	23.9347	22.7981	24.2471	24.2159	23.9118	23.6353	21.749	23.7665	23.3754	23.9077	23.3515	24.1353	23.7979	23.3881	24.2708	24.0531	23.5458	22.9009	23.3253	24.0603	24.6885	24.4427	21.6659	21.8486	21.095	22.3438	22.0401	21.7558	21.8113	22.8067	22.0052
Small nuclear ribonucleoprotein Sm D2	SNRPD2	21.0798	21.4862	21.5235	21.7483	22.1147	21.8624	21.7846	21.2905	20.145	19.7816	20.6578	21.8162	21.0446	21.3623	21.6287	21.0638	21.326	20.2118	21.291	21.5221	21.8664	20.4804	21.0997	20.2237	20.8393	21.6423	21.313	20.989	21.4996	20.4806	22.0415	21.7155	21.8185	21.3952	21.0182	20.52	21.6822	21.6785	22.1824	20.684	21.5297	21.7984	20.379	20.985	20.4139	20.825	20.5361	21.184
Small nuclear ribonucleoprotein Sm D3	SNRPD3	24.6155	25.0637	25.0112	25.1028	24.4748	24.5055	24.5851	24.5583	22.6265	24.5766	23.8064	24.8731	24.2323	24.7094	24.818	24.3585	24.7068	24.8543	23.5093	24.3841	24.0081	23.3309	23.5432	23.5957	23.681	23.4922	23.4399	23.511	24.5262	22.977	24.7125	24.6109	24.5423	24.0148	23.5758	23.4766	24.2725	24.4967	24.862	25.4547	24.8067	25.1427	24.2681	24.7485	24.7598	24.8592	24.7031	24.4783
ADP-ribosylation factor 6	ARF6	22.4294	21.9235	21.6377	22.0358	21.9081	21.5316	20.6725	21.2631	22.0429	22.2376	21.6312	21.3559	21.2374	22.0356	21.4478	21.2658	21.5456	21.1943	21.4554	21.4279	20.8343	21.1969	21.1531	20.964	20.8837	21.8132	20.8351	21.1727	20.9736	21.0006	22.102	21.1621	21.8272	22.3842	21.3027	20.9416	21.7064	21.0952	21.5243	23.1825	22.1259	22.7673	21.8498	23.1527	22.3673	22.4797	22.2966	23.1635
40S ribosomal protein S4, X isoform	RPS4X	24.8351	24.8386	24.7172	24.5116	23.4448	23.5619	23.9026	23.3685	24.7341	25.1465	23.1836	24.0267	23.2985	24.279	24.2258	23.9218	23.6029	24.1493	22.6176	24.0297	24.08	23.7076	22.8059	22.9472	23.822	22.2037	23.2828	23.2626	22.8002	23.1288	22.567	22.9898	22.7021	22.8618	21.3647	23.1066	23.5789	23.0615	23.0652	24.1764	24.245	24.1371	24.0483	24.1507	23.7185	24.5661	24.1998	24.3138
Histone H4	HIST1H4A	29.2563	29.2962	28.9343	29.7329	29.0199	27.4513	29.5826	28.9541	28.5973	30.0616	29.8175	28.9986	29.1994	29.609	29.6208	28.8855	27.8821	31.03	29.4806	28.9648	29.3209	29.17	28.9455	29.035	28.2753	29.2714	28.5156	28.6767	27.2456	29.064	28.8536	27.6247	28.0065	28.8482	27.7111	28.2227	28.4922	27.0517	28.2314	27.8307	26.9676	27.4196	27.48	28.4127	27.169	27.165	26.8384	27.0903
GTP-binding nuclear protein Ran	RAN	24.8395	25.4725	25.0002	25.4467	25.5448	25.2712	25.2646	25.1119	24.8855	24.3261	24.7372	25.2159	24.9927	25.5599	25.4753	25.0995	25.5055	25.1956	24.4644	25.1599	25.0939	24.6358	24.7595	24.2872	24.7655	24.5664	25.119	24.5009	25.0535	24.6017	24.9831	25.2037	24.9155	25.3843	24.6792	25.0853	25.5565	25.3048	25.3768	24.6051	24.5757	24.6881	24.4023	24.5287	24.0825	24.4954	24.5267	24.5124
60S ribosomal protein L11	RPL11	25.552	25.8622	25.881	25.3356	25.328	25.4492	25.5226	24.5667	25.5095	25.5766	24.8769	25.4691	24.9799	25.7656	25.6232	25.1796	25.065	25.0264	24.1719	25.2314	25.0745	25.0446	24.5413	24.5615	24.6336	24.1354	24.9644	24.4284	24.7574	24.5988	24.9279	25.1244	24.9939	25.0698	24.131	24.8398	25.0568	25.358	25.577	25.2562	24.8028	24.4341	25.0292	24.9547	25.0743	24.8204	24.6283	25.1784
Peptidyl-prolyl cis-trans isomerase A;Peptidyl-prolyl cis-trans isomerase A, N-terminally processed	PPIA	28.1977	28.1414	28.5209	28.2071	28.5649	28.6238	28.2871	28.5462	27.7363	26.9474	27.8498	28.336	28.0237	29.0438	28.6029	28.4504	28.676	28.3828	28.2586	28.9242	28.2952	28.2483	28.259	27.967	28.2115	28.3814	28.8165	28.0582	29.4418	26.9198	28.6897	28.7477	28.7729	28.5563	28.5435	28.3052	28.6387	28.8563	26.6397	28.0407	27.9072	27.9552	27.6444	27.8738	27.582	27.6809	28.0661	27.9218
Transformer-2 protein homolog beta	TRA2B	23.948	24.4048	24.293	24.6926	25.0444	24.4819	24.2402	24.329	23.0502	22.6431	23.3851	23.9564	23.8663	24.5353	24.1758	23.9977	24.0669	24.0813	23.7033	24.388	23.8689	23.7659	24.0409	23.8438	24.5678	24.0999	24.0065	23.9652	23.8249	23.6732	23.3357	23.8647	24.154	23.7151	23.8316	23.3813	24.213	24.1274	24.5896	23.7375	23.5023	23.6214	23.2398	23.7058	23.6839	23.5665	23.6056	23.7114
14-3-3 protein zeta/delta	YWHAZ	25.5084	25.4699	25.2811	25.3729	25.9714	26.2755	25.8484	25.8987	27.0632	25.0085	26.3359	25.6911	26.0045	26.5255	26.0848	26.03	25.993	25.8014	26.0648	26.7306	26.1118	25.9728	26.0918	26.1965	26.6477	25.6393	25.412	24.8005	25.6264	25.5632	26.4261	26.0246	26.3903	27.308	26.1463	25.9627	26.3234	26.3512	26.9022	24.5788	24.7451	24.645	24.8049	26.1705	25.3099	25.582	25.3811	25.8154
60S ribosomal protein L38	RPL38	24.4342	24.6451	24.6276	24.8641	24.3545	24.007	24.2624	24.0777	23.4564	24.6776	23.2817	24.2666	23.7814	24.3925	24.2724	23.8788	23.7206	23.9416	23.0826	23.9966	23.662	23.2258	23.214	23.8892	23.1347	23.2713	23.6577	23.224	23.5798	23.3547	23.6916	23.5971	23.8843	23.323	22.05	23.3366	24.0015	23.7119	24.265	24.414	24.1469	24.29	23.9188	24.0225	24.5152	24.9905	24.1107	24.4727
Guanine nucleotide-binding protein subunit beta-2-like 1;Guanine nucleotide-binding protein subunit beta-2-like 1, N-terminally processed	GNB2L1	25.5271	26.1009	25.5783	25.4676	25.7483	26.3366	25.987	26.0408	26.2144	26.1322	23.6424	25.8913	25.291	26.3293	25.9927	26.011	25.6079	25.6094	24.7944	26.2238	25.7866	25.7388	24.6414	24.9282	24.4879	25.1917	25.4355	24.9677	25.7371	25.0731	25.2794	25.6691	25.6114	25.5987	25.1879	25.5278	26.1688	25.6598	26.0513	25.9802	26.0608	26.0982	26.018	25.6899	25.9129	26.1888	26.379	26.0744
Serine/threonine-protein phosphatase 2A catalytic subunit alpha isoform;Serine/threonine-protein phosphatase 2A catalytic subunit beta isoform	PPP2CA;PPP2CB	23.5336	23.4752	23.2085	23.2108	22.9076	22.9889	22.7967	23.2186	22.9688	23.8902	21.9253	23.331	22.8182	23.6595	23.0145	22.9195	22.6532	22.9911	22.1173	23.6233	22.8581	22.4047	22.3203	22.2948	21.9399	22.3116	22.275	22.0438	23.3966	21.9216	22.8713	23.2507	23.5675	23.1922	21.7782	22.1888	22.6648	23.5668	24.0033	24.186	23.9746	24.1609	24.4274	24.0051	23.8513	23.7986	23.9705	24.3132
Nuclease-sensitive element-binding protein 1	YBX1	22.1335	22.5712	23.4677	22.8328	23.1784	23.1976	22.7574	23.0678	22.3192	21.3711	22.3825	22.5513	22.7673	22.1169	23.298	21.9016	20.8037	22.2805	22.0803	22.9711	22.51	22.9177	22.1805	22.5639	22.4307	21.7223	22.9959	22.1438	22.064	22.243	21.8056	21.7508	21.0846	21.329	20.2393	22.806	23.0688	21.8098	21.4773	21.3042	21.0834	21.4984	21.6839	19.6958	20.7614	20.7234	21.7954	21.6845
Tropomyosin alpha-4 chain	TPM4	21.0959	21.7278	22.2011	22.5059	21.8917	22.4788	23.5868	23.2585	21.1888	20.6945	22.278	23.4515	23.3111	22.3981	23.3019	23.7304	23.8045	23.502	21.7666	23.5415	24.2501	24.0781	24.2001	24.3346	23.8464	23.3799	24.4258	22.0813	25.1322	23.0225	23.3203	23.7217	23.4047	24.326	21.7431	23.5739	23.4422	22.2501	23.4018	21.0344	21.5726	21.9174	21.5373	20.2355	21.8378	21.7184	21.9822	22.1784
Actin, alpha cardiac muscle 1;Actin, alpha skeletal muscle;Actin, aortic smooth muscle;Actin, gamma-enteric smooth muscle	ACTC1;ACTA1;ACTA2;ACTG2	28.0293	27.8628	26.9545	27.7026	27.5786	28.6091	28.8114	29.2363	27.6619	26.3777	27.4496	28.4986	27.8269	27.3968	29.0796	29.6554	28.7861	28.1542	27.1759	28.527	28.9419	29.4635	28.4943	28.1877	24.716	27.7578	29.036	27.0534	30.259	27.3485	29.6397	29.7731	30.8815	30.5915	28.0679	28.4483	27.4298	31.1693	30.9767	25.8894	25.5983	26.4779	26.8382	25.589	26.6082	25.8708	25.9274	27.4934
Elongation factor 1-alpha 1;Putative elongation factor 1-alpha-like 3	EEF1A1;EEF1A1P5	28.2444	28.4297	27.9666	27.9349	27.4782	28.1569	28.1113	27.8193	28.5064	28.7273	26.6479	28.5205	27.6286	27.8224	27.7622	28.0007	27.5572	27.8463	26.5094	27.9458	27.6557	27.2488	26.9436	26.8892	25.7086	26.8402	27.6139	27.0478	27.774	27.5705	26.7176	27.665	27.5559	27.8772	26.4274	27.6756	27.7875	27.804	27.9588	26.4969	26.8899	26.4537	27.8077	26.9725	27.5194	27.046	27.8012	27.45
Hemoglobin subunit alpha	HBA1	28.627	25.883	25.6077	25.4898	26.0214	24.8234	22.3269	25.2003	22.356	23.936	23.3237	21.8577	24.2095	24.2218	22.6066	22.83	22.8705	22.9229	24.0959	22.6119	23.4704	23.7103	23.5688	27.6639	23.4202	25.0965	24.8399	24.1951	22.5731	25.6123	24.8429	26.1741	24.3338	24.7144	24.2118	24.303	23.7135	23.5557	24.4819	25.962	24.2966	25.222	24.1981	25.6457	24.363	23.1724	24.3174	24.6738
General transcription factor II-I	GTF2I	23.9559	25.457	25.6078	25.6301	25.1998	25.4634	26.0116	25.402	20.6468	25.025	24.0199	24.9734	22.8431	25.6891	27.2956	25.2147	25.4155	25.5664	24.2704	26.0586	25.8278	24.6282	23.6674	23.7521	24.5063	21.8414	22.3483	22.2192	23.0048	21.4506	24.5244	25.361	23.619	23.9707	22.8871	23.0738	24.7694	24.5556	24.6133	26.5986	25.0053	24.7091	23.7965	25.0688	23.9178	24.5808	24.6502	23.9584
T-complex protein 1 subunit beta	CCT2	24.3165	24.6625	24.2657	24.0416	24.3035	24.1985	23.9587	23.153	23.5064	21.8888	22.8222	23.8047	23.2984	23.9199	24.8972	24.292	23.8965	24.6179	23.7113	24.4853	24.3681	24.1935	22.9668	23.4518	24.3054	23.07	23.7977	23.511	25.1173	21.6152	24.563	25.0973	25.2106	24.5836	22.2633	23.6676	24.5697	25.762	25.5144	22.9155	23.3125	23.5778	23.3299	23.5186	22.7807	23.533	23.4062	23.0469
Glutathione S-transferase omega-1	GSTO1	23.2845	23.21	23.1908	23.3472	22.9998	22.9901	23.23	22.7363	22.0359	22.073	23.3988	23.3685	22.8392	22.8413	23.1177	23.1052	23.0384	22.9345	23.0735	22.8641	22.9599	22.6256	23.0078	22.569	23.194	23.043	22.5491	22.8161	22.0739	22.4376	23.4031	23.184	23.066	22.7655	23.0738	22.8017	22.811	22.4547	22.4628	22.6779	21.8428	21.9587	21.8989	23.7461	22.4731	23.4908	22.384	23.6133
DNA-dependent protein kinase catalytic subunit	PRKDC	21.5701	24.0533	23.7408	23.2725	23.2316	23.6313	24.6853	23.538	23.2011	23.9997	20.6916	23.5937	21.4748	24.3881	25.2842	24.6381	22.5497	24.7764	21.2046	24.6297	24.942	24.6005	21.5572	23.1813	23.2527	20.6748	22.6167	20.5952	22.7177	20.9049	23.1778	24.4808	23.6447	23.1398	20.9958	22.3153	22.9281	22.9264	23.462	22.4513	21.137	21.7338	22.3708	21.8182	21.7743	21.0759	20.8712	21.0625
Dermcidin;Survival-promoting peptide;DCD-1	DCD	23.563	25.219	26.5418	26.3546	26.475	25.6889	26.5118	25.0907	26.3261	22.723	26.6423	25.2534	26.7109	24.9301	26.4962	24.2869	25.0942	25.5297	26.2957	24.4564	27.0638	26.784	27.2172	27.9288	26.3048	26.8953	27.1166	27.3595	25.0467	28.1904	25.7683	24.6954	24.4119	25.5188	28.1146	26.1132	25.4149	24.8902	23.3031	23.5553	25.6347	22.7387	24.538	25.341	27.4058	25.6689	23.9095	22.5606
60S ribosomal protein L24	RPL24	23.1521	22.1764	22.1858	22.1399	21.9919	21.2977	22.289	21.1033	22.2072	23.5428	21.8088	22.1668	22.237	22.5604	22.5216	21.82	21.0786	22.2739	21.4916	21.8928	21.8007	21.6872	20.9323	21.357	21.5778	20.6058	20.9271	21.9404	20.4944	21.5447	21.2242	21.4853	21.6564	21.3798	20.8305	21.3625	21.2921	21.3534	21.6619	21.5214	20.9656	21.0214	20.7856	21.3018	20.9754	21.5732	20.9742	21.968
Enhancer of rudimentary homolog	ERH	24.4794	25.1187	25.2845	25.3498	25.1636	24.583	24.4489	24.3584	23.6347	24.3988	24.3383	25.3035	25.089	25.4833	24.3602	24.3536	24.8153	24.3524	24.531	24.8235	24.5994	24.2117	24.1857	24.0448	24.2854	24.3841	24.3226	24.3602	24.7396	24.0324	24.7395	24.613	24.4811	24.4034	24.1855	24.088	24.7915	24.4695	24.6858	25.6044	25.6147	25.7724	25.1167	25.6322	25.4097	25.5099	25.1714	25.079
Cytochrome c	CYCS	23.603	22.4162	22.9005	22.4391	22.4685	22.566	21.9331	22.1143	22.6666	21.8468	21.541	22.8015	21.5179	22.3643	21.4048	22.4866	21.1254	22.349	22.1039	21.9694	21.0215	21.6453	20.9504	21.3663	21.1482	22.4164	21.7769	22.0712	22.3046	21.6185	22.5259	21.9403	22.5567	21.7849	21.8597	21.8523	21.3293	23.1607	22.8033	22.3472	22.3931	22.6219	22.5972	22.3451	22.5399	22.3951	22.4733	22.5446
Phosphate carrier protein, mitochondrial	SLC25A3	23.1605	22.5386	21.8528	22.1866	21.5495	22.6823	22.2842	22.6983	21.7347	24.0756	22.2595	22.6259	22.5282	22.3782	22.3022	22.407	22.3502	23.0124	21.0547	22.5348	22.3491	22.4767	22.353	22.4799	21.6683	22.2537	22.4172	21.2234	22.531	21.7724	21.5126	21.8414	21.6935	22.1445	21.3258	22.4883	21.998	22.2354	21.8012	21.6942	23.1	23.1461	23.5528	22.63	22.6755	23.1791	23.7384	23.502
Clathrin heavy chain 1	CLTC	26.0161	25.735	25.7001	25.4091	25.1317	25.8888	25.589	25.411	26.4098	25.6261	25.3361	25.6643	25.0816	25.5819	25.5015	25.8418	25.1587	25.5156	24.6227	25.6262	25.3573	25.7656	24.9406	24.9914	23.2024	24.9997	25.1546	24.1997	24.8934	25.1251	25.1524	25.2755	25.8739	26.0656	24.6992	25.4654	25.652	24.8418	25.4851	24.5578	24.3087	24.3546	24.9091	24.4091	24.7179	24.1947	24.389	24.7834
Heterogeneous nuclear ribonucleoprotein U	HNRNPU	24.1909	24.5838	24.7974	24.4916	24.1121	24.5282	25.2394	24.8499	23.2525	24.91	24.6471	25.1031	24.5746	24.9214	25.1997	25.0803	24.7367	25.0315	24.3136	25.0454	25.3317	25.1036	24.6501	24.6209	24.8797	23.6805	24.4218	23.4014	24.2011	24.0283	24.1562	24.8557	24.2539	24.3971	23.1828	24.3785	23.9182	24.4692	24.2014	23.865	23.4653	24.0639	23.2766	24.0505	23.6067	23.9318	23.9703	24.2798
Spectrin beta chain, non-erythrocytic 1	SPTBN1	25.494	21.5513	23.5111	24.4204	23.0867	18.6754	24.191	24.2543	20.8495	19.1136	24.6325	23.9603	21.8599	21.281	24.4913	22.979	24.2719	24.2329	24.1637	22.7545	24.165	23.2518	22.7801	21.7352	23.3627	22.1469	22.0833	18.9515	25.1058	21.908	24.9334	23.6745	23.021	23.7092	22.0775	21.4523	20.3874	22.2518	23.3088	23.9994	22.4922	23.5513	21.6251	20.899	19.7675	20.6656	20.4659	20.0456
Protein SET;Protein SETSIP	SET;SETSIP	24.6384	25.3047	25.1968	25.1233	25.3048	25.5849	25.6303	25.2534	23.7446	20.933	25.0736	25.2633	24.4872	25.7428	24.9421	25.0502	25.7677	25.136	25.5658	26.2536	25.5871	25.0255	25.5443	25.3625	26.0702	24.4058	25.5623	25.4005	25.4882	24.7773	25.9874	26.1572	25.3004	25.9264	25.3186	25.4039	25.503	26.0342	25.7177	21.8739	21.6101	22.1375	20.7825	22.1217	22.0989	22.0061	21.6334	20.9739
Serine/arginine-rich splicing factor 2	SRSF2	22.2566	22.8005	22.8127	23.1351	23.4184	24.0047	23.9549	23.6064	21.9543	21.7133	22.5235	23.5273	23.1555	23.1778	23.2466	23.5203	23.8609	22.5858	22.6163	23.7635	23.6233	23.1479	22.7895	22.9941	23.6544	22.777	23.8311	22.6447	23.3894	21.5043	23.4149	23.8419	23.2415	22.9668	22.8567	22.1132	23.3874	23.4353	23.622	23.2808	23.5353	22.606	23.3184	23.6058	23.2051	22.4883	23.0898	22.6375
Fatty acid-binding protein, epidermal	FABP5	23.2354	24.3378	25.2384	26.9058	23.8515	24.4167	24.5987	24.5858	29.6357	24.207	24.0536	25.0241	25.1651	24.6508	24.7791	24.4011	24.2059	25.1019	24.5763	24.1148	24.5558	24.6615	24.1712	24.6034	24.2916	24.4222	24.1957	25.3774	23.871	24.6008	23.317	24.1307	24.0841	23.2719	24.6771	24.2081	26.722	23.8674	23.818	23.2192	24.2515	23.1282	24.087	23.5565	24.6061	24.7198	24.5729	24.3385
Adenylyl cyclase-associated protein 1	CAP1	23.9915	23.5111	24.5367	24.5141	24.0079	22.5277	23.9941	23.4748	24.8063	23.4104	24.1056	23.4841	22.9248	23.6683	25.1298	25.1213	24.3114	24.469	23.8092	23.6065	24.4628	25.185	23.7853	23.0558	23.9169	23.2383	23.8858	22.4999	25.2841	22.6535	25.5472	25.5135	26.4223	25.9674	22.9591	23.6812	23.6039	25.7883	25.4727	24.7466	24.6637	24.4104	24.7292	24.339	24.2259	24.607	24.5319	25.4469
RNA-binding protein EWS	EWSR1	22.4475	22.579	22.587	22.5943	22.518	23.3694	23.1894	23.299	21.5685	21.2839	22.9588	22.6356	22.7983	23.2479	23.2331	22.5908	23.173	22.6155	22.0073	23.481	23.2503	23.0766	23.4312	23.1751	22.9993	22.6435	22.9769	22.3738	23.4417	22.695	23.3274	23.146	23.2096	23.1836	22.2509	23.0499	23.2066	23.4913	23.2414	22.3426	21.5199	21.9767	21.1427	21.7051	21.2523	22.094	22.1962	21.1748
Desmoglein-1	DSG1	23.8959	24.392	25.3079	25.3518	25.6978	25.1248	25.231	26.0825	27.584	24.1568	26.3534	25.3244	26.6149	23.9094	25.2273	24.4989	26.2574	25.438	27.1689	24.304	26.7106	26.2664	26.8689	27.6101	25.9695	27.3334	26.183	27.8548	25.1431	27.2845	25.4732	24.9413	23.9357	25.3484	27.5376	26.878	25.971	25.0017	23.9788	23.8749	25.7572	23.7052	24.7138	25.2622	26.4894	25.3063	25.649	24.0918
Peptidyl-prolyl cis-trans isomerase FKBP4;Peptidyl-prolyl cis-trans isomerase FKBP4, N-terminally processed	FKBP4	23.5539	24.5045	24.1448	23.3598	23.7074	24.1718	23.6804	23.7575	21.6021	22.9093	23.1068	23.8194	23.6393	24.036	24.0002	22.6525	23.6719	23.6258	23.1337	24.1715	23.6968	22.7458	23.1944	23.1596	23.4101	23.3289	23.6781	24.0705	22.7445	22.6789	23.3171	23.4794	22.2654	22.9943	23.2183	23.4511	24.5571	22.8208	23.108	24.8214	24.5362	24.5596	23.4426	24.0442	23.7053	24.1363	24.1361	23.3071
Lamin-B2	LMNB2	25.1226	23.8443	23.1728	23.9427	24.5237	23.5054	23.8509	24.0551	22.5038	22.1919	25.1621	22.606	22.8105	23.7241	23.6296	23.0674	24.2184	23.4597	25.4873	24.0021	23.5994	22.6739	23.904	22.2715	22.5511	25.4315	23.511	22.0832	24.0821	22.1353	25.383	24.2661	23.8978	24.3308	25.7685	23.208	24.0465	24.0238	24.366	23.5649	22.9042	23.6111	22.6228	23.4599	22.6577	22.1834	22.2477	22.1377
Proteasome activator complex subunit 1	PSME1	26.0676	25.6609	26.2218	26.3762	25.9316	24.9241	25.7034	25.4225	25.4532	25.5733	25.2486	25.3714	24.487	25.3209	26.0488	25.6064	26.1111	25.4813	25.7035	25.1892	25.6421	25.2247	25.695	24.9452	24.7966	25.3212	25.247	24.6683	25.3092	24.5973	26.3099	26.1212	25.8651	26.2139	25.8113	25.0971	26.0493	25.712	26.1572	26.2742	26.1039	25.9261	25.1117	25.8634	25.6412	25.2481	25.656	25.7619
Peroxiredoxin-1	PRDX1	29.6052	27.8222	27.8944	28.6928	28.8349	27.4346	28.0538	29.169	28.0927	26.1616	29.3396	27.9729	27.8944	27.8613	27.677	26.3529	28.7068	27.7439	29.4834	27.7721	27.6562	26.6115	28.579	27.7185	28.4947	28.3698	28.7099	27.7485	28.4935	27.8188	28.345	27.4734	26.7416	26.4455	28.8548	27.3525	27.8012	27.0835	27.9508	31.0761	29.7578	31.3153	27.3715	28.7832	27.3036	27.184	27.1145	27.1015
Complement component 1 Q subcomponent-binding protein, mitochondrial	C1QBP	23.213	24.2869	23.8371	23.9438	24.6783	25.2835	25.0153	24.6282	23.209	21.2624	23.807	24.7621	24.5535	24.9364	25.1019	24.4409	24.5169	24.5767	24.3905	25.2507	25.454	24.7285	24.5762	24.7152	24.6327	24.3702	25.0584	24.9761	25.3768	24.7934	25.574	25.4986	24.9798	24.5722	24.2904	24.9734	25.3856	25.415	25.2652	22.2885	22.3986	22.4742	21.7261	21.7209	22.7689	23.1206	22.8795	21.7158
Serine/arginine-rich splicing factor 1	SRSF1	24.4912	24.9838	24.64	24.7132	25.3002	25.2887	24.6967	24.8172	22.5272	23.8222	24.2937	24.8779	24.4909	25.3607	24.7546	24.8581	24.7299	24.5953	24.7767	25.3465	24.863	24.3589	24.9173	24.6948	24.6019	25.1867	25.2108	25.0554	25.0155	24.0504	25.3585	24.9791	24.745	24.6354	25.0698	24.8147	24.9838	24.5602	25.0058	24.9374	23.5151	24.0824	23.6932	25.2812	25.1704	24.7689	24.9852	24.848
Protein-glutamine gamma-glutamyltransferase E;Protein-glutamine gamma-glutamyltransferase E 50 kDa catalytic chain;Protein-glutamine gamma-glutamyltransferase E 27 kDa non-catalytic chain	TGM3	23.1277	23.0474	23.336	22.9616	23.9881	22.2886	23.4147	23.636	27.6202	22.5684	24.4077	23.5279	25.1253	22.3966	23.3168	21.5757	24.3458	23.7351	25.2668	20.9125	25.3334	24.315	24.8228	25.436	24.0349	26.1406	24.4347	26.5627	22.8426	25.351	23.0182	22.9256	21.6272	22.6993	25.9542	24.9412	24.7104	23.0578	21.535	22.6669	24.4051	22.2924	23.9475	23.8866	24.0743	23.2955	23.7672	21.7097
ATP-dependent RNA helicase A	DHX9	23.1298	24.1244	23.9024	23.935	23.4434	24.1419	24.2069	23.9623	22.1481	24.6038	22.6514	24.243	23.0279	24.8275	24.2871	24.4323	24.3144	24.5807	21.8823	24.7499	24.5064	23.9767	23.1614	23.6915	24.5026	23.5125	23.8194	22.9273	23.9638	23.3549	23.7124	23.9968	23.5907	24.1728	23.2797	23.728	24.4263	23.5782	24.5639	23.3381	23.4325	23.5179	24.5419	24.0301	23.9287	23.7176	24.1112	23.7593
Desmocollin-1	DSC1	22.2888	22.6382	24.0024	24.5334	23.4244	23.3032	23.3833	24.3481	26.8095	23.3292	24.5972	23.6942	24.6593	22.0042	23.5857	23.0622	25.011	23.4547	25.2744	22.1516	25.3817	24.9023	25.1255	26.0882	24.7259	26.0978	24.5474	26.4127	23.6449	25.6521	24.0294	22.9359	22.2576	23.2587	26.5067	25.2013	24.2433	23.3464	22.3704	22.6322	24.5207	22.6872	23.3771	23.7625	25.4707	23.7962	24.514	23.0317
Histone-binding protein RBBP4	RBBP4	24.0753	24.4376	24.1775	24.3253	24.3909	24.9516	24.682	24.8572	21.7185	23.9377	23.0477	24.7406	24.2356	25.3222	24.2275	24.3622	24.5234	24.5229	22.0989	25.2002	24.7204	24.03	24.1331	23.5555	23.8062	22.8179	23.9235	22.6981	24.6242	22.8774	24.3997	24.772	24.1523	24.7099	22.7289	23.4491	24.6086	24.4948	24.7724	24.9509	25.3142	25.1623	24.633	25.2561	25.0687	25.1883	25.1173	24.5163
Neuroblast differentiation-associated protein AHNAK	AHNAK	21.5409	19.726	22.9928	23.366	20.2849	19.8063	24.1485	22.0003	27.9046	20.4171	24.1923	24.5782	24.0498	18.0514	24.6349	26.0454	21.2435	22.6556	24.1051	22.1371	24.971	26.1963	21.4611	23.6693	22.8794	25.8039	27.3368	24.789	28.4569	26.8138	27.0236	26.721	28.2271	26.5963	23.2798	24.2804	21.7085	26.0734	25.442	21.6104	22.8824	21.2762	25.2183	21.1555	23.6932	25.0762	24.5753	26.405
Splicing factor 3A subunit 3	SF3A3	21.6887	22.9762	22.491	22.4171	22.8338	23.0178	22.7462	22.3523	20.6879	21.2954	22.063	22.493	22.34	23.2165	22.5724	22.2382	22.3157	22.6073	22.1492	23.1449	22.2686	22.0084	22.1941	21.7684	22.2837	22.2907	22.563	21.7992	23.2223	21.2424	22.7466	23.5227	22.5729	22.5505	22.2611	22.2693	22.6082	23.1186	22.5825	22.5627	22.512	22.6592	22.4406	21.9991	22.1096	22.525	22.048	21.8869
Interleukin enhancer-binding factor 2	ILF2	24.5229	24.8583	24.886	23.7098	24.4476	24.3636	24.5396	24.0755	23.4073	24.9625	20.4304	22.938	23.1975	25.2032	25.0926	24.4123	25.3404	24.3907	21.5865	25.0776	24.9375	24.2576	23.9946	21.2899	22.6459	23.7305	23.1923	21.9965	24.7969	18.5926	25.3563	25.2076	24.9045	24.9007	21.6973	23.0087	24.9178	25.0861	25.1513	25.8096	25.4592	25.9103	24.8846	26.0063	25.1961	25.4004	25.1116	25.0102
Interleukin enhancer-binding factor 3	ILF3	23.2942	23.9065	23.0919	23.7983	23.4484	22.7739	24.2212	23.4974	22.9662	23.613	23.7719	24.1159	23.2459	24.2842	24.6007	23.7728	24.3319	24.5437	22.9059	24.3046	24.3113	23.7487	22.9255	22.461	22.7252	22.3155	22.6365	22.1718	23.9784	21.7967	24.5992	24.7679	24.0547	23.4112	20.7946	22.7907	24.1214	23.9381	24.5124	24.0899	23.9869	23.9	24.2066	23.5432	23.665	24.0461	23.8292	23.462
Delta(3,5)-Delta(2,4)-dienoyl-CoA isomerase, mitochondrial	ECH1	24.6952	24.88	24.8956	24.7427	24.5025	25.1094	25.2145	24.9964	22.4895	24.8846	24.4066	24.7866	23.7774	24.7673	25.0269	24.5501	24.4126	24.2569	23.1151	24.7252	24.5069	24.6869	24.1134	22.701	23.9644	23.8892	24.2847	22.3945	25.4932	22.8702	25.8607	25.3575	25.3598	24.8584	22.2606	24.5021	24.4727	25.7233	25.4565	25.1751	25.1319	25.3311	24.548	25.3918	24.1399	24.3513	24.0764	24.0935
Heterogeneous nuclear ribonucleoprotein A0	HNRNPA0	22.7392	24.5842	23.8559	24.0101	23.0185	24.5975	24.4894	25.0129	22.0809	24.0391	22.7089	24.2174	23.6044	24.3337	24.6199	24.3178	24.6211	24.6014	21.8225	25.4795	24.9255	24.5213	24.6091	23.6276	23.2357	23.7118	24.1274	23.5585	25.2176	23.4334	24.3438	25.1375	24.1017	24.3445	23.4197	24.2067	24.535	24.9262	24.7278	24.4518	24.2612	24.5801	24.7909	24.7784	24.7546	24.3215	24.9247	24.3289
Peroxiredoxin-4	PRDX4	24.8439	23.9898	23.5777	23.4134	23.8908	23.579	23.5542	23.66	21.3747	23.6219	22.8332	23.2931	22.4667	23.2233	23.206	23.1286	22.7046	22.6713	22.6645	22.8438	23.0343	22.6949	22.1627	22.3199	22.3758	22.8652	23.5972	22.5474	24.7377	23.4883	23.1577	23.6184	23.2218	23.205	22.0311	22.5407	22.8604	23.0459	22.7012	21.7965	22.9907	22.53	22.9217	21.9913	23.4794	23.6873	23.4713	23.4502
Chromobox protein homolog 3	CBX3	24.5881	24.9266	24.6653	24.3986	25.3765	25.3283	25.3084	25.115	22.2559	22.9388	24.6167	24.6249	24.5481	25.7897	25.1902	24.7397	24.6781	24.6349	24.4753	25.6409	25.3864	24.6488	24.3314	24.8197	25.3893	24.9209	24.755	24.3299	25.1316	23.6387	25.1615	25.3665	24.7603	24.2887	24.8014	23.9371	24.8071	24.9007	25.2926	25.1814	24.5583	24.9548	24.2786	25.4933	24.7749	25.3981	24.7025	24.8991
Serine/arginine-rich splicing factor 9	SRSF9	22.5919	23.0125	23.4647	23.2676	23.6526	23.0279	23.6033	23.254	21.4133	22.8742	22.6386	23.1795	23.5182	23.334	23.4887	23.3571	23.386	23.071	23.0838	22.7413	23.482	22.9414	22.7067	22.6065	21.4519	22.5507	22.4891	22.4955	22.5488	21.5387	23.2479	23.4793	22.9604	22.3884	22.3089	22.7276	23.2258	22.9696	22.218	24.2508	24.2245	24.0766	23.489	23.4016	23.5511	23.4166	23.0176	22.9762
Transcription intermediary factor 1-beta	TRIM28	25.3415	26.2981	25.878	25.6465	26.1689	26.2822	25.964	26.0359	23.2807	24.496	25.1139	25.2013	24.8993	26.3439	26.1884	25.472	26.2307	25.7593	24.7048	26.4198	25.7621	25.3976	25.7961	25.0773	26.2402	25.5406	25.1359	23.4605	25.4286	23.7539	26.0863	26.3409	25.543	25.6669	25.2088	25.3442	26.2125	25.7329	26.0748	25.6201	25.6724	25.7261	25.2277	26.0891	25.2757	25.7001	25.7301	24.4803
Ras GTPase-activating protein-binding protein 1	G3BP1	22.6988	23.2806	22.6668	22.8291	22.2458	23.1116	22.781	22.4865	21.689	23.195	20.9352	22.9246	22.071	22.7869	22.3265	22.275	22.0263	21.6987	21.1362	22.8058	22.1789	21.704	20.9211	20.6844	21.0638	21.4498	21.855	20.8289	22.268	21.9865	22.1321	21.7387	22.2047	22.1358	20.8923	21.7828	22.5768	22.643	23.1909	23.3276	23.295	23.1207	22.8722	23.1514	23.4069	23.9648	23.4715	22.9171
Ubiquitin-conjugating enzyme E2 variant 1	UBE2V1	22.8781	22.7928	22.3396	22.7476	22.8248	23.4267	23.5328	23.7732	23.0455	22.3252	22.7814	23.1855	22.1429	23.3814	23.5597	23.3031	23.2282	22.9263	20.649	23.4855	23.4093	22.9907	22.8063	20.493	23.0376	22.6362	23.1766	21.4876	23.7194	22.3518	23.686	23.7391	23.7607	23.7956	22.9007	23.1072	23.52	24.177	24.0554	23.3573	23.4343	23.2834	22.9765	23.2779	21.988	21.612	21.0549	23.3561
NAD(P) transhydrogenase, mitochondrial	NNT	23.5379	21.8236	21.4599	21.6229	21.4116	22.2427	22.3158	21.9378	19.6531	22.3633	21.4393	21.9991	21.2447	22.2407	22.713	23.1245	22.8943	22.6896	20.9846	22.396	22.3017	22.8359	21.5303	20.777	21.0209	22.5073	22.7342	21.1567	22.9452	21.8037	23.0438	22.9965	23.0729	21.9137	21.1875	22.1276	22.0836	23.6574	22.4751	22.6224	22.2886	21.656	22.7239	21.355	22.575	20.8448	21.8337	22.1572
Peptidyl-prolyl cis-trans isomerase FKBP5;Peptidyl-prolyl cis-trans isomerase FKBP5, N-terminally processed	FKBP5	21.3455	22.0883	22.583	22.7095	22.1536	22.8825	22.274	23.089	25.2794	21.4698	25.8625	23.1748	22.0789	21.9395	21.5771	21.738	22.1978	22.2282	22.4051	23.0158	22.0394	21.7713	22.1275	21.8357	20.965	22.5072	24.0563	21.9197	24.3174	22.4119	23.3042	23.516	22.7747	21.6374	21.2291	22.5242	22.579	22.578	22.5052	23.6623	23.7929	23.4598	23.1569	23.6027	24.0335	24.1184	24.0666	23.492
Acid ceramidase;Acid ceramidase subunit alpha;Acid ceramidase subunit beta	ASAH1	23.3212	22.3344	22.5635	22.482	22.6488	21.2251	21.1723	21.3526	20.892	21.7819	22.9115	21.7952	22.1808	21.4858	21.6829	21.0987	22.8413	22.0301	23.0408	21.391	21.5056	21.1416	21.3451	22.1379	21.8789	23.6547	22.5862	23.5767	22.6127	22.4639	22.8102	21.4105	22.1382	22.7197	23.3158	21.5305	21.3701	20.4915	21.8306	24.6683	23.3147	25.2305	22.4219	24.1274	23.5134	23.1124	23.2008	23.1897
Transformer-2 protein homolog alpha	TRA2A	21.8639	22.2065	21.5603	21.3675	21.4377	21.979	21.5541	21.2917	19.9096	22.0257	20.6761	21.7037	21.0461	22.6431	21.649	21.4868	21.5732	20.9375	20.4391	21.8229	21.1595	21.0803	20.7456	20.7636	20.8653	20.7055	21.0841	20.3562	21.2136	20.4288	21.7142	21.2716	21.5383	21.6535	20.8745	20.5285	21.1623	21.332	21.9113	21.3863	22.5562	22.7437	22.3069	21.8861	22.6241	22.7426	22.6415	22.4986
Spectrin alpha chain, non-erythrocytic 1	SPTAN1	25.8399	22.4418	24.1868	24.3686	24.37	20.984	24.7615	25.2504	24.3314	21.6921	25.6036	23.7151	24.3101	23.1504	24.8586	23.5454	25.1544	24.5364	24.9697	23.3914	24.9749	23.9648	24.3152	23.307	23.6691	24.7056	23.4945	20.8613	25.5842	23.1707	25.4881	24.3255	23.7983	24.6665	24.9142	22.8266	23.4552	23.1715	24.297	25.1458	24.2559	24.9121	22.1964	21.2326	22.2773	22.3707	22.9255	22.1106
Spliceosome RNA helicase DDX39B	DDX39B	24.9126	25.2203	24.9524	25.0853	24.688	25.1589	24.8258	25.0349	23.8289	24.9234	23.9762	24.9816	23.8751	25.143	24.8358	24.6346	25.0897	24.8041	24.5026	25.1971	24.9376	24.5854	25.1464	24.8896	24.0527	24.9845	24.8923	24.1882	24.7282	24.1157	24.9933	24.9414	24.674	24.7316	24.6566	24.7055	25.1464	24.8007	25.033	24.9321	24.9161	25.1327	25.6578	25.7924	25.2503	24.4652	24.9467	24.9794
Bleomycin hydrolase	BLMH	24.4018	24.1668	24.5306	24.2937	24.6527	24.2395	24.3857	24.9318	25.0035	25.1118	24.8902	24.6391	25.4506	23.6689	24.3176	23.6217	25.7534	24.3418	25.1748	22.8936	25.8372	24.4301	24.9664	25.5976	24.532	26.7958	23.989	26.8271	23.7883	26.0612	24.3198	23.9931	23.3559	23.8513	26.5576	25.4648	25.2117	23.9258	23.8041	24.2784	24.7856	23.9894	24.2899	25.1198	25.0469	24.7105	23.896	23.7035
Tubulin beta-2A chain;Tubulin beta-2B chain	TUBB2A;TUBB2B	25.3611	26.4341	25.7914	26.3599	26.9144	26.9639	26.8534	22.7103	25.9287	23.1391	25.387	26.4543	26.3883	26.5578	26.8226	25.8222	26.8411	26.341	25.4498	27.0599	25.0985	26.2127	26.4413	24.6313	26.1978	25.2813	26.3626	25.9005	26.6124	25.9115	26.3017	26.6187	26.8509	26.5959	25.4055	26.3271	26.7098	25.5338	26.939	24.7147	24.8844	24.8286	24.7302	24.3037	24.9473	25.3807	24.1616	24.9683
Heterogeneous nuclear ribonucleoprotein D0	HNRNPD	26.0157	25.8693	26.0334	25.8322	26.3059	26.7026	26.042	26.7389	23.6775	26.4126	25.5969	26.6159	26.0591	26.7636	26.3183	26.1685	26.5757	26.7439	26.3723	26.807	26.2452	25.8029	26.4149	25.8582	26.4863	26.5273	26.2364	25.9226	26.3813	25.1559	26.813	26.6014	26.4552	26.36	25.8692	25.8906	26.3315	26.3173	26.765	27.5618	27.1671	27.5022	26.8879	27.4052	26.6314	26.8439	27.0357	26.7818
Septin-6	SEPT6	23.9328	24.0761	24.0808	24.0506	24.1211	24.1354	24.3573	24.6721	20.8064	23.8737	24.2819	24.1796	24.3045	24.4507	24.4117	24.0064	24.8466	24.2069	23.7194	24.411	24.124	24.1032	24.7284	23.5808	24.0383	23.6385	22.7939	21.1503	23.2026	21.911	24.2842	24.0278	23.9128	24.9723	24.2038	23.6532	24.3842	24.098	24.8241	25.1958	24.4449	24.94	24.0323	25.0652	24.1303	24.0069	23.919	23.8288
Caprin-1	CAPRIN1	22.314	23.4264	23.4188	22.7208	23.1711	23.4628	23.2881	22.8637	20.5945	21.6865	22.0589	22.894	22.7583	23.6367	23.3692	22.8752	22.7823	22.4943	21.6973	23.1039	22.9714	22.7061	22.3212	20.1062	22.8776	22.3501	22.6791	22.5811	23.6229	22.2531	22.6396	23.3022	22.8495	22.6791	21.6008	22.5206	24.0082	23.3078	23.538	20.0815	21.3844	20.5983	20.7308	21.483	22.0675	22.5519	22.2539	21.2561
DNA replication licensing factor MCM6	MCM6	19.2844	24.6612	24.3428	24.1168	23.6499	25.177	25.0378	24.7241	20.1519	23.1038	21.7049	24.8991	24.4626	25.095	24.9408	24.7186	24.9357	24.6209	21.4425	25.4529	25.042	24.7966	24.6348	24.5672	24.8563	21.6778	23.9029	22.6844	24.5844	22.9555	22.2104	25.026	23.9803	23.9705	21.841	24.2748	25.1295	23.7538	24.1077	20.841	23.5153	21.7504	23.2118	21.5504	23.2291	22.59	23.8867	21.047
Neutral alpha-glucosidase AB	GANAB	23.8657	24.5632	24.4438	23.2453	23.4069	24.5997	24.91	24.5375	23.0792	24.5608	23.2072	25.4186	23.8459	24.0671	25.0263	25.1958	24.5894	24.9513	20.235	24.1689	24.6257	24.8791	23.961	24.7069	23.1948	24.7415	25.6045	22.1328	25.867	24.8	24.9886	25.3341	25.3677	24.9227	24.4419	24.8697	24.7709	25.3627	24.7648	22.7655	22.945	21.7182	24.264	22.8364	23.5136	23.4712	23.4648	23.831
LIM and SH3 domain protein 1	LASP1	23.1313	22.6482	22.2961	21.9311	22.7821	23.1222	23.2908	23.2725	20.6638	21.4872	23.0911	22.9281	22.5972	22.8851	23.2229	23.3693	23.1022	22.9938	23.2748	23.0973	23.1313	23.1105	23.2086	22.8428	22.4823	23.0741	23.505	22.2769	23.9574	23.0035	24.2835	24.0047	24.6241	25.3197	23.1601	22.5743	22.8246	23.3388	24.1439	22.9153	22.8222	23.2496	23.4289	23.8682	22.0867	22.4867	22.1479	22.9046
Importin subunit beta-1	KPNB1	23.6989	23.9189	23.3435	23.4605	23.2364	22.1436	23.005	22.6771	22.658	24.3978	20.9688	23.1607	22.1251	23.0892	23.6099	23.3624	23.3264	23.349	19.5862	23.0595	23.4666	22.9487	21.5241	22.4504	21.5944	21.0937	22.3197	21.6256	23.6038	22.4874	23.9754	24.0765	24.0435	23.3452	21.9064	22.5718	23.001	24.3361	24.0991	24.9055	24.4814	24.882	24.2177	24.2828	24.7828	24.9178	24.3594	24.5853
Septin-2	SEPT2	24.2149	24.315	24.1943	23.6678	23.5555	24.2087	23.7321	24.0394	22.4593	23.8434	24.1844	23.6125	23.5672	24.6326	23.8811	23.7074	24.0735	23.5306	23.8087	24.228	23.671	23.5033	23.9289	22.4636	24.2111	23.533	23.3175	22.9901	23.0775	22.5685	24.0873	24.0615	24.1539	24.3576	23.8432	23.4835	24.2105	23.9241	24.185	24.653	24.1715	24.5954	24.0491	23.8082	23.2074	23.9322	23.7859	23.9801
116 kDa U5 small nuclear ribonucleoprotein component	EFTUD2	22.8305	23.1976	23.5683	22.5845	23.2575	23.7616	23.7245	23.3248	22.0939	22.6219	20.7084	21.891	20.5861	24.29	23.7281	23.4905	23.7887	23.1287	21.139	24.0649	23.5155	23.0824	22.5156	21.3247	22.3004	22.0845	22.947	22.0353	23.4184	21.6047	23.4656	23.7814	23.5267	23.3369	21.5743	21.5273	23.9471	23.7114	23.8774	23.328	23.4541	22.998	23.013	22.969	22.2614	22.1	23.0932	22.0614
Protein disulfide-isomerase A6	PDIA6	25.0206	24.9974	25.389	24.5443	24.6476	24.3506	25.4565	23.9289	24.2826	25.8481	23.0539	25.2509	23.6597	24.6216	25.7573	26.1091	24.5688	25.0768	22.6484	24.8898	25.4708	25.9272	24.11	23.5693	24.2044	24.3573	26.1639	22.6732	27.5933	25.5207	24.8289	26.0268	26.2533	25.4753	23.1386	25.7253	25.1623	26.7708	26.1871	24.4351	24.8249	24.5256	25.6282	23.7302	25.4183	25.191	24.9726	25.6193
Inorganic pyrophosphatase	PPA1	24.9448	24.9968	25.1179	24.538	23.8961	24.1641	24.5327	24.4477	24.3768	24.6116	23.5954	24.6522	23.202	24.9825	24.9937	24.7556	24.1759	24.5425	22.9642	24.5603	24.2489	24.1809	22.8955	22.2469	22.1821	23.3727	23.2125	21.3817	24.0706	23.3855	24.5522	24.7573	24.8225	23.7672	22.894	24.3423	24.1465	24.8151	24.7432	24.9899	25.2047	25.1266	25.071	24.0559	24.3967	25.0036	24.6491	25.0888
Non-POU domain-containing octamer-binding protein	NONO	24.0143	23.5576	24.2275	23.9913	24.034	24.9207	24.6653	24.9415	22.5987	24.848	23.5829	24.5533	24.387	24.7874	24.2731	24.1993	24.4598	23.7377	23.5508	24.7081	24.5186	23.7606	24.3362	23.6331	23.9291	24.2642	24.6072	24.2826	24.1629	23.4054	24.1127	23.9956	23.3263	23.9889	24.3372	24.0817	24.5557	23.7051	23.9713	25.1677	24.7192	25.405	24.4211	25.3088	24.8068	25.2219	24.8182	24.9098
Transmembrane emp24 domain-containing protein 2	TMED2	22.9399	22.1005	22.268	22.2137	22.4712	21.7777	22.5237	21.043	21.7731	22.1887	21.9042	22.6606	22.5373	22.2129	22.4767	22.3705	21.5258	22.6994	22.3464	21.6795	22.1981	22.1085	21.4773	21.9021	22.3438	22.1299	22.265	22.1487	22.0604	22.468	22.4325	22.063	22.8103	22.0581	22.1144	21.8928	21.7946	22.1454	22.2828	22.6558	21.9035	22.1744	22.3083	22.3678	22.4139	22.9508	21.9048	22.7285
Poly(rC)-binding protein 1	PCBP1	24.0669	24.741	24.4152	24.5368	24.7261	24.8614	25.1244	24.7074	25.3926	25.4633	24.2895	24.6306	24.6542	25.1268	24.9633	25.0988	25.1258	24.7135	23.1498	25.112	24.8316	24.9605	24.7424	24.7715	25.3116	24.547	25.1325	24.6136	25.2659	24.6359	25.2359	25.3049	24.9381	25.1745	24.643	24.9979	25.0977	25.5974	25.4361	26.1527	25.7627	26.0522	25.65	25.0819	25.6853	25.9268	25.5815	26.126
Transcription elongation factor B polypeptide 1	TCEB1	21.9067	21.2894	20.1216	21.7661	21.1443	22.5557	21.7871	22.3663	20.9235	20.5431	21.2839	21.9887	21.8435	22.6257	22.3881	22.4943	22.2545	21.8277	21.5769	22.6174	22.2292	22.1835	21.7512	21.493	21.444	21.3874	21.9041	21.1101	22.3958	21.3697	21.7554	22.6887	22.1858	22.1683	21.3071	21.9502	22.3682	22.579	22.2407	21.5359	21.5312	21.5943	21.8849	21.5348	21.5077	21.7425	21.5193	21.6699
Splicing factor 3B subunit 3	SF3B3	24.0824	24.9502	24.9095	24.7545	24.9115	25.2234	24.6776	24.5521	22.9303	23.8773	23.6919	24.5669	24.6075	25.2661	24.7858	24.4069	24.5778	24.7008	23.5198	25.0398	24.571	23.9669	24.1729	23.9025	23.134	24.3995	24.6447	23.7323	24.093	24.0208	24.4503	24.3017	24.1338	24.4066	24.2583	23.704	24.9465	24.002	24.8214	24.957	24.5251	24.8613	24.3146	24.5579	24.4293	24.4154	24.4039	24.4945
Splicing factor 3A subunit 1	SF3A1	22.8431	23.6056	23.5182	23.2625	23.1476	23.4187	23.1742	22.9717	21.6331	22.097	22.3728	22.5468	22.3549	23.3745	23.4676	22.9408	23.2128	23.0604	21.7361	23.3546	22.9699	22.9281	22.7986	21.9242	22.904	22.5026	22.8266	22.5644	23.6748	22.3493	23.4341	23.8851	22.7956	23.2706	21.9925	22.7562	23.4292	23.7343	23.3572	23.5976	23.4703	23.3626	23.1709	23.0499	23.0377	23.3252	23.5459	22.9921
Corneodesmosin	CDSN	21.6405	22.1829	23.7592	23.8642	22.9503	23.2959	22.7078	23.984	25.0922	22.2818	24.0698	22.8041	24.4201	21.9428	21.8339	22.2086	23.4481	22.5073	24.7522	21.8318	23.3136	23.151	24.0535	24.8804	23.0688	23.984	23.7506	25.111	21.6461	24.6629	22.3338	21.7826	20.5799	22.5347	25.0715	23.8392	22.8968	21.9855	20.9502	22.0049	23.4457	21.9959	22.8146	23.7686	23.6183	23.3172	23.852	21.6286
ELAV-like protein 1	ELAVL1	23.8877	24.5359	23.8228	24.0428	24.4234	24.8314	24.4259	24.4118	21.8841	23.7432	23.1823	24.3939	23.5756	24.9031	24.4447	24.0883	24.3236	24.3477	23.4042	24.6461	24.1427	23.6405	23.7503	23.853	22.7944	23.9902	23.9306	23.8845	24.0793	23.3424	24.5111	24.1771	24.0084	23.8432	24.0171	23.9307	24.5623	24.0033	24.561	24.5919	24.4588	24.9603	24.1315	24.5355	22.2851	24.7646	23.9768	24.0877
Ras-related protein Rab-11B;Ras-related protein Rab-11A	RAB11B;RAB11A	25.3543	25.1155	24.82	25.1808	24.8888	25.1152	24.7109	25.173	25.5685	24.1622	24.7884	24.4212	24.0887	25.0398	24.8342	24.5369	24.5902	24.5229	24.3632	24.943	24.4988	24.5489	24.7142	24.4161	24.965	24.6304	24.4063	23.4137	24.924	23.8798	25.0863	24.836	25.4486	24.7757	24.3836	24.3794	24.6633	24.7535	25.0464	25.5179	24.83	25.1293	24.498	24.2802	24.4816	25.2079	24.8969	24.7428
Septin-7	SEPT7	24.2193	24.0496	23.994	23.9645	23.5988	23.5442	23.9437	24.1315	23.217	24.1216	23.7356	23.7862	22.745	24.01	23.9079	23.4473	24.5188	23.3536	22.8269	24.0806	23.7738	23.4491	23.8328	22.0777	22.9523	23.1723	22.5928	22.0993	22.903	21.3665	23.9208	23.7756	23.8118	24.4025	23.2851	23.3417	24.2202	23.6962	24.2963	24.7113	24.415	25.1662	24.6818	25.0428	24.6302	24.521	24.8584	25.0001
DNA damage-binding protein 1	DDB1	24.3506	24.5261	24.0621	24.4107	24.2197	24.7548	24.0204	24.205	22.217	24.1639	22.8631	24.2056	23.832	24.723	24.0733	23.7273	23.9569	24.077	22.485	24.3271	23.9647	23.1374	22.7186	23.244	22.3026	22.6625	23.1294	23.3365	23.625	21.8278	23.6397	23.5572	23.2873	23.9438	22.9944	23.5095	24.0735	23.5169	24.2298	24.1813	24.6514	24.716	24.1844	24.1433	23.2247	23.6389	23.7461	23.5474
Hsp90 co-chaperone Cdc37;Hsp90 co-chaperone Cdc37, N-terminally processed	CDC37	21.8709	22.4553	22.3231	21.948	22.7843	23.0116	23.2601	23.0953	22.2091	20.2113	22.5734	22.8886	22.9717	22.4911	23.3524	23.5296	23.3442	22.7058	21.6977	22.7889	22.8864	22.5721	22.5059	22.5432	22.7177	21.8285	22.9285	22.1146	23.1816	23.1892	23.4886	23.6463	23.9337	23.0423	22.8808	23.4679	23.1796	23.6343	23.3329	22.3211	21.835	20.9339	21.7104	22.245	20.7758	21.2676	21.0499	21.1038
Dihydropyrimidinase-related protein 2	DPYSL2	25.0302	23.6514	23.9596	24.6039	24.2188	24.2421	24.641	25.0313	22.9271	24.3652	25.5015	24.6783	24.3108	24.2011	24.5443	25.1969	24.9085	23.432	25.0815	24.1516	24.5034	24.9075	24.7791	23.2429	23.7927	24.884	25.3327	23.6386	26.2333	24.1847	23.8885	23.8821	25.9556	24.4227	24.9766	24.5859	24.4172	24.5562	24.0851	24.1934	23.926	24.1153	25.019	23.8461	23.8418	24.3759	23.8266	25.107
Synaptophysin-like protein 1	SYPL1	23.263	21.8976	22.3139	22.2289	22.4819	21.8321	22.0527	23.0836	21.0822	23.0083	22.675	21.7085	21.8399	21.5177	21.5273	21.4849	22.5212	22.4065	22.8916	22.2286	22.4081	21.5669	22.6286	22.3938	22.2679	22.4829	22.317	21.0269	21.4708	21.5895	22.3459	22.1587	21.9064	21.0267	22.476	21.9489	21.761	21.5019	20.8792	24.35	23.6013	24.5646	23.0449	23.1305	23.1461	22.9201	23.2745	23.0511
Cleavage and polyadenylation specificity factor subunit 6	CPSF6	21.6621	22.8192	22.6635	22.5896	22.386	22.7042	22.3035	22.7773	20.8112	23.1188	21.9388	22.5685	21.9761	22.8522	22.636	22.0285	22.7526	22.3079	21.2976	22.6465	21.9558	21.9941	21.8874	21.4391	21.4964	21.9332	21.8232	20.9689	22.9423	20.8731	22.8519	22.8542	22.1905	21.0759	21.6459	21.0534	22.2253	22.5459	22.7451	24.1226	24.0325	24.213	23.6606	24.2452	23.8054	23.6367	23.9229	23.7826
MICOS complex subunit MIC60	IMMT	24.1993	24.559	24.2014	24.1441	23.9076	24.2163	24.2535	24.2133	23.7773	20.6658	24.3478	23.7664	24.1666	24.4786	24.0971	23.5844	23.8872	23.5012	23.4549	24.0951	23.7021	23.6536	23.4011	22.7538	23.5213	23.3074	23.7151	23.5644	24.3286	23.0174	24.5696	24.7355	24.5033	24.0661	22.0259	23.2639	23.9703	24.7348	23.8964	23.0672	23.0151	23.2365	23.0633	22.6458	22.9433	23.712	23.1815	23.4615
Heterogeneous nuclear ribonucleoprotein U-like protein 2	HNRNPUL2	21.9342	21.831	21.1515	21.8374	21.8347	22.0765	22.4703	22.4293	21.0848	22.6267	21.5748	22.5166	21.6693	22.2063	22.3957	22.5387	22.3711	22.5826	21.852	22.9119	21.8024	21.5041	21.7848	22.5877	21.7697	21.1648	21.4703	21.108	21.5975	21.3413	21.6257	22.3304	21.8338	22.4401	21.8	21.2436	21.9704	22.1406	21.9245	22.8567	22.0029	22.5973	22.2043	22.4608	22.3544	21.9173	21.7275	21.6502
Staphylococcal nuclease domain-containing protein 1	SND1	23.6339	23.1536	23.4584	22.9004	23.114	23.0406	24.3377	23.1314	24.0419	23.2207	22.4816	23.4833	22.5836	23.6728	24.369	24.5942	23.1006	23.5305	21.0187	23.4492	23.6409	24.8055	22.6087	23.3967	22.2749	21.4616	23.2287	21.6993	23.927	23.605	23.2885	23.3925	23.8933	23.1215	21.996	23.6604	23.9866	23.8253	24.0489	20.2294	21.2393	22.9675	22.2407	20.5606	20.7721	20.6005	21.1675	21.5562
Polyadenylate-binding protein 2	PABPN1	22.6152	23.2926	23.0178	23.168	23.3763	22.8914	23.002	23.3102	20.86	21.3744	22.2457	22.7401	22.5797	23.6859	22.8961	22.2486	22.8319	22.432	21.6934	23.1585	22.4215	22.7106	22.5634	21.7945	22.3018	22.405	22.1863	22.8164	22.4597	21.4308	23.2083	22.807	22.6586	22.5809	22.417	21.9604	22.9618	22.551	23.1152	23.5808	23.1516	23.3383	22.7492	23.1121	22.7928	22.6178	22.5214	22.0974
Fermitin family homolog 3	FERMT3	22.6843	23.7907	22.9658	23.412	24.4452	23.3926	23.6799	23.4243	21.9657	22.0963	24.0693	23.8012	24.1278	24.0727	23.9675	23.7782	23.0665	24.0374	24.0872	24.3774	23.9633	23.6977	23.2614	23.6863	24.3113	21.6535	22.7212	21.1382	21.822	21.5894	23.1554	22.8513	23.361	23.6378	22.9359	22.9629	23.8309	22.5456	22.7508	23.4373	22.5336	22.2212	22.7516	22.3091	22.3505	21.736	22.4095	22.6884
Nuclear pore membrane glycoprotein 210	NUP210	18.9842	21.4815	21.6374	21.405	20.9315	22.1821	22.7182	21.8105	20.1255	21.4907	20.0869	23.1765	21.9836	22.6513	22.7911	23.0895	20.921	22.4261	20.3767	22.9343	22.4883	22.5636	21.2732	21.7112	21.4657	21.6673	22.7285	20.9967	23.7483	22.3005	22.8472	23.7278	23.3694	22.6738	20.1899	22.333	22.3161	23.0916	22.8497	22.7356	22.861	22.7091	22.9646	22.2555	22.3406	22.9819	22.5054	23.3509
Programmed cell death 6-interacting protein	PDCD6IP	22.2114	22.9493	23.6794	21.7542	23.2705	22.586	23.6935	22.0621	24.1194	21.0611	22.0053	22.462	21.9094	23.0184	24.1301	24.0553	22.8746	21.936	19.8147	22.7807	23.7073	23.6546	22.4298	20.6966	22.5627	20.3903	21.1173	24.1691	23.6066	19.8694	23.7012	24.2995	24.5288	23.4308	20.4092	22.7521	23.2273	24.6718	24.0527	21.8279	21.8495	22.412	22.1703	20.334	21.4194	22.8028	22.2336	23.0717
ATP-dependent RNA helicase DDX1	DDX1	23.9464	23.1874	22.6412	23.5005	23.467	23.5302	23.5886	24.0446	22.3141	23.3774	22.6656	23.0728	21.9591	23.9939	23.7419	23.3073	23.8649	23.5552	21.4097	23.3342	22.7986	22.1707	21.894	21.5931	22.7165	22.8514	22.3764	20.3466	23.4149	20.7221	24.2801	23.9309	23.4384	23.3921	23.2411	21.9669	23.2049	23.689	24.1156	24.462	23.9395	24.3754	23.3279	24.463	23.0523	23.5584	23.5391	23.1339
Histone H1x	H1FX	23.3238	22.6423	23.3179	23.732	22.9871	21.2546	23.1125	23.4953	20.9544	23.397	24.3504	23.2042	23.6322	23.0347	23.8802	23.727	23.0507	23.7125	24.1411	22.7645	23.3926	23.2312	23.1254	23.5901	23.3588	23.0801	22.3826	22.5396	21.3255	22.1473	23.0212	21.6896	22.0847	22.5772	21.3606	22.5885	21.6235	20.4487	21.7286	21.089	21.1963	21.0357	21.0503	22.2562	20.5553	20.7603	20.6893	21.469
Heat shock protein 105 kDa	HSPH1	22.125	22.7531	22.4255	20.8713	22.3739	22.1997	22.1333	20.6948	23.1031	21.2425	20.692	21.5406	20.2326	22.9621	23.0613	22.3564	20.5299	20.8414	21.219	23.0697	22.2799	22.8282	20.1034	20.1379	20.9827	21.6452	22.5213	21.4592	24.5731	22.7068	22.1286	23.1386	23.1469	22.903	20.6087	22.629	23.9051	23.7701	24.4186	20.8665	20.6608	20.8076	22.0113	20.8195	22.4498	23.0636	22.0328	22.2299
Acidic leucine-rich nuclear phosphoprotein 32 family member B	ANP32B	22.6313	23.3908	23.0047	23.708	23.8068	22.401	22.2308	22.4217	20.8834	23.8536	21.7478	22.4733	21.9693	23.0354	23.0494	22.878	23.3283	22.5537	22.4915	23.0772	22.8984	22.5433	22.6233	21.1581	23.0146	22.6566	22.4528	22.2359	22.4153	22.4977	23.4777	23.0654	22.9608	22.3289	22.4079	22.3953	23.1005	22.771	23.2244	25.3352	24.7099	24.9458	24.7333	24.904	24.6657	24.5368	24.0796	24.6753
Histone deacetylase 2	HDAC2	22.5651	23.8531	23.364	22.6633	23.0698	23.6342	23.5582	23.1302	21.5718	22.8109	22.9489	22.8621	22.7423	23.8062	23.4162	23.1767	23.2653	22.661	22.313	23.5317	22.666	22.0673	22.7109	22.2027	22.8846	22.1241	22.3307	22.3526	22.5922	21.6215	22.9879	22.9378	22.5077	22.9426	22.5427	22.3107	23.5272	22.5707	23.2089	22.2043	22.2318	22.1809	22.1372	21.9135	22.8693	22.682	22.7218	22.1333
Gamma-glutamyl hydrolase	GGH	23.2082	23.1688	23.3682	23.0354	22.7687	22.835	22.7834	23.6049	22.9961	24.182	22.5854	22.9994	22.4394	22.6399	23.0732	22.9827	23.6147	23.0659	22.8	22.7344	23.0917	22.673	22.2445	22.7847	22.5356	23.4982	23.1832	23.7856	23.3944	22.9554	23.5184	23.0433	23.0745	21.9195	23.4883	22.6782	22.8295	22.9609	22.7035	22.5118	22.3432	22.7576	22.7509	21.9341	24.1753	23.4454	23.3368	22.7723
Probable ATP-dependent RNA helicase DDX17	DDX17	25.6095	26.3207	25.8617	25.8819	26.0596	26.0637	25.9994	25.8435	24.6158	25.66	24.7746	25.5373	25.1011	26.0526	26.0043	25.687	26.1788	25.6489	24.4122	25.8129	25.6573	25.4133	25.3787	24.2742	25.4926	25.2276	25.4289	23.1584	25.9209	24.7198	26.4226	26.1897	26.0204	25.8456	24.963	24.9577	25.8813	25.7637	26.2694	26.3058	25.9498	26.2127	25.5631	26.0056	25.6552	25.866	26.2008	25.5106
Far upstream element-binding protein 2	KHSRP	24.7211	25.53	25.2924	24.8081	25.3928	25.3067	25.4048	25.3868	23.3073	24.3617	24.8261	25.2552	25.0201	25.8176	25.5094	24.966	25.2338	24.9971	24.1129	25.3149	24.9218	24.9438	24.6815	24.4709	23.9909	24.6633	24.9003	23.8675	25.2377	23.5287	25.2418	25.5656	24.9953	24.6644	23.8371	24.5276	25.2709	25.4875	25.2312	25.4386	25.4081	25.4422	25.0732	25.377	25.022	25.0551	25.1928	24.9516
Sarcoplasmic/endoplasmic reticulum calcium ATPase 3	ATP2A3	20.9563	22.2491	20.9338	21.4958	23.4468	22.459	23.1197	22.7927	21.3544	21.5602	22.343	22.6175	22.8405	23.4988	23.5417	22.9092	22.9412	23.6583	22.9694	23.5126	23.5644	22.783	22.2975	23.2421	23.3373	22.0853	21.9217	21.3734	22.4723	22.4455	24.1868	23.6234	23.1523	23.2951	22.527	22.2841	23.0794	21.8773	23.0761	21.3082	21.9165	21.3029	21.9116	22.5886	20.9342	21.8028	23.0617	22.0949
Far upstream element-binding protein 1	FUBP1	23.8659	24.7064	24.2954	24.2424	24.7604	25.0468	24.7086	24.715	22.5325	22.9105	24.2821	24.6188	23.5214	25.1558	24.8002	24.5299	24.6916	24.5446	23.5435	25.2424	24.6384	24.4674	24.4944	24.1244	24.1318	24.5107	24.4891	22.4374	24.5518	23.8063	24.8861	24.6623	24.5083	24.7845	24.304	24.3491	24.9335	24.3149	24.8005	24.7093	24.4522	24.6286	23.6337	24.3563	23.9256	24.2272	24.2132	23.5832
EF-hand domain-containing protein D2	EFHD2	21.6253	21.4072	23.1232	22.8163	20.5534	22.7586	23.7069	23.194	21.5632	22.6978	22.7549	23.7685	22.6016	22.8224	23.776	24.2623	23.2872	22.9176	21.4385	23.2317	23.498	24.1516	22.8531	23.3071	22.987	22.2171	23.2303	21.8773	23.5425	22.7428	23.6453	23.9178	25.0946	25.8087	22.1342	23.3085	23.0945	24.2457	24.2163	23.7387	22.743	23.6263	23.1267	23.638	23.2518	23.2027	21.7324	23.5222
Ubiquitin thioesterase OTUB1	OTUB1	23.1355	23.1388	23.0542	22.4181	23.0291	23.2589	23.6804	22.8834	23.877	21.8955	23.3858	23.0731	22.9703	23.5088	23.5296	23.7049	23.4841	22.7913	22.9312	23.3744	23.4669	23.2606	22.5549	22.5184	22.9687	22.7608	23.0771	22.1868	23.5147	21.3449	24.1471	24.1343	24.2216	23.9206	22.8869	22.6224	23.6768	24.2284	24.0174	23.2503	23.034	23.1801	22.6472	23.3109	21.9815	23.0863	22.7373	23.0899
Phosphoglucomutase-2	PGM2	23.0236	21.6878	22.0222	22.2873	21.7004	21.9066	21.7835	22.2671	23.7631	22.2501	22.3658	21.9113	21.6979	22.0886	21.4251	21.9949	21.6246	21.832	22.1099	22.0345	22.1295	22.0488	21.7654	21.4119	21.4704	22.8491	22.1392	21.9263	21.514	21.2836	23.4124	22.2017	22.0345	22.5331	22.8692	21.1889	22.2651	21.1577	22.6142	22.3475	21.8138	22.144	22.0871	22.7202	22.4625	22.3749	22.4343	22.6165
Alpha/beta hydrolase domain-containing protein 14B	ABHD14B	23.2753	23.7087	23.1474	23.698	23.9013	23.5284	23.3629	24.0125	22.0846	23.0857	24.3102	23.5028	23.3687	23.8919	23.4447	22.9274	23.6148	23.5892	24.2629	23.8329	23.2796	22.701	23.1586	22.7086	22.8744	23.7371	22.7986	22.733	23.0502	21.6783	24.3841	23.9952	23.8697	23.3234	24.2102	23.1525	23.2882	24.0598	23.8506	24.844	24.2019	24.4819	23.572	24.5088	22.8767	22.7022	22.5677	22.5823
Up-regulated during skeletal muscle growth protein 5	USMG5	23.2864	23.6775	23.5406	22.8644	23.2634	23.4111	23.0817	23.2285	22.0583	21.5719	22.5656	23.2428	22.8798	23.3741	23.3913	22.8376	22.9912	23.1939	22.8778	23.2154	22.411	22.5342	22.5084	22.2375	23.2258	22.2968	23.193	23.2032	22.656	23.1385	22.9263	23.299	23.2454	22.6273	22.5615	23.0188	22.9268	23.114	23.1663	22.6575	22.5357	22.5734	22.2291	21.8029	22.2858	22.6784	22.4133	22.7089
Serpin B12	SERPINB12	22.2438	22.541	24.1859	23.0922	24.0652	23.3006	22.8671	24.3398	25.1318	22.4615	24.9272	23.1494	25.0339	21.5482	23.4331	21.9724	24.9076	23.7935	25.1357	20.2001	25.0836	24.3113	24.6978	25.5313	23.9101	25.773	24.4345	26.5917	22.7741	25.6932	23.6549	22.5002	22.2709	22.8256	26.1189	25.0011	24.2897	22.2716	20.671	21.6957	24.4187	22.3108	23.5146	24.6075	24.3517	23.6567	24.0536	19.9916
RNA-binding protein 14	RBM14	22.4111	23.2837	23.1947	22.4761	22.1627	23.1177	22.9209	23.054	21.5142	23.1575	22.0925	23.0602	22.8588	23.5216	23.0639	22.6779	22.9548	22.404	21.4604	22.8186	22.3639	21.7807	21.5317	22.176	21.3778	22.1303	22.2748	21.3921	22.6673	20.7309	22.3717	22.7522	22.4604	22.471	21.0417	22.0475	23.0619	22.1234	22.2378	24.3226	24.2025	24.3082	23.9434	24.0299	23.2912	24.014	24.3087	24.3829
Gasdermin-A	GSDMA	19.6551	20.7555	21.6779	21.5005	22.0525	21.1618	21.4104	22.3187	25.1253	20.9842	22.7709	21.7455	23.3597	19.8228	20.8023	19.8492	21.4396	20.9607	23.1512	19.7144	22.4949	21.7838	22.5306	23.1874	22.511	24.0901	22.5231	24.4875	19.738	23.7867	20.5216	19.6245	19.0063	20.6506	23.6029	22.7284	21.7902	20.2038	18.9159	20.8199	22.1157	20.0264	21.4496	22.5699	21.8065	21.2662	20.8948	19.8072
26S proteasome non-ATPase regulatory subunit 1	PSMD1	21.93	21.8794	21.5887	21.2427	21.6767	22.0219	22.0955	21.7363	22.9271	22.5117	19.537	21.5917	21.0955	22.554	22.4501	22.045	21.9103	21.4381	20.9849	22.1889	21.6574	21.6737	20.8218	22.6364	21.9761	20.1098	21.3964	20.6189	22.1894	21.9812	21.931	22.6868	22.6641	22.5422	19.7971	20.9896	22.1255	22.8528	23.2945	22.3768	21.4825	22.42	22.4979	22.4252	22.0724	22.9442	22.5828	22.6338
Protein deglycase DJ-1	PARK7	24.3273	24.432	24.3743	24.3891	24.3453	25.0534	25.0293	24.7042	24.01	20.8738	25.313	24.6407	24.7776	25.1828	25.3852	25.0905	25.1395	24.4626	24.7673	25.1604	24.7703	24.2942	24.7469	24.2416	25.1817	24.8186	24.8358	24.6473	25.2574	24.435	25.5147	25.8137	25.915	25.2436	24.8892	24.6635	25.0574	25.3663	25.3895	22.094	22.2355	22.2613	21.6368	22.4701	22.1775	22.8552	22.751	22.1578
Synaptic vesicle membrane protein VAT-1 homolog	VAT1	23.6265	22.9698	23.3765	22.6526	22.5071	22.2117	23.2906	21.3804	24.0499	24.2879	22.8218	22.6287	23.2532	22.157	23.3963	23.7538	21.9742	23.7053	21.6267	22.4369	22.9608	23.7111	21.6344	22.8757	22.2725	22.4286	23.5003	22.6892	24.1476	22.9193	23.0839	23.2115	22.966	21.6963	22.8178	22.8299	22.6161	22.4088	20.9961	23.2922	22.5311	23.6098	22.8844	23.5931	22.5982	23.4248	22.748	23.5813
Heterogeneous nuclear ribonucleoprotein A/B	HNRNPAB	24.2026	25.1202	24.0505	24.2405	24.0311	25.5154	24.4941	24.8784	22.401	25.0659	23.9431	24.8935	23.5666	25.5757	24.3079	24.1154	24.548	23.8721	23.5113	24.8638	24.216	23.6425	24.2524	24.0874	23.7198	22.2492	24.6037	23.6891	23.8952	23.4142	24.7946	24.5368	22.6884	23.7922	23.8593	24.0569	24.6415	24.1194	24.6866	26.1269	25.3304	24.8638	24.5143	25.1802	24.7454	24.8892	23.9913	24.6404
Nucleosome assembly protein 1-like 4	NAP1L4	22.7735	23.8374	23.7165	23.4384	24.111	23.757	23.997	23.668	23.0003	23.1468	22.9551	23.2863	23.3385	24.0339	23.719	22.7588	23.5714	23.272	22.6661	23.9041	23.405	22.9718	23.1928	23.3668	23.0991	23.1106	23.1917	23.2823	23.3244	22.0312	23.2667	23.2684	23.12	23.3466	23.3403	22.5988	23.9351	23.7108	23.8975	22.8672	23.4212	23.2503	22.9072	22.7468	23.3158	22.5067	22.9043	23.2345
Aconitate hydratase, mitochondrial	ACO2	24.623	24.0378	23.5893	23.7668	24.0798	24.0666	24.0648	24.0189	23.7373	21.9578	24.0555	23.044	22.6288	23.9034	23.8252	23.4546	23.8004	23.5308	23.2563	24.0406	24.0302	24.1784	23.8582	22.992	23.9729	24.1082	23.9255	22.95	25.2646	23.8551	24.3257	24.7355	24.9383	24.845	24.2894	24.2629	24.4104	25.9652	25.0485	23.6158	23.4909	23.8215	23.6611	22.8996	21.8934	22.9815	22.9427	23.2075
T-complex protein 1 subunit eta	CCT7	23.1791	22.7423	22.7927	22.5124	22.7731	21.8798	22.7931	21.448	23.6538	23.7271	21.2584	22.7245	21.8119	23.625	23.5945	22.8789	22.4581	23.3446	20.7369	23.2038	22.9786	23.0332	21.295	21.4733	21.975	21.6009	22.2694	22.204	22.9167	22.2114	22.7837	23.3513	23.044	22.8366	21.1621	22.2269	22.8729	23.5434	23.5933	21.6666	22.891	22.5504	22.821	21.381	23.0165	23.1816	22.58	22.8109
Protein arginine N-methyltransferase 1	PRMT1	21.7833	23.2064	23.0366	22.6844	23.3536	23.8344	23.0767	22.4378	22.2791	21.2793	21.8782	22.434	22.7511	22.9784	23.1903	22.4341	22.8104	22.4686	22.2689	23.5673	22.5693	22.3729	22.8848	22.4691	22.7956	22.1028	23.5246	23.3481	21.7404	23.2586	22.089	20.9895	21.3181	22.6043	22.6726	22.8259	23.9253	21.1709	22.7558	19.3881	20.8811	20.0209	19.9395	20.1848	20.8845	20.9168	21.8709	21.9439
Thioredoxin domain-containing protein 17	TXNDC17	21.9215	22.0605	22.4409	22.4186	21.5747	21.9665	21.8998	21.587	22.0611	22.8479	21.341	22.3661	21.9799	22.3626	22.1146	22.037	21.9104	20.682	21.7509	22.1803	22.421	21.5588	21.4688	21.893	21.459	21.7144	22.0834	21.8194	22.7317	21.9414	22.5771	22.4252	22.8161	22.2224	20.9321	21.5834	22.0734	22.5066	22.9763	23.4481	23.0477	23.6286	22.5422	22.8543	22.9219	23.3258	23.1245	23.6596
Extended synaptotagmin-1	ESYT1	20.5204	22.4811	21.6034	21.4932	21.9557	21.8008	22.3982	19.9989	20.8638	21.6179	21.6088	21.1138	21.7138	23.1584	22.398	22.6635	20.884	22.6326	21.6301	22.9754	22.1276	22.7236	20.5877	21.6041	21.8517	22.2208	23.1203	21.6489	24.6164	22.9508	23.4796	23.2646	23.4995	23.6325	21.2805	21.8263	22.5337	23.2086	24.0214	21.566	21.9058	21.836	22.6107	22.15	23.2077	23.2877	23.0914	23.0468
Transmembrane emp24 domain-containing protein 9	TMED9	22.9637	22.8774	23.2521	22.4484	22.9117	23.0761	23.2476	22.7251	23.3046	21.5002	23.0845	23.2517	23.0146	22.8308	22.736	23.5936	23.1034	23.2057	22.5124	23.3602	23.0047	23.6042	24.0194	23.9535	23.5862	23.2391	23.7367	23.2499	22.9113	23.8589	23.0573	23.0615	23.5784	23.4374	23.0702	23.5551	23.2957	23.4225	23.2457	21.1175	21.3123	20.6171	21.7826	20.3591	21.2885	21.38	21.6499	21.479
Apoptosis inhibitor 5	API5	21.9014	22.9017	22.579	22.6059	22.58	20.645	22.5095	20.8603	20.7157	22.2325	21.1659	21.2014	24.8167	21.86	23.5762	21.8251	21.7876	22.5553	22.0269	22.7226	22.8406	22.8238	22.1123	22.0373	21.4315	21.3078	22.0201	21.4451	23.4444	19.8565	23.4457	23.5826	22.8624	22.8242	21.2048	21.0948	21.9158	23.2436	22.7839	22.5911	22.6398	22.3843	21.824	21.5255	21.0424	22.4051	22.0993	21.9476
Ras-related protein Rab-1B;Putative Ras-related protein Rab-1C	RAB1B;RAB1C	24.8624	24.1936	24.5281	23.9336	24.3244	23.7219	24.4676	24.2825	24.8919	24.4178	24.6341	24.3142	24.1331	24.1933	24.2445	24.4443	23.8247	24.2371	24.0342	24.3417	24.1103	24.2824	23.7085	23.8959	23.7236	23.4932	23.7353	23.723	23.8692	23.7846	24.1742	24.217	24.773	24.4896	24.175	24.0711	24.2998	23.9322	24.5206	24.1761	23.7267	24.101	24.0918	24.1353	24.3433	24.2612	23.7523	24.4819
Inorganic pyrophosphatase 2, mitochondrial	PPA2	22.959	23.1171	23.0505	22.8915	23.2034	23.0041	22.8356	22.8215	21.3665	21.6413	23.4734	22.3529	22.8619	23.3318	23.2502	22.6766	22.8757	22.271	23.6419	23.1085	23.1131	21.7664	22.3365	22.3747	22.5916	23.4071	22.9333	21.9738	23.2342	21.8978	24.1044	24.0064	23.0001	22.7806	22.9152	22.5409	22.147	23.7203	22.1943	21.9212	22.294	21.3141	22.4226	22.0676	22.0425	21.967	22.0471	21.879
Glyoxalase domain-containing protein 4	GLOD4	24.246	23.6818	23.8221	24.0853	23.8191	23.5857	23.5123	23.5855	22.9378	23.5251	24.2551	23.3138	23.1773	24.4135	23.4613	22.6332	23.843	23.0699	23.9235	23.7341	22.9487	22.5063	23.2123	22.3875	23.4057	23.7256	23.1442	22.4188	23.0186	21.312	24.2512	23.5136	23.3756	22.8557	23.83	22.4694	23.4724	23.4087	23.5296	24.9397	24.5224	25.0653	24.017	24.7709	24.1507	24.52	24.6498	24.3099
Adipocyte plasma membrane-associated protein	APMAP	23.1473	22.5074	22.3526	22.3035	22.1379	22.1138	22.7695	22.0549	21.1825	22.7831	23.1172	22.5872	22.5541	21.9358	22.5834	22.5717	21.786	23.7418	23.4487	22.3735	22.6169	23.2567	22.0049	23.0332	22.8504	22.9175	22.7267	22.1897	23.0146	22.7926	22.9886	22.5993	22.9064	24.0694	23.1496	22.6276	22.1928	22.6758	22.7999	21.6101	20.5551	21.0419	20.9326	21.5916	21.2613	21.522	21.9727	21.7076
Regulation of nuclear pre-mRNA domain-containing protein 1B	RPRD1B	21.9645	21.5995	21.1901	21.3043	22.2082	21.759	21.4863	21.9407	20.574	19.8267	22.3429	21.1151	21.683	21.9004	21.7276	21.1984	21.6458	21.2585	22.4276	21.3815	21.521	21.8719	22.3168	20.2393	21.8688	21.9744	21.5258	21.9554	21.5942	20.4489	22.6287	21.7738	22.1151	21.7155	22.6496	22.1701	21.8229	20.6422	22.0795	22.463	22.135	21.7803	21.5195	21.554	20.8713	21.0811	21.2094	21.2809
Omega-amidase NIT2	NIT2	24.3083	23.53	23.9177	23.2988	23.3897	23.1658	23.3309	23.504	23.2014	24.7884	22.9293	24.0205	23.2369	23.6527	23.9064	23.8212	23.6808	23.0527	22.3803	23.6494	23.4714	23.5194	22.4774	22.7483	22.6446	22.2786	22.5311	22.3814	22.593	21.394	23.5182	23.6357	23.4102	22.4582	22.6432	22.761	23.1107	22.611	21.9703	25.0411	24.8282	25.2333	23.6962	24.3365	24.489	25.2016	24.8268	24.7573
Mycophenolic acid acyl-glucuronide esterase, mitochondrial	ABHD10	23.1371	22.5172	22.9383	22.5325	23.0347	22.5819	22.5946	22.6294	20.9732	18.8701	23.113	21.8629	21.5992	22.5052	22.7659	22.3718	23.0261	22.5936	23.0809	22.6625	22.2985	22.4383	22.8008	21.145	22.6649	22.8779	22.1205	22.755	21.7563	21.569	24.1974	23.7335	22.6406	22.2024	23.1469	22.1532	22.7892	22.8235	22.8835	21.9536	21.7686	21.7334	21.9583	21.616	21.5569	21.9484	22.2838	21.291
Methionine adenosyltransferase 2 subunit beta	MAT2B	22.1425	23.3566	23.1111	23.0219	23.1618	23.2339	23.0038	22.8744	20.7565	23.0227	22.4387	22.8914	22.3004	23.5523	23.1951	22.5369	22.4653	21.9745	20.7405	23.2547	22.8828	22.4523	22.3433	21.9375	21.9225	22.2586	22.6301	22.0738	23.396	21.4213	23.1869	23.0668	22.7493	22.6745	21.5661	21.2974	23.1076	22.9116	23.2281	23.5274	23.7572	23.806	23.6434	22.6964	23.3335	23.8328	23.6091	23.885
Calmodulin-like protein 5	CALML5	23.7091	25.1989	25.4949	27.2863	25.1368	24.1719	24.4044	24.682	30.5229	19.6705	26.1938	22.574	25.499	22.7192	24.6013	23.1774	23.5166	25.1945	25.1179	21.9463	24.5003	25.1818	24.8921	24.7398	25.0224	25.7936	24.8527	27.4062	21.7638	25.7117	23.1037	24.0111	21.8234	22.0703	25.1588	25.693	28.4526	20.4336	20.1535	22.9101	23.9233	23.6549	24.5133	24.2833	25.4847	24.5041	24.4888	22.864
Vesicle-associated membrane protein-associated protein A	VAPA	23.2305	23.413	22.7569	22.5911	22.6574	23.3623	22.7629	22.7638	21.8872	23.8328	21.918	22.8414	22.2907	23.425	22.5428	22.7691	22.4911	22.1657	21.5765	23.2695	22.41	22.2966	21.7043	22.1008	21.8337	22.2688	22.567	22.5035	22.9724	22.5487	22.7919	22.8578	23.0402	22.605	22.1133	22.3547	22.8607	22.7006	23.1089	24.2106	24.0569	23.8091	23.7393	24.6295	24.3205	24.3048	24.1562	24.1922
Protein RCC2	RCC2	22.5108	23.7597	22.9472	23.0018	23.3493	24.4217	23.5094	24.1941	21.0829	23.2788	22.616	22.9881	23.2074	24.3266	24.1236	23.5471	24.238	23.8935	23.185	24.5126	24.1059	24.1543	23.976	23.5049	23.6304	23.2847	23.8239	23.3366	24.2705	21.8029	23.3615	23.7175	23.0925	22.3925	23.027	21.1159	24.398	23.4619	23.5379	23.0515	22.7876	22.8458	22.2339	22.878	21.6362	21.1307	22.8956	22.5264
SUMO-activating enzyme subunit 2	UBA2	22.119	22.0399	22.0515	21.2525	21.9683	22.4004	22.2994	22.0689	20.4038	21.7116	21.903	21.825	21.1104	22.9054	22.4693	22.0443	22.599	22.054	21.1207	23.0862	22.3616	22.4002	22.4838	21.5043	22.3864	21.8513	22.1351	21.4368	22.9567	20.4896	22.4633	22.889	22.1151	22.4593	21.84	21.9168	22.3203	22.5172	22.9408	23.0593	22.7144	22.9343	21.9227	23.2678	22.6796	22.6173	22.4951	22.356
Prefoldin subunit 2	PFDN2	21.9933	22.7988	22.5762	22.3198	22.2684	22.7046	22.6157	22.2244	21.2935	22.4972	21.662	22.3414	21.8997	22.8842	22.5558	22.1154	21.8318	22.0979	21.3298	22.1187	21.5836	21.6491	21.2142	20.947	21.6577	21.3376	21.668	21.3773	22.3813	21.4035	22.2916	22.6066	22.474	22.0133	21.4311	21.7821	22.4185	22.7898	22.82	23.0732	23.2938	23.3183	22.6566	22.688	22.8065	23.3932	22.8383	22.9795
Poly(U)-binding-splicing factor PUF60	PUF60	22.3338	22.65	21.713	21.9829	22.2757	22.8633	22.6733	21.8995	20.5791	22.2493	21.7177	21.9492	21.9882	23.0906	23.0936	22.7744	22.6164	22.5738	21.7242	22.6741	22.2919	22.064	21.384	21.4898	22.5046	21.522	22.645	22.4549	22.3969	20.7263	22.5899	22.8418	22.3679	22.2917	21.2995	22.0207	22.7959	22.3954	22.6898	21.5369	21.6583	21.7879	22.8166	21.4899	21.0936	21.8698	22.4394	22.3805
Drebrin-like protein	DBNL	21.7156	21.9076	22.4467	22.0438	22.1565	22.1299	23.1215	22.4895	22.5534	22.3778	22.0574	23.1717	22.6309	22.8139	23.2307	23.8916	21.8281	22.3674	21.7614	22.8731	23.3645	23.3601	22.2644	22.1366	22.5485	21.5518	22.5495	19.9658	23.3054	22.1861	23.0364	23.6165	24.3093	24.0649	22.0274	22.9651	22.6572	24.062	23.6645	22.3236	22.6766	22.4769	22.5849	22.2329	21.3905	22.9351	22.3777	23.3422
ADP-sugar pyrophosphatase	NUDT5	22.2089	23.7233	23.7953	23.5749	23.8758	23.5232	24.2573	23.8072	23.0825	23.6597	23.4132	24.3557	23.9534	23.7192	24.266	23.5884	23.5633	23.3038	22.9695	23.9025	24.2398	23.99	22.7633	22.9152	23.0683	23.8651	23.6934	23.9867	24.2502	23.6428	24.5597	24.5992	24.3183	23.8723	23.891	23.0036	24.078	22.9793	23.8895	22.676	24.3263	24.4738	23.9307	24.0957	23.4238	23.8611	23.8327	24.0532
Proteasome activator complex subunit 2	PSME2	22.8671	22.8377	23.3481	22.4856	23.4393	22.4842	23.3675	22.966	23.1515	21.5819	22.7192	22.9834	22.1441	22.986	24.092	23.9537	23.7506	23.3527	22.4129	22.9309	22.9332	22.9753	22.5878	21.963	23.5082	22.4353	22.9554	21.8225	22.8278	22.8753	23.9836	24.2554	24.058	24.004	23.4	23.1738	23.7957	24.2441	24.0465	22.0985	22.7532	22.3479	22.0254	21.6628	20.4607	21.8295	21.6922	22.2066
Pre-mRNA-processing factor 19	PRPF19	23.0343	24.0741	23.7179	23.827	23.9751	23.8678	23.5118	23.0291	22.3068	21.7617	21.892	23.224	22.4584	23.8503	23.8696	22.7952	23.489	23.6641	22.8964	24.2873	23.0134	22.9685	23.1755	22.8422	22.6928	23.1866	23.8267	23.4643	22.6913	22.4199	23.0212	23.0138	22.3633	23.4177	23.1266	23.209	24.0332	22.7191	23.583	22.516	22.5543	22.4642	22.6867	22.5151	21.992	21.5598	22.6388	21.8095
Ubiquilin-1	UBQLN1	22.4919	22.2791	21.6872	21.6058	22.2784	22.7479	22.2601	22.372	21.663	23.0276	21.352	22.5931	21.8787	22.5694	21.8409	22.1703	22.2212	22.0787	21.69	22.7614	21.7647	21.5941	22.2094	22.44	21.3359	21.4528	22.25	21.6586	21.4682	21.5414	22.4398	22.3106	22.3767	22.0832	22.0356	22.2931	21.8642	22.866	23.1043	23.1454	22.9474	23.4259	22.145	22.397	23.1772	22.7877	22.4822	21.238
NSFL1 cofactor p47	NSFL1C	23.0941	22.4696	22.5515	22.5756	22.9587	23.1722	23.1211	23.0665	22.9345	20.9041	21.8265	21.8294	21.9036	23.7338	23.7084	22.1173	23.3292	23.0918	23.1661	23.8334	23.3797	22.7807	22.7466	22.0342	23.3606	21.9473	21.5952	20.9681	22.5762	20.9546	23.5812	23.5464	22.8002	21.4325	22.8596	21.9085	22.7612	22.5556	23.2487	22.6443	22.7711	22.7815	21.9124	22.2005	22.2944	21.8737	22.1397	22.1104
Proliferation-associated protein 2G4	PA2G4	22.8991	23.3681	23.5707	23.5211	23.2662	23.7509	23.7289	22.7502	23.1143	22.4767	22.6052	23.2146	22.8875	23.6435	23.8769	23.5737	23.5676	23.8847	21.6629	23.7936	23.7343	23.6192	22.3968	21.4516	22.9807	22.3051	22.8498	22.6156	23.5147	22.4953	23.3017	23.9989	23.6487	23.6261	21.8819	23.1253	24.0506	23.903	24.1977	22.9318	23.0932	22.885	23.1902	22.6492	22.1272	22.9648	23.2223	22.4631
RuvB-like 2	RUVBL2	23.2819	24.3799	24.2082	23.56	24.0141	24.3979	24.7089	24.0563	22.5505	23.285	22.9321	24.1414	23.1863	24.4897	24.5679	23.8876	23.9874	23.6671	21.8004	24.2363	23.9941	23.9249	22.3924	22.3697	23.6762	22.5877	23.4384	22.4164	24.3461	23.3852	24.6525	24.5526	24.2033	23.8249	23.6039	23.6022	24.4914	24.7459	24.6968	23.9162	23.9684	24.1163	23.2212	23.7883	23.4388	24.2506	23.7441	23.5292
Nuclear migration protein nudC	NUDC	21.8857	22.9159	22.5304	22.3769	22.6229	23.643	23.6434	22.5208	21.332	20.5098	21.9036	22.6727	22.6251	22.9992	23.4552	23.2058	22.5167	22.4085	21.4746	23.4004	23.0319	22.7371	23.0026	22.333	22.8296	21.8314	23.2682	23.4334	23.5566	20.3901	22.8846	24.0037	23.483	22.7568	22.0772	22.9767	23.9802	23.5935	23.4812	19.8314	20	19.5711	20.5804	18.6001	19.4657	20.3476	21.444	20.1701
Voltage-dependent anion-selective channel protein 3	VDAC3	23.5188	23.8281	23.7105	23.5926	22.6476	23.73	23.3543	23.4877	22.0176	24.7738	23.4587	23.7324	22.7037	23.4752	23.5171	23.7054	23.5432	23.7607	23.6765	23.3043	23.179	23.2101	23.5311	23.5109	23.1511	23.1592	22.2787	22.5195	22.5429	23.1173	23.5724	23.1269	23.142	23.4523	23.2219	23.1323	23.4798	22.8666	22.8627	24.3429	23.9568	24.4189	23.9087	24.1304	24.0789	23.8956	23.9657	24.137
Protein canopy homolog 2	CNPY2	22.9538	22.4643	22.8535	22.2695	22.4918	22.4706	22.865	21.9168	21.7942	20.514	22.3364	22.7756	22.3362	22.7062	22.7034	22.3733	21.5894	22.6843	22.3611	22.9007	22.6355	22.6992	21.9694	22.2155	22.0047	22.0787	22.4733	22.0148	22.5962	22.119	22.9606	23.0207	22.8086	21.9569	22.1925	22.2682	22.586	22.5689	22.4299	21.369	21.3703	21.4991	21.0422	21.4878	21.0584	21.4223	21.5579	21.1815
U6 snRNA-associated Sm-like protein LSm2	LSM2	22.6359	22.7039	22.7043	22.5478	22.7598	22.7506	22.5368	22.4494	21.0051	20.3342	23.2612	22.5026	22.9001	23.0856	22.6211	22.4754	22.6289	22.7507	23.0717	22.5	21.8103	22.1704	22.2414	22.041	23.5567	22.8611	22.5207	22.0616	22.4013	22.6902	23.0935	22.7824	22.4302	22.6718	23.1029	22.5495	22.9018	22.2239	22.6162	22.1221	21.1576	21.8376	20.3586	21.5727	20.936	21.1017	20.8708	19.303
Serine-threonine kinase receptor-associated protein	STRAP	22.916	23.9676	23.5071	23.0669	23.7407	23.944	23.9027	23.3852	23.4305	21.2554	21.316	23.7313	22.5048	24.1173	24.053	23.7565	23.2836	23.2066	20.8506	24.1377	23.8427	23.6555	22.6706	22.1154	22.882	22.5015	22.9935	21.668	24.0038	21.9208	23.7412	23.7919	23.7599	23.8272	22.1001	23.543	24.2038	24.3132	24.466	21.4843	21.4692	20.9023	22.5327	20.8847	22.0266	22.8845	22.9252	22.4013
tRNA-splicing ligase RtcB homolog	RTCB	24.0999	23.6373	22.7201	23.1672	23.836	23.9111	23.6916	23.9034	22.8724	21.4695	23.8363	23.3986	22.752	23.6602	23.7972	23.1076	23.882	22.802	23.2171	23.5071	23.0172	23.144	23.0733	21.8947	23.4975	24.1478	22.9644	21.3433	23.5839	21.739	24.2878	23.7181	23.5388	23.3552	23.369	22.8878	23.9303	23.6702	24.3461	23.4257	23.2302	23.7128	22.6584	23.7633	21.3459	22.8195	23.2701	22.4313
Talin-1	TLN1	25.2459	25.9899	25.5124	25.4869	25.7996	23.6571	24.9139	23.3146	21.4105	26.4254	24.0105	24.5214	24.5242	25.9273	26.3133	26.2208	25.279	25.794	23.0714	26.0533	25.9471	26.1435	23.8859	24.8342	26.1461	21.3733	23.1064	19.8805	26.4282	22.5109	25.3725	26.3412	26.668	26.1973	21.9065	23.9023	24.926	27.0192	26.5439	25.9897	25.984	26.0456	26.7491	26.6653	25.0816	26.0107	25.5899	26.688
[truncated: 15 more columns]
