# Supplementary material for: Proteomic Profiling Identifies Specific Leukemic Stem Cell-Associated Protein Expression Patterns in Pediatric AML Patients
Source: Cancers (Basel). 2022 Jul 22;14(15):3567. doi: 10.3390/cancers14153567 (PMC9332109; doi:10.3390/cancers14153567)
Supplement: Supplementary file 1 [file cancers-14-03567-s001.zip › Table S4_Petersen et al.xlsx]

## Sheet: Table S5
Table S4: List of 34 differentially abundant proteins between AML-SC and HSC samples
Gene names	Description	–Log10 (P-value)	P-value	Log2 FC
NUP210	Q8TEM1;Q8TEM1-2, "Nuclear pore membrane glycoprotein 210"	1.60416	0.0248796	2.14018
HNRNPA0	Q13151, "Heterogeneous nuclear ribonucleoprotein A0"	2.30693	0.00493254	1.7128
TAGLN2	P37802-2;P37802, "Transgelin-2"	1.4851	0.0327264	1.61911
NAPA	P54920, "Alpha-soluble NSF attachment protein"	1.61665	0.024174	1.55135
PCBP1	Q15365, "Poly(rC)-binding protein 1"	1.59154	0.0256127	1.4174
CELF2	O95319-5;O95319-2;O95319;O95319-4;O95319-3, "CUGBP Elav-like family member 2"	1.34145	0.0455563	1.38568
HLA-DRA	P01903, "HLA class II histocompatibility antigen, DR alpha chain"	1.30979	0.0490016	1.18947
HSPE1	P61604, "10 kDa heat shock protein, mitochondrial"	1.38242	0.0414557	1.16186
EIF6	P56537;P56537-2, "Eukaryotic translation initiation factor 6"	2.3394	0.00457718	1.15403
ACTR2	P61160;P61160-2, "Actin-related protein 2"	1.78205	0.0165178	1.01915
DHX9	Q08211, "ATP-dependent RNA helicase A"	1.74417	0.0180232	0.999839
RNH1	P13489, "Ribonuclease inhibitor"	1.58964	0.0257255	0.841268
NONO	Q15233;Q15233-2, "Non-POU domain-containing octamer-binding protein"	1.56726	0.027086	0.821697
SF3B3	Q15393, "Splicing factor 3B subunit 3"	1.97895	0.0104968	0.734193
SRSF2	Q01130-2;Q01130, "Serine/arginine-rich splicing factor 2"	1.89651	0.0126908	0.641376
SRSF1	Q07955-3;Q07955;Q07955-2, "Serine/arginine-rich splicing factor 1"	2.39504	0.00402684	0.624
CBX3	Q13185, "Chromobox protein homolog 3"	1.84201	0.0143875	0.408013
NAP1L4	Q99733;Q99733-2, "Nucleosome assembly protein 1-like 4"	1.5553	0.0278417	0.381909
RPLP2	P05387, "60S acidic ribosomal protein P2"	1.4384	0.0364421	-0.278632
ATP1A1	P05023-3;P05023-4;P05023;P05023-2, "Sodium/potassium-transporting ATPase subunit alpha-1"	2.01772	0.0096003	-0.626015
HNRNPU	Q00839-2;Q00839, "Heterogeneous nuclear ribonucleoprotein U"	1.57048	0.0268859	-0.685608
DPYSL2	Q16555;Q16555-2, "Dihydropyrimidinase-related protein 2"	1.32432	0.0473888	-0.847502
YBX1	P67809, "Nuclease-sensitive element-binding protein 1"	1.3744	0.0422276	-1.03223
RPL13	P26373;P26373-2, "60S ribosomal protein L13"	1.79825	0.015913	-1.05051
RPL24	P83731, "60S ribosomal protein L24"	1.40151	0.039673	-1.11938
HIST1H4A	P62805, "Histone H4"	1.35919	0.0437334	-1.35094
CCT4	P50991;P50991-2, "T-complex protein 1 subunit delta"	1.45603	0.0349925	-1.48379
ALDH9A1	P49189;P49189-3;P49189-2, "4-trimethylaminobutyraldehyde dehydrogenase"	1.59376	0.0254822	-1.59262
RPL14	P50914, "60S ribosomal protein L14"	2.31475	0.00484448	-1.5999
H2AFY	O75367-2;O75367-3;O75367, "Core histone macro-H2A.1"	1.6146	0.0242885	-1.61728
RPL9	Q5IFJ7;P32969, "60S ribosomal protein L9"	2.19286	0.00641413	-1.77976
H1FX	Q92522, "Histone H1x"	1.56772	0.0270568	-2.11718
RPS8	P62241, "40S ribosomal protein S8"	2.26226	0.00546687	-2.1606
CPS1	P31327-3;P31327;P31327-2, "Carbamoyl-phosphate synthase [ammonia], mitochondrial"	1.44311	0.036049	-5.15972
The proteins were identified with a significance level P < 0.05 and ranked according to the fold change (Log2 FC).
