# Supplementary material for: Proteomic Profiling Identifies Specific Leukemic Stem Cell-Associated Protein Expression Patterns in Pediatric AML Patients
Source: Cancers (Basel). 2022 Jul 22;14(15):3567. doi: 10.3390/cancers14153567 (PMC9332109; doi:10.3390/cancers14153567)
Supplement: Supplementary file 1 [file cancers-14-03567-s001.zip › Table S5_Petersen et al.xlsx]

## Sheet: Table S7
Table S5: List of 62 differentially abundant proteins between PC1 and HSC samples
Gene names	Description	–Log10 (P-value)	P-value	Log2 FC					Majority protein IDs	Protein names
MCM2	P49736; "DNA replication licensing factor MCM2"	2.91393	0.00121919	3.63027					P49736;	"DNA replication licensing factor MCM2"
NUP210	Q8TEM1;Q8TEM1-2; "Nuclear pore membrane glycoprotein 210"	3.42793	0.000373313	3.11052					Q8TEM1;Q8TEM1-2;	"Nuclear pore membrane glycoprotein 210"
MCM6	Q14566; "DNA replication licensing factor MCM6"	2.11101	0.00774449	3.05117					Q14566;	"DNA replication licensing factor MCM6"
PCNA	P12004; "Proliferating cell nuclear antigen"	2.99359	0.00101486	2.95285					P12004;	"Proliferating cell nuclear antigen"
HLA-DRA	P01903; "HLA class II histocompatibility antigen, DR alpha chain"	2.89691	0.00126793	2.3136					P01903;	"HLA class II histocompatibility antigen, DR alpha chain"
CALR	P27797; "Calreticulin"	2.90066	0.001257	2.25027					P27797;	"Calreticulin"
PDIA6	Q15084-3;Q15084;Q15084-4;Q15084-5;Q15084-2; "Protein disulfide-isomerase A6"	1.7197	0.0190676	2.01205					Q15084-3;Q15084;Q15084-4;Q15084-5;Q15084-2;	"Protein disulfide-isomerase A6"
HNRNPA0	Q13151; "Heterogeneous nuclear ribonucleoprotein A0"	3.02636	0.000941117	1.98734					Q13151;	"Heterogeneous nuclear ribonucleoprotein A0"
STMN1	P16949;P16949-2; "Stathmin"	2.16591	0.00682483	1.92432					P16949;P16949-2;	"Stathmin"
NAPA	P54920; "Alpha-soluble NSF attachment protein"	2.35092	0.00445741	1.87813					P54920;	"Alpha-soluble NSF attachment protein"
ERP29	P30040; "Endoplasmic reticulum resident protein 29"	1.9291	0.0117733	1.82844					P30040;	"Endoplasmic reticulum resident protein 29"
CD74	P04233-2;P04233;P04233-3; "HLA class II histocompatibility antigen gamma chain"	1.73348	0.0184722	1.72948					P04233-2;P04233;P04233-3;	"HLA class II histocompatibility antigen gamma chain"
HLA-B	P01889; "HLA class I histocompatibility antigen, B-7 alpha chain"	1.42114	0.0379194	1.62693					P01889;	"HLA class I histocompatibility antigen, B-7 alpha chain"
PCBP1	Q15365; "Poly(rC)-binding protein 1"	2.40593	0.00392706	1.58957					Q15365;	"Poly(rC)-binding protein 1"
EIF6	P56537;P56537-2; "Eukaryotic translation initiation factor 6"	2.16474	0.00684324	1.58488					P56537;P56537-2;	"Eukaryotic translation initiation factor 6"
ACTR3	P61158; "Actin-related protein 3"	1.72647	0.0187729	1.56441					P61158;	"Actin-related protein 3"
TAGLN2	P37802-2;P37802; "Transgelin-2"	1.64635	0.0225759	1.52819					P37802-2;P37802;	"Transgelin-2"
CELF2	O95319-5;O95319-2;O95319;O95319-4;O95319-3; "CUGBP Elav-like family member 2"	1.71717	0.0191791	1.52443					O95319-5;O95319-2;O95319;O95319-4;O95319-3;	"CUGBP Elav-like family member 2"
NAP1L1	P55209;P55209-2;P55209-3; "Nucleosome assembly protein 1-like 1"	3.06671	0.000857617	1.50361					P55209;P55209-2;P55209-3;	"Nucleosome assembly protein 1-like 1"
RNH1	P13489; "Ribonuclease inhibitor"	2.1885	0.00647891	1.46899					P13489;	"Ribonuclease inhibitor"
ESYT1	Q9BSJ8;Q9BSJ8-2; "Extended synaptotagmin-1"	1.4762	0.0334042	1.42785					Q9BSJ8;Q9BSJ8-2;	"Extended synaptotagmin-1"
EEF1G	P26641;P26641-2; "Elongation factor 1-gamma"	2.20739	0.00620311	1.36901					P26641;P26641-2;	"Elongation factor 1-gamma"
EFHD2	Q96C19; "EF-hand domain-containing protein D2"	1.85503	0.0139628	1.34095					Q96C19;	"EF-hand domain-containing protein D2"
PAICS	P22234;P22234-2; "Multifunctional protein ADE2;Phosphoribosylaminoimidazole-succinocarboxamide synthase;Phosphoribosylaminoimidazole carboxylase"	1.56458	0.0272534	1.33228					P22234;P22234-2;	"Multifunctional protein ADE2;Phosphoribosylaminoimidazole-succinocarboxamide synthase;Phosphoribosylaminoimidazole carboxylase"
RUVBL2	Q9Y230;Q9Y230-2; "RuvB-like 2"	1.63938	0.0229416	1.29094					Q9Y230;Q9Y230-2;	"RuvB-like 2"
ACTR2	P61160;P61160-2; "Actin-related protein 2"	2.76238	0.0017283	1.27132					P61160;P61160-2;	"Actin-related protein 2"
IMPDH2	P12268; "Inosine-5-monophosphate dehydrogenase 2"	1.42973	0.0371768	1.24447					P12268;	"Inosine-5-monophosphate dehydrogenase 2"
RCC1	P18754;P18754-2; "Regulator of chromosome condensation"	3.25536	0.000555449	1.18777					P18754;P18754-2;	"Regulator of chromosome condensation"
DHX9	Q08211; "ATP-dependent RNA helicase A"	2.17475	0.00668723	1.1844					Q08211;	"ATP-dependent RNA helicase A"
FLNA	P21333-2;P21333; "Filamin-A"	1.80767	0.0155715	1.18427					P21333-2;P21333;	"Filamin-A"
EEF1B2	P24534; "Elongation factor 1-beta"	2.45012	0.00354717	1.13199					P24534;	"Elongation factor 1-beta"
GNB2L1	P63244; "Guanine nucleotide-binding protein subunit beta-2-like 1;Guanine nucleotide-binding protein subunit beta-2-like 1, N-terminally processed"	1.33851	0.0458662	1.12176					P63244;	"Guanine nucleotide-binding protein subunit beta-2-like 1;Guanine nucleotide-binding protein subunit beta-2-like 1, N-terminally processed"
CLIC1	O00299; "Chloride intracellular channel protein 1"	1.62229	0.023862	1.10858					O00299;	"Chloride intracellular channel protein 1"
DBNL	Q9UJU6;Q9UJU6-2;Q9UJU6-3;Q9UJU6-6; "Drebrin-like protein"	2.2828	0.00521433	1.10374					Q9UJU6;Q9UJU6-2;Q9UJU6-3;Q9UJU6-6;	"Drebrin-like protein"
TUFM	P49411; "Elongation factor Tu, mitochondrial"	1.54723	0.0283642	0.944131					P49411;	"Elongation factor Tu, mitochondrial"
SF3A1	Q15459;Q15459-2; "Splicing factor 3A subunit 1"	1.36939	0.0427182	0.935337					Q15459;Q15459-2;	"Splicing factor 3A subunit 1"
NONO	Q15233;Q15233-2; "Non-POU domain-containing octamer-binding protein"	1.35614	0.0440411	0.80909					Q15233;Q15233-2;	"Non-POU domain-containing octamer-binding protein"
HNRNPAB	Q99729-3;Q99729-2;Q99729-4;Q99729; "Heterogeneous nuclear ribonucleoprotein A/B"	1.34536	0.0451482	0.797722					Q99729-3;Q99729-2;Q99729-4;Q99729;	"Heterogeneous nuclear ribonucleoprotein A/B"
ELAVL1	Q15717;Q15717-2; "ELAV-like protein 1"	1.5598	0.0275547	0.760963					Q15717;Q15717-2;	"ELAV-like protein 1"
LCP1	P13796; "Plastin-2"	1.9352	0.011609	0.746792					P13796;	"Plastin-2"
SEC13	P55735;P55735-2;P55735-4;P55735-3; "Protein SEC13 homolog"	1.56725	0.0270862	0.709085					P55735;P55735-2;P55735-4;P55735-3;	"Protein SEC13 homolog"
TUBB	P07437; "Tubulin beta chain"	1.8866	0.0129838	0.695929					P07437;	"Tubulin beta chain"
RPN1	P04843; "Dolichyl-diphosphooligosaccharide--protein glycosyltransferase subunit 1"	1.71026	0.0194868	0.695648					P04843;	"Dolichyl-diphosphooligosaccharide--protein glycosyltransferase subunit 1"
PSMA4	P25789;P25789-2; "Proteasome subunit alpha type-4"	1.82713	0.0148891	0.588468					P25789;P25789-2;	"Proteasome subunit alpha type-4"
HNRNPDL	O14979-3;O14979-2;O14979; "Heterogeneous nuclear ribonucleoprotein D-like"	2.24543	0.00568293	0.570268					O14979-3;O14979-2;O14979;	"Heterogeneous nuclear ribonucleoprotein D-like"
FUBP1	Q96AE4;Q96AE4-2; "Far upstream element-binding protein 1"	1.58184	0.0261913	0.53879					Q96AE4;Q96AE4-2;	"Far upstream element-binding protein 1"
RPLP2	P05387; "60S acidic ribosomal protein P2"	1.41488	0.0384696	0.527557					P05387;	"60S acidic ribosomal protein P2"
BUB3	O43684-2;O43684; "Mitotic checkpoint protein BUB3"	2.57766	0.00264448	0.365313					O43684-2;O43684;	"Mitotic checkpoint protein BUB3"
RPL14	P50914; "60S ribosomal protein L14"	1.70639	0.0196614	-1.01142					P50914;	"60S ribosomal protein L14"
HSPA1A;HSPA1B	P0DMV8;P0DMV9;P0DMV8-2; "Heat shock 70 kDa protein 1A;Heat shock 70 kDa protein 1B"	3.07734	0.000836873	-1.24213					P0DMV8;P0DMV9;P0DMV8-2;	"Heat shock 70 kDa protein 1A;Heat shock 70 kDa protein 1B"
TALDO1	P37837; "Transaldolase"	2.02958	0.0093416	-1.49388					P37837;	"Transaldolase"
H2AFY	O75367-2;O75367-3;O75367; "Core histone macro-H2A.1"	3.20258	0.000627222	-1.49978					O75367-2;O75367-3;O75367;	"Core histone macro-H2A.1"
LTA4H	P09960;P09960-4;P09960-2;P09960-3; "Leukotriene A-4 hydrolase"	3.59244	0.0002556	-1.75599					P09960;P09960-4;P09960-2;P09960-3;	"Leukotriene A-4 hydrolase"
HIST1H4A	P62805; "Histone H4"	2.33831	0.00458875	-1.81897					P62805;	"Histone H4"
ALDH9A1	P49189;P49189-3;P49189-2; "4-trimethylaminobutyraldehyde dehydrogenase"	2.04721	0.00897002	-1.96489					P49189;P49189-3;P49189-2;	"4-trimethylaminobutyraldehyde dehydrogenase"
SPTAN1	Q13813;Q13813-3;Q13813-2; "Spectrin alpha chain, non-erythrocytic 1"	1.98621	0.0103226	-2.01642					Q13813;Q13813-3;Q13813-2;	"Spectrin alpha chain, non-erythrocytic 1"
LMNB2	Q03252; "Lamin-B2"	2.33658	0.00460707	-2.04277					Q03252;	"Lamin-B2"
H1FX	Q92522; "Histone H1x"	2.29542	0.00506497	-2.21495					Q92522;	"Histone H1x"
SOD2	P04179;P04179-3;P04179-4;P04179-2; "Superoxide dismutase [Mn], mitochondrial"	2.31607	0.00482977	-2.3988					P04179;P04179-3;P04179-4;P04179-2;	"Superoxide dismutase [Mn], mitochondrial"
HSPB1	P04792; "Heat shock protein beta-1"	3.05534	0.000880362	-2.68102					P04792;	"Heat shock protein beta-1"
SPTBN1	Q01082;Q01082-3;Q01082-2; "Spectrin beta chain, non-erythrocytic 1"	1.98478	0.0103567	-2.68983					Q01082;Q01082-3;Q01082-2;	"Spectrin beta chain, non-erythrocytic 1"
CPS1	P31327-3;P31327;P31327-2; "Carbamoyl-phosphate synthase [ammonia], mitochondrial"	1.34057	0.045649	-4.03256					P31327-3;P31327;P31327-2;	"Carbamoyl-phosphate synthase [ammonia], mitochondrial"
The proteins were identified with a significance level P < 0.05 and ranked according to the fold change (Log2 FC).
