# Supplementary material for: Proteomic Profiling Identifies Specific Leukemic Stem Cell-Associated Protein Expression Patterns in Pediatric AML Patients
Source: Cancers (Basel). 2022 Jul 22;14(15):3567. doi: 10.3390/cancers14153567 (PMC9332109; doi:10.3390/cancers14153567)
Supplement: Supplementary file 1 [file cancers-14-03567-s001.zip › Table S6_Petersen et al.xlsx]

## Sheet: Table S8
Table S6. List of 132 differentially abundant proteins between BC1 and HSC samples
Gene names	Description	–Log10 (P-value)	P-value	Log2 FC				Majority protein IDs	Protein names
AHNAK	Q09666; "Neuroblast differentiation-associated protein AHNAK"	1.847	0.0142233	3.59672				Q09666;	"Neuroblast differentiation-associated protein AHNAK"
NUP210	Q8TEM1;Q8TEM1-2; "Nuclear pore membrane glycoprotein 210"	4.17168	6.73479e-05	3.48902				Q8TEM1;Q8TEM1-2;	"Nuclear pore membrane glycoprotein 210"
MCM2	P49736; "DNA replication licensing factor MCM2"	3.08766	0.000817229	3.40295				P49736;	"DNA replication licensing factor MCM2"
PCNA	P12004; "Proliferating cell nuclear antigen"	3.15914	0.00069321	3.12223				P12004;	"Proliferating cell nuclear antigen"
RNH1	P13489; "Ribonuclease inhibitor"	2.98075	0.00104533	2.96855				P13489;	"Ribonuclease inhibitor"
ATIC	P31939;P31939-2; "Bifunctional purine biosynthesis protein PURH;Phosphoribosylaminoimidazolecarboxamide formyltransferase;IMP cyclohydrolase"	1.97602	0.0105677	2.94899				P31939;P31939-2;	"Bifunctional purine biosynthesis protein PURH;Phosphoribosylaminoimidazolecarboxamide formyltransferase;IMP cyclohydrolase"
ACTR3	P61158; "Actin-related protein 3"	3.01079	0.000975461	2.88001				P61158;	"Actin-related protein 3"
PDIA6	Q15084-3;Q15084;Q15084-4;Q15084-5;Q15084-2; "Protein disulfide-isomerase A6"	2.06296	0.00865049	2.79868				Q15084-3;Q15084;Q15084-4;Q15084-5;Q15084-2;	"Protein disulfide-isomerase A6"
ACTN1	P12814;P12814-2;P12814-3;P12814-4; "Alpha-actinin-1"	3.00507	0.000988398	2.7718				P12814;P12814-2;P12814-3;P12814-4;	"Alpha-actinin-1"
ERP29	P30040; "Endoplasmic reticulum resident protein 29"	3.36838	0.000428172	2.75881				P30040;	"Endoplasmic reticulum resident protein 29"
ILF2	Q12905; "Interleukin enhancer-binding factor 2"	1.66975	0.021392	2.75652				Q12905;	"Interleukin enhancer-binding factor 2"
KPNB1	Q14974;Q14974-2; "Importin subunit beta-1"	1.62707	0.0236012	2.73937				Q14974;Q14974-2;	"Importin subunit beta-1"
NAPA	P54920; "Alpha-soluble NSF attachment protein"	3.71755	0.000191625	2.71637				P54920;	"Alpha-soluble NSF attachment protein"
TLN1	Q9Y490; "Talin-1"	2.80163	0.00157894	2.60126				Q9Y490;	"Talin-1"
HLA-DRA	P01903; "HLA class II histocompatibility antigen, DR alpha chain"	1.80053	0.0158296	2.59355				P01903;	"HLA class II histocompatibility antigen, DR alpha chain"
FLNA	P21333-2;P21333; "Filamin-A"	2.73615	0.00183591	2.50572				P21333-2;P21333;	"Filamin-A"
MCM6	Q14566; "DNA replication licensing factor MCM6"	1.35656	0.0439991	2.50486				Q14566;	"DNA replication licensing factor MCM6"
GANAB	Q14697-2;Q14697; "Neutral alpha-glucosidase AB"	1.39307	0.0404507	2.5025				Q14697-2;Q14697;	"Neutral alpha-glucosidase AB"
ACTR2	P61160;P61160-2; "Actin-related protein 2"	3.90014	0.000125852	2.32267				P61160;P61160-2;	"Actin-related protein 2"
PDCD6IP	Q8WUM4;Q8WUM4-2; "Programmed cell death 6-interacting protein"	1.45496	0.0350785	2.26607				Q8WUM4;Q8WUM4-2;	"Programmed cell death 6-interacting protein"
HNRNPA0	Q13151; "Heterogeneous nuclear ribonucleoprotein A0"	3.18759	0.000649251	2.24953				Q13151;	"Heterogeneous nuclear ribonucleoprotein A0"
CALR	P27797; "Calreticulin"	2.52565	0.00298089	2.23605				P27797;	"Calreticulin"
ESYT1	Q9BSJ8;Q9BSJ8-2; "Extended synaptotagmin-1"	2.19509	0.00638129	2.14329				Q9BSJ8;Q9BSJ8-2;	"Extended synaptotagmin-1"
STMN1	P16949;P16949-2; "Stathmin"	2.94775	0.00112786	2.0979				P16949;P16949-2;	"Stathmin"
RPLP0;RPLP0P6	P05388;P05388-2;Q8NHW5; "60S acidic ribosomal protein P0;60S acidic ribosomal protein P0-like"	1.62162	0.0238988	2.059				P05388;P05388-2;Q8NHW5;	"60S acidic ribosomal protein P0;60S acidic ribosomal protein P0-like"
NME2;NME1	P22392-2;P22392;P15531;P15531-2; "Nucleoside diphosphate kinase B;Nucleoside diphosphate kinase A"	1.49418	0.0320493	2.03843				P22392-2;P22392;P15531;P15531-2;	"Nucleoside diphosphate kinase B;Nucleoside diphosphate kinase A"
CAPG	P40121;P40121-2; "Macrophage-capping protein"	1.74446	0.0180109	1.97582				P40121;P40121-2;	"Macrophage-capping protein"
EFHD2	Q96C19; "EF-hand domain-containing protein D2"	1.92462	0.0118954	1.96682				Q96C19;	"EF-hand domain-containing protein D2"
ATP6V1A	P38606;P38606-2; "V-type proton ATPase catalytic subunit A"	2.28398	0.00520016	1.95914				P38606;P38606-2;	"V-type proton ATPase catalytic subunit A"
CD74	P04233-2;P04233;P04233-3; "HLA class II histocompatibility antigen gamma chain"	1.54419	0.0285637	1.92768				P04233-2;P04233;P04233-3;	"HLA class II histocompatibility antigen gamma chain"
CORO1A	P31146; "Coronin-1A"	1.61229	0.0244178	1.81512				P31146;	"Coronin-1A"
HSPH1	Q92598-3;Q92598;Q92598-2;Q92598-4; "Heat shock protein 105 kDa"	1.36264	0.0433874	1.80092				Q92598-3;Q92598;Q92598-2;Q92598-4;	"Heat shock protein 105 kDa"
TAGLN2	P37802-2;P37802; "Transgelin-2"	2.21816	0.00605123	1.77224				P37802-2;P37802;	"Transgelin-2"
PSMD1	Q99460-2;Q99460; "26S proteasome non-ATPase regulatory subunit 1"	1.78962	0.0162321	1.75031				Q99460-2;Q99460;	"26S proteasome non-ATPase regulatory subunit 1"
STRAP	Q9Y3F4;Q9Y3F4-2; "Serine-threonine kinase receptor-associated protein"	1.30847	0.0491508	1.708				Q9Y3F4;Q9Y3F4-2;	"Serine-threonine kinase receptor-associated protein"
HCLS1	P14317; "Hematopoietic lineage cell-specific protein"	1.40888	0.039005	1.68382				P14317;	"Hematopoietic lineage cell-specific protein"
ACAT1	P24752; "Acetyl-CoA acetyltransferase, mitochondrial"	1.5571	0.0277266	1.68262				P24752;	"Acetyl-CoA acetyltransferase, mitochondrial"
PCBP1	Q15365; "Poly(rC)-binding protein 1"	2.41718	0.00382669	1.68007				Q15365;	"Poly(rC)-binding protein 1"
DBNL	Q9UJU6;Q9UJU6-2;Q9UJU6-3;Q9UJU6-6; "Drebrin-like protein"	2.16651	0.00681539	1.67598				Q9UJU6;Q9UJU6-2;Q9UJU6-3;Q9UJU6-6;	"Drebrin-like protein"
CELF2	O95319-5;O95319-2;O95319;O95319-4;O95319-3; "CUGBP Elav-like family member 2"	1.41068	0.0388439	1.67466				O95319-5;O95319-2;O95319;O95319-4;O95319-3;	"CUGBP Elav-like family member 2"
LCP1	P13796; "Plastin-2"	3.15547	0.000699088	1.66822				P13796;	"Plastin-2"
ANXA11	P50995-2;P50995; "Annexin A11"	2.43127	0.00370446	1.65852				P50995-2;P50995;	"Annexin A11"
RPL12	P30050;P30050-2; "60S ribosomal protein L12"	1.89575	0.0127131	1.64423				P30050;P30050-2;	"60S ribosomal protein L12"
ACADVL	P49748-2;P49748;P49748-3; "Very long-chain specific acyl-CoA dehydrogenase, mitochondrial"	1.69948	0.0199767	1.63651				P49748-2;P49748;P49748-3;	"Very long-chain specific acyl-CoA dehydrogenase, mitochondrial"
IMPDH2	P12268; "Inosine-5-monophosphate dehydrogenase 2"	4.41712	3.82717e-05	1.62746				P12268;	"Inosine-5-monophosphate dehydrogenase 2"
PGD	P52209-2;P52209; "6-phosphogluconate dehydrogenase, decarboxylating"	2.36642	0.00430108	1.62602				P52209-2;P52209;	"6-phosphogluconate dehydrogenase, decarboxylating"
EIF6	P56537;P56537-2; "Eukaryotic translation initiation factor 6"	1.49804	0.031766	1.62021				P56537;P56537-2;	"Eukaryotic translation initiation factor 6"
UQCRC2	P22695; "Cytochrome b-c1 complex subunit 2, mitochondrial"	1.62621	0.0236478	1.59811				P22695;	"Cytochrome b-c1 complex subunit 2, mitochondrial"
EFTUD2	Q15029-2;Q15029-3;Q15029; "116 kDa U5 small nuclear ribonucleoprotein component"	1.3803	0.0416578	1.58687				Q15029-2;Q15029-3;Q15029;	"116 kDa U5 small nuclear ribonucleoprotein component"
CAP1	Q01518;Q01518-2; "Adenylyl cyclase-associated protein 1"	2.21139	0.00614625	1.56537				Q01518;Q01518-2;	"Adenylyl cyclase-associated protein 1"
MAT2B	Q9NZL9-3;Q9NZL9;Q9NZL9-4;Q9NZL9-2; "Methionine adenosyltransferase 2 subunit beta"	1.74698	0.017907	1.54315				Q9NZL9-3;Q9NZL9;Q9NZL9-4;Q9NZL9-2;	"Methionine adenosyltransferase 2 subunit beta"
CCT6A	P40227;P40227-2; "T-complex protein 1 subunit zeta"	1.40012	0.0397999	1.53827				P40227;P40227-2;	"T-complex protein 1 subunit zeta"
CLIC1	O00299; "Chloride intracellular channel protein 1"	5.11712	7.63625e-06	1.52456				O00299;	"Chloride intracellular channel protein 1"
UBE2V1	Q13404;Q13404-7;Q13404-2;Q13404-1;Q13404-8;Q13404-6; "Ubiquitin-conjugating enzyme E2 variant 1"	1.33722	0.046002	1.49508				Q13404;Q13404-7;Q13404-2;Q13404-1;Q13404-8;Q13404-6;	"Ubiquitin-conjugating enzyme E2 variant 1"
PPIB	P23284; "Peptidyl-prolyl cis-trans isomerase B"	1.97421	0.0106118	1.44426				P23284;	"Peptidyl-prolyl cis-trans isomerase B"
EEF1G	P26641;P26641-2; "Elongation factor 1-gamma"	2.42972	0.00371776	1.43966				P26641;P26641-2;	"Elongation factor 1-gamma"
NAP1L1	P55209;P55209-2;P55209-3; "Nucleosome assembly protein 1-like 1"	2.17483	0.00668609	1.42218				P55209;P55209-2;P55209-3;	"Nucleosome assembly protein 1-like 1"
AK2	P54819-2;P54819;P54819-5;P54819-3;P54819-6;P54819-4; "Adenylate kinase 2, mitochondrial;Adenylate kinase 2, mitochondrial, N-terminally processed"	1.38514	0.0411963	1.41575				P54819-2;P54819;P54819-5;P54819-3;P54819-6;P54819-4;	"Adenylate kinase 2, mitochondrial;Adenylate kinase 2, mitochondrial, N-terminally processed"
RBBP4	Q09028-3;Q09028;Q09028-4;Q09028-2; "Histone-binding protein RBBP4"	1.76231	0.017286	1.41014				Q09028-3;Q09028;Q09028-4;Q09028-2;	"Histone-binding protein RBBP4"
PABPC1	P11940-2;P11940; "Polyadenylate-binding protein 1"	1.58139	0.0262187	1.40699				P11940-2;P11940;	"Polyadenylate-binding protein 1"
CPSF6	Q16630-3;Q16630;Q16630-2; "Cleavage and polyadenylation specificity factor subunit 6"	1.73459	0.018425	1.39155				Q16630-3;Q16630;Q16630-2;	"Cleavage and polyadenylation specificity factor subunit 6"
HSP90B1	P14625; "Endoplasmin"	1.70249	0.0198383	1.38584				P14625;	"Endoplasmin"
VCL	P18206;P18206-2; "Vinculin"	2.25483	0.00556121	1.35714				P18206;P18206-2;	"Vinculin"
RUVBL2	Q9Y230;Q9Y230-2; "RuvB-like 2"	1.45357	0.0351907	1.33766				Q9Y230;Q9Y230-2;	"RuvB-like 2"
DHX9	Q08211; "ATP-dependent RNA helicase A"	2.01751	0.00960473	1.33234				Q08211;	"ATP-dependent RNA helicase A"
PPP2CA;PPP2CB	P67775;P62714;P67775-2; "Serine/threonine-protein phosphatase 2A catalytic subunit alpha isoform;Serine/threonine-protein phosphatase 2A catalytic subunit beta isoform"	1.53141	0.0294166	1.32889				P67775;P62714;P67775-2;	"Serine/threonine-protein phosphatase 2A catalytic subunit alpha isoform;Serine/threonine-protein phosphatase 2A catalytic subunit beta isoform"
ACTB;ACTG1	P60709;P63261; "Actin, cytoplasmic 1;Actin, cytoplasmic 1, N-terminally processed;Actin, cytoplasmic 2;Actin, cytoplasmic 2, N-terminally processed"	1.61129	0.0244742	1.31851				P60709;P63261;	"Actin, cytoplasmic 1;Actin, cytoplasmic 1, N-terminally processed;Actin, cytoplasmic 2;Actin, cytoplasmic 2, N-terminally processed"
PPP1CA	P62136-2;P62136;P62136-3; "Serine/threonine-protein phosphatase PP1-alpha catalytic subunit"	2.94585	0.0011328	1.31759				P62136-2;P62136;P62136-3;	"Serine/threonine-protein phosphatase PP1-alpha catalytic subunit"
EEF1B2	P24534; "Elongation factor 1-beta"	3.87674	0.000132818	1.3115				P24534;	"Elongation factor 1-beta"
RCC1	P18754;P18754-2; "Regulator of chromosome condensation"	3.52188	0.00030069	1.21805				P18754;P18754-2;	"Regulator of chromosome condensation"
ARPC2	O15144; "Actin-related protein 2/3 complex subunit 2"	2.25568	0.00555037	1.20803				O15144;	"Actin-related protein 2/3 complex subunit 2"
PDIA4	P13667; "Protein disulfide-isomerase A4"	2.45294	0.0035242	1.19299				P13667;	"Protein disulfide-isomerase A4"
TXNDC17	Q9BRA2; "Thioredoxin domain-containing protein 17"	2.06858	0.00853924	1.1801				Q9BRA2;	"Thioredoxin domain-containing protein 17"
SYNCRIP	O60506-2;O60506;O60506-4;O60506-3;O60506-5; "Heterogeneous nuclear ribonucleoprotein Q"	1.34627	0.0450539	1.17682				O60506-2;O60506;O60506-4;O60506-3;O60506-5;	"Heterogeneous nuclear ribonucleoprotein Q"
GNB2L1	P63244; "Guanine nucleotide-binding protein subunit beta-2-like 1;Guanine nucleotide-binding protein subunit beta-2-like 1, N-terminally processed"	1.49162	0.0322386	1.16549				P63244;	"Guanine nucleotide-binding protein subunit beta-2-like 1;Guanine nucleotide-binding protein subunit beta-2-like 1, N-terminally processed"
TUBB	P07437; "Tubulin beta chain"	3.76981	0.000169898	1.15108				P07437;	"Tubulin beta chain"
TUFM	P49411; "Elongation factor Tu, mitochondrial"	2.04243	0.00906926	1.13091				P49411;	"Elongation factor Tu, mitochondrial"
SEC13	P55735;P55735-2;P55735-4;P55735-3; "Protein SEC13 homolog"	1.68998	0.0204181	1.128				P55735;P55735-2;P55735-4;P55735-3;	"Protein SEC13 homolog"
TXNDC12	O95881; "Thioredoxin domain-containing protein 12"	3.12988	0.000741515	1.09204				O95881;	"Thioredoxin domain-containing protein 12"
RPN1	P04843; "Dolichyl-diphosphooligosaccharide--protein glycosyltransferase subunit 1"	2.63933	0.00229438	1.05193				P04843;	"Dolichyl-diphosphooligosaccharide--protein glycosyltransferase subunit 1"
NUDT5	Q9UKK9; "ADP-sugar pyrophosphatase"	1.34936	0.0447338	1.04245				Q9UKK9;	"ADP-sugar pyrophosphatase"
GPI	P06744;P06744-2; "Glucose-6-phosphate isomerase"	1.50916	0.0309627	1.02082				P06744;P06744-2;	"Glucose-6-phosphate isomerase"
PFDN2	Q9UHV9; "Prefoldin subunit 2"	2.59547	0.00253822	0.994546				Q9UHV9;	"Prefoldin subunit 2"
PSMA5	P28066;P28066-2; "Proteasome subunit alpha type-5"	1.55632	0.0277766	0.985398				P28066;P28066-2;	"Proteasome subunit alpha type-5"
CFL1	P23528; "Cofilin-1"	1.79612	0.0159911	0.978529				P23528;	"Cofilin-1"
EEF2	P13639; "Elongation factor 2"	1.91743	0.0120941	0.973946				P13639;	"Elongation factor 2"
TPI1	P60174;P60174-1;P60174-4; "Triosephosphate isomerase"	2.22093	0.00601266	0.9738				P60174;P60174-1;P60174-4;	"Triosephosphate isomerase"
SF3A1	Q15459;Q15459-2; "Splicing factor 3A subunit 1"	1.50826	0.0310269	0.956191				Q15459;Q15459-2;	"Splicing factor 3A subunit 1"
PDIA3	P30101; "Protein disulfide-isomerase A3"	1.97667	0.0105519	0.954365				P30101;	"Protein disulfide-isomerase A3"
HNRNPA3	P51991-2;P51991; "Heterogeneous nuclear ribonucleoprotein A3"	1.3209	0.0477638	0.910879				P51991-2;P51991;	"Heterogeneous nuclear ribonucleoprotein A3"
LAMTOR5	O43504; "Ragulator complex protein LAMTOR5"	2.16638	0.00681737	0.85005				O43504;	"Ragulator complex protein LAMTOR5"
DDX17	Q92841;Q92841-1;Q92841-3;Q92841-2; "Probable ATP-dependent RNA helicase DDX17"	1.52713	0.0297075	0.823622				Q92841;Q92841-1;Q92841-3;Q92841-2;	"Probable ATP-dependent RNA helicase DDX17"
SRP9	P49458;P49458-2; "Signal recognition particle 9 kDa protein"	1.41088	0.038826	0.776745				P49458;P49458-2;	"Signal recognition particle 9 kDa protein"
ARPC4	P59998;P59998-3;P59998-2;P59998-4; "Actin-related protein 2/3 complex subunit 4"	1.81958	0.0151503	0.762611				P59998;P59998-3;P59998-2;P59998-4;	"Actin-related protein 2/3 complex subunit 4"
SRSF2	Q01130-2;Q01130; "Serine/arginine-rich splicing factor 2"	1.90751	0.0123734	0.738905				Q01130-2;Q01130;	"Serine/arginine-rich splicing factor 2"
KHSRP	Q92945; "Far upstream element-binding protein 2"	1.5417	0.0287275	0.59567				Q92945;	"Far upstream element-binding protein 2"
PSMA4	P25789;P25789-2; "Proteasome subunit alpha type-4"	1.50027	0.0316031	0.571683				P25789;P25789-2;	"Proteasome subunit alpha type-4"
ELAVL1	Q15717;Q15717-2; "ELAV-like protein 1"	1.97942	0.0104852	0.570642				Q15717;Q15717-2;	"ELAV-like protein 1"
HNRNPD	Q14103-4;Q14103-3;Q14103-2;Q14103; "Heterogeneous nuclear ribonucleoprotein D0"	1.36409	0.0432428	0.569727				Q14103-4;Q14103-3;Q14103-2;Q14103;	"Heterogeneous nuclear ribonucleoprotein D0"
PUF60	Q9UHX1-4;Q9UHX1-6;Q9UHX1-2;Q9UHX1-3;Q9UHX1-5;Q9UHX1; "Poly(U)-binding-splicing factor PUF60"	1.56188	0.0274235	0.546247				Q9UHX1-4;Q9UHX1-6;Q9UHX1-2;Q9UHX1-3;Q9UHX1-5;Q9UHX1;	"Poly(U)-binding-splicing factor PUF60"
SH3BGRL	O75368; "SH3 domain-binding glutamic acid-rich-like protein"	1.46652	0.0341567	0.488525				O75368;	"SH3 domain-binding glutamic acid-rich-like protein"
NAP1L4	Q99733;Q99733-2; "Nucleosome assembly protein 1-like 4"	1.30973	0.0490087	0.461134				Q99733;Q99733-2;	"Nucleosome assembly protein 1-like 4"
SF3B3	Q15393; "Splicing factor 3B subunit 3"	1.404	0.0394458	0.442889				Q15393;	"Splicing factor 3B subunit 3"
COPB2	P35606-2;P35606; "Coatomer subunit beta"	1.7532	0.0176521	-0.780502				P35606-2;P35606;	"Coatomer subunit beta"
CAPZA2	P47755;P47755-2; "F-actin-capping protein subunit alpha-2"	1.42723	0.0373908	-0.807606				P47755;P47755-2;	"F-actin-capping protein subunit alpha-2"
YWHAQ	P27348; "14-3-3 protein theta"	1.83088	0.0147612	-0.994052				P27348;	"14-3-3 protein theta"
BLMH	Q13867; "Bleomycin hydrolase"	2.08041	0.00830982	-1.00954				Q13867;	"Bleomycin hydrolase"
ABHD10	Q9NUJ1;Q9NUJ1-2; "Mycophenolic acid acyl-glucuronide esterase, mitochondrial"	1.44132	0.036198	-1.01642				Q9NUJ1;Q9NUJ1-2;	"Mycophenolic acid acyl-glucuronide esterase, mitochondrial"
RPL9	Q5IFJ7;P32969; "60S ribosomal protein L9"	1.61476	0.0242795	-1.09294				Q5IFJ7;P32969;	"60S ribosomal protein L9"
PTMA	P06454-2;P06454; "Prothymosin alpha;Prothymosin alpha, N-terminally processed;Thymosin alpha-1"	1.53781	0.0289862	-1.10129				P06454-2;P06454;	"Prothymosin alpha;Prothymosin alpha, N-terminally processed;Thymosin alpha-1"
HSPA1A;HSPA1B	P0DMV8;P0DMV9;P0DMV8-2; "Heat shock 70 kDa protein 1A;Heat shock 70 kDa protein 1B"	2.00647	0.00985213	-1.15207				P0DMV8;P0DMV9;P0DMV8-2;	"Heat shock 70 kDa protein 1A;Heat shock 70 kDa protein 1B"
PEBP1	P30086; "Phosphatidylethanolamine-binding protein 1;Hippocampal cholinergic neurostimulating peptide"	2.36251	0.00434001	-1.21676				P30086;	"Phosphatidylethanolamine-binding protein 1;Hippocampal cholinergic neurostimulating peptide"
S100A7	P31151; "Protein S100-A7"	1.33929	0.0457834	-1.34929				P31151;	"Protein S100-A7"
RPL14	P50914; "60S ribosomal protein L14"	3.18886	0.00064735	-1.35103				P50914;	"60S ribosomal protein L14"
CALML3	P27482; "Calmodulin-like protein 3"	3.81382	0.000153526	-1.42393				P27482;	"Calmodulin-like protein 3"
RPS8	P62241; "40S ribosomal protein S8"	1.74345	0.0180531	-1.4306				P62241;	"40S ribosomal protein S8"
SERPINB1	P30740;P30740-2; "Leukocyte elastase inhibitor"	1.55312	0.027982	-1.44683				P30740;P30740-2;	"Leukocyte elastase inhibitor"
TALDO1	P37837; "Transaldolase"	2.59457	0.00254351	-1.49184				P37837;	"Transaldolase"
H2AFY	O75367-2;O75367-3;O75367; "Core histone macro-H2A.1"	2.38428	0.00412783	-1.74108				O75367-2;O75367-3;O75367;	"Core histone macro-H2A.1"
ALDH9A1	P49189;P49189-3;P49189-2; "4-trimethylaminobutyraldehyde dehydrogenase"	1.79871	0.0158961	-1.77238				P49189;P49189-3;P49189-2;	"4-trimethylaminobutyraldehyde dehydrogenase"
CALM3	P0DP25;P0DP24;P0DP23; "Calmodulin-3"	1.70567	0.0196937	-1.87535				P0DP25;P0DP24;P0DP23;	"Calmodulin-3"
PIP	P12273; "Prolactin-inducible protein"	1.74807	0.0178619	-1.89102				P12273;	"Prolactin-inducible protein"
LMNB2	Q03252; "Lamin-B2"	1.88151	0.0131367	-1.90446				Q03252;	"Lamin-B2"
ARG1	P05089-2;P05089;P05089-3; "Arginase-1"	1.73062	0.0185945	-1.96315				P05089-2;P05089;P05089-3;	"Arginase-1"
PRDX1	Q06830; "Peroxiredoxin-1"	2.70761	0.0019606	-2.11777				Q06830;	"Peroxiredoxin-1"
HIST1H4A	P62805; "Histone H4"	3.746	0.000179473	-2.1433				P62805;	"Histone H4"
PARP1	P09874; "Poly [ADP-ribose] polymerase 1"	1.51434	0.0305953	-2.27636				P09874;	"Poly [ADP-ribose] polymerase 1"
H1FX	Q92522; "Histone H1x"	3.12301	0.00075334	-2.66277				Q92522;	"Histone H1x"
CALML5	Q9NZT1; "Calmodulin-like protein 5"	1.39454	0.040314	-2.72729				Q9NZT1;	"Calmodulin-like protein 5"
HSPB1	P04792; "Heat shock protein beta-1"	2.39385	0.00403786	-2.7744				P04792;	"Heat shock protein beta-1"
SOD2	P04179;P04179-3;P04179-4;P04179-2; "Superoxide dismutase [Mn], mitochondrial"	3.51585	0.000304897	-3.44503				P04179;P04179-3;P04179-4;P04179-2;	"Superoxide dismutase [Mn], mitochondrial"
CPS1	P31327-3;P31327;P31327-2; "Carbamoyl-phosphate synthase [ammonia], mitochondrial"	1.41495	0.0384634	-5.01815				P31327-3;P31327;P31327-2;	"Carbamoyl-phosphate synthase [ammonia], mitochondrial"
The proteins were identified with a significance level P < 0.05 and ranked according to the fold change (Log2 FC).
