# Supplementary material for: Proteomic Profiling Identifies Specific Leukemic Stem Cell-Associated Protein Expression Patterns in Pediatric AML Patients
Source: Cancers (Basel). 2022 Jul 22;14(15):3567. doi: 10.3390/cancers14153567 (PMC9332109; doi:10.3390/cancers14153567)
Supplement: Supplementary file 1 [file cancers-14-03567-s001.zip › Table S7_Petersen et al.xlsx]

## Sheet: Table S9
Table S7. List of 17 shared differentially abundant proteins between AML-SC, PC1, and BC1 compared to HSC samples
Gene names	Description
NUP210	Q8TEM1;Q8TEM1-2, "Nuclear pore membrane glycoprotein 210"
RNH1	P13489, "Ribonuclease inhibitor"
NAPA	P54920, "Alpha-soluble NSF attachment protein"
ACTR2	P61160;P61160-2, "Actin-related protein 2"
HNRNPA0	Q13151, "Heterogeneous nuclear ribonucleoprotein A0"
TAGLN2	P37802-2;P37802, "Transgelin-2"
PCBP1	Q15365, "Poly(rC)-binding protein 1"
EIF6	P56537;P56537-2, "Eukaryotic translation initiation factor 6"
HLA-DR	P01903, "HLA class II histocompatibility antigen, DR alpha chain"
CELF2	O95319-5;O95319-2;O95319;O95319-4;O95319-3, "CUGBP Elav-like family member 2"
DHX9	Q08211, "ATP-dependent RNA helicase A"
RPL14	P50914, "60S ribosomal protein L14"
H2AFY	O75367-2;O75367-3;O75367, "Core histone macro-H2A.1"
ALDH9A1	P49189;P49189-3;P49189-2, "4-trimethylaminobutyraldehyde dehydrogenase"
HIST1H4A	P62805, "Histone H4"
H1FX	Q92522, "Histone H1x"
CPS1	P31327-3;P31327;P31327-2, "Carbamoyl-phosphate synthase [ammonia], mitochondrial"
The protein identifications were either upregulated (red) or downregulated (green) in all analyzes
