# Supplementary material for: Proteomic Profiling Identifies Specific Leukemic Stem Cell-Associated Protein Expression Patterns in Pediatric AML Patients
Source: Cancers (Basel). 2022 Jul 22;14(15):3567. doi: 10.3390/cancers14153567 (PMC9332109; doi:10.3390/cancers14153567)
Supplement: Supplementary file 1 [file cancers-14-03567-s001.zip › Table S8_Petersen et al.xlsx]

## Sheet: Table S10
Table S8. List of 10 unique differentially abundant proteins in AML-SC compared to HSC samples
Gene names	Description
HSPE1	P61604, "10 kDa heat shock protein, mitochondrial"
SRSF1	Q07955-3;Q07955;Q07955-2, "Serine/arginine-rich splicing factor 1"
CBX3	Q13185, "Chromobox protein homolog 3"
ATP1A1	P05023-3;P05023-4;P05023;P05023-2, "Sodium/potassium-transporting ATPase subunit alpha-1"
DPYSL2	Q16555;Q16555-2, "Dihydropyrimidinase-related protein 2"
YBX1	P67809, "Nuclease-sensitive element-binding protein 1"
RPL13	P26373;P26373-2, "60S ribosomal protein L13"
RPL24	P83731, "60S ribosomal protein L24"
CCT4	P50991;P50991-2, "T-complex protein 1 subunit delta"
HNRNPU	Q00839-2;Q00839, "Heterogeneous nuclear ribonucleoprotein U"
The protein identifications were either upregulated (red) or downregulated (green) in all analyzes
